# Supplementary material for: miR828 and miR858 regulate VvMYB114 to promote anthocyanin and flavonol accumulation in grapes
Source: PubMed Central journal article supplement — J Exp Bot. 2019 May 30;70(18):4775–92. doi: 10.1093/jxb/erz264 (PMC6760283; doi:10.1093/jxb/erz264), 2019-05-30
Supplement: erz264_suppl_supplementary_figures_s1-s15_tables_s1-s6_datasets_s1-s2.pdf [file erz264_suppl_supplementary_figures_s1-s15_tables_s1-s6_datasets_s1-s2.pdf]

## **Supplementary information**

miR828 and miR858 regulate VvMYB114 to promote anthocyanin and flavonol accumulation in grapes

**Varsha Tirumalai, Chenna Swetha, Ashwin Nair, Awadhesh Pandit, and P. V. Shivaprasad\***

### **Supplementary Figures**

Supplementary Fig. S1. Estimation of total anthocyanins and flavonols in fruit peels of grape lines used in this study.

Supplementary Fig. S2. DMACA staining of berries at various developmental stages.

Supplementary Fig. S3. TBO staining of berries at various developmental stages.

Supplementary Fig. S4. Small RNA profiling across selected grape lines.

Supplementary Fig. S5. Differential expression of known MicroRNAs across grape lines.

Supplementary Fig. S6. Sequence variations of miR828 and miR858 among plants

Supplementary Fig. S7. Phylogenetic tree of MYBs from grapes and targeting abilities of miR828 and miR858.

Supplementary Fig. S8. Schematic diagram of miRNA-mediated cleavage in MYB mRNAs through degradome analysis.

Supplementary Fig. S9. MYB RNAs accumulate differentially between grape lines.

Supplementary Fig. S10. MYB proteins accumulate differentially between grape tissues and lines.

Supplementary Fig. S11. Linear diagrams of the constructs used in this study.

Supplementary Fig. S12. Analysis of secondary silencing cascade in WER locus.

Supplementary Fig. S13. Phylogenetic tree of MYB activators and repressors from various plant species.

Supplementary Fig. S14. Quantification of anthocyanin content and RT-PCR from samples transiently expressing MYB genes and miRNAs.

Supplementary Fig. S15. Phenotypes of MYB expressing transgenic plants.

### **Supplementary Tables**

Supplementary Table S1. Summary of small RNA statistics.

Supplementary Table S2. Abundance and targets of conserved miRNAs from grape lines.

Supplementary Table S3. List of oligonucleotides used as probes.

Supplementary Table S4. Details of primer pairs used for cloning and qRT-PCR.

Supplementary Table S5. Mass spectrometric analysis of total proteins from reproductive tissues of the DK and BB grape lines.

Supplementary Table S6. Mass spectrometric analysis of total proteins from reproductive tissues of the DK and RG grape lines.

### **Supplementary datasets**

Supplementary Data Set S1. Differently expressed genes among the fruit peel samples.

Supplementary Data Set S2. Differently expressed genes among grape young leaf samples.

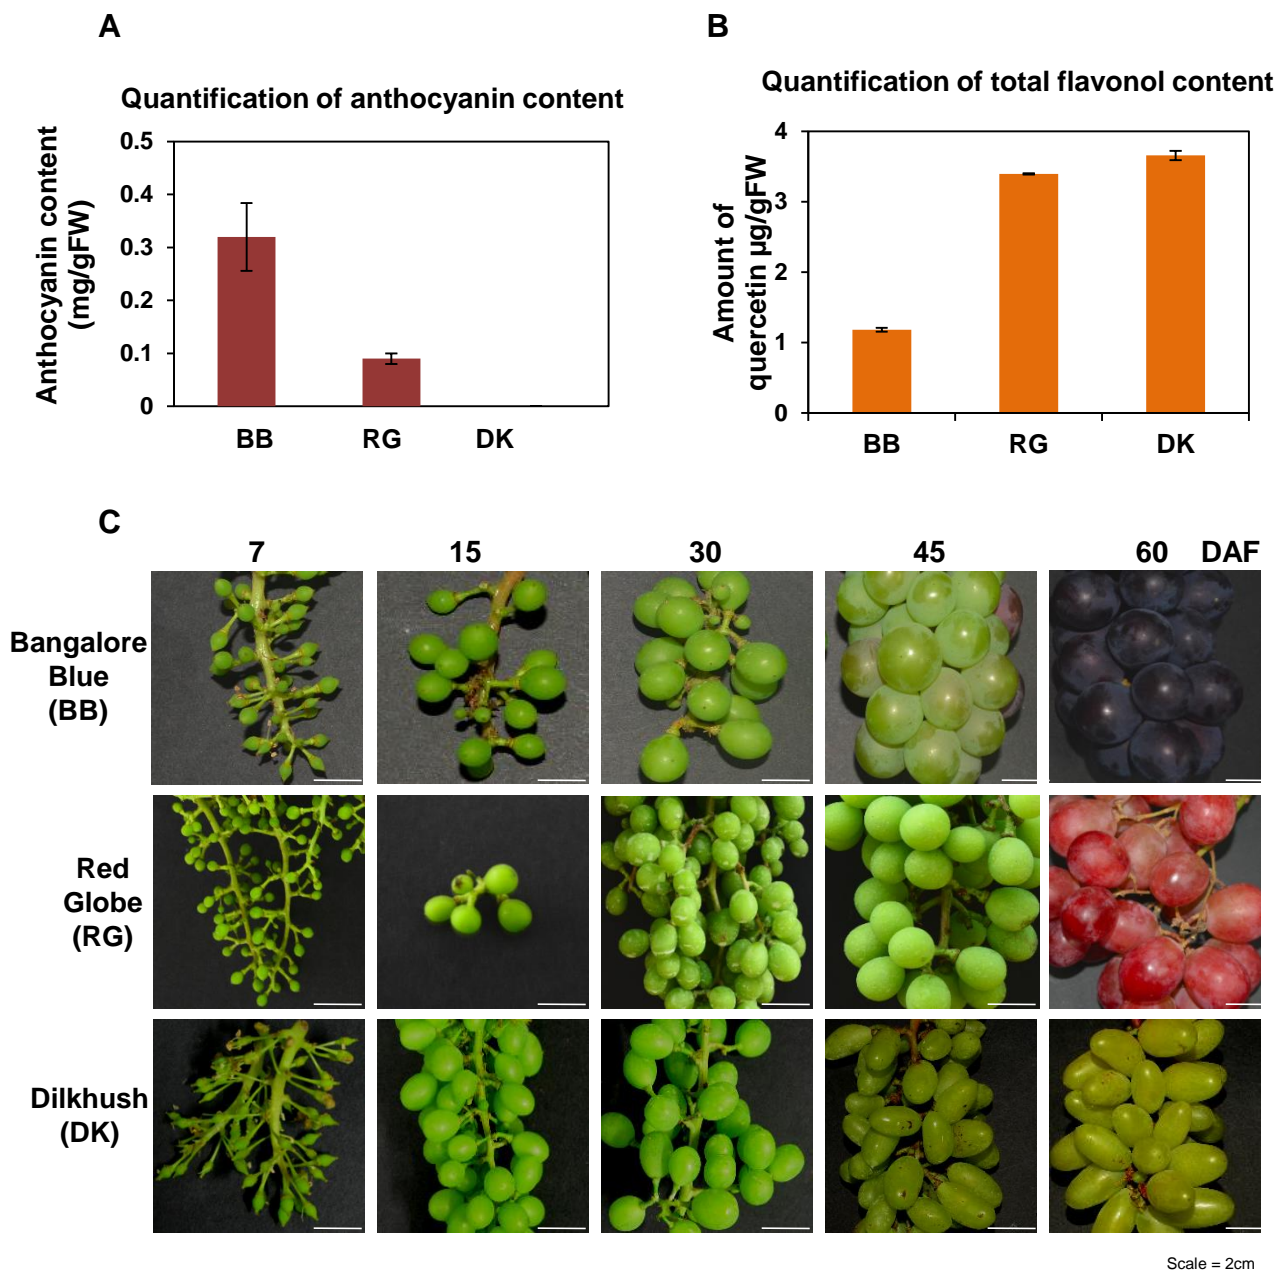

Supplementary Fig. S1. Estimation of total anthocyanins and flavonols in fruit peels of the grape lines used in this study. (A) Estimation of total anthocyanin from the fruits peels of three varieties of grapes. Berries at 60 DAF (days after fertilization) were used for the estimation. The total anthocyanin was estimated as amount of malvidin. Data is represented as mean  $\pm$  SE of three replicates. (B) Estimation of total flavonols from the fruits peels. Berries at 60 DAF were used for the estimation. The total flavonoil content is estimated as amount of quercetin in the sample. Data is represented as mean  $\pm$  SE of three replicates. (C) Grape berries at various developmental stages for the lines used in this study. Only at 60DAF the accumulation of anthocyanin is seen in BB and RG lines. Scale - 2cm.

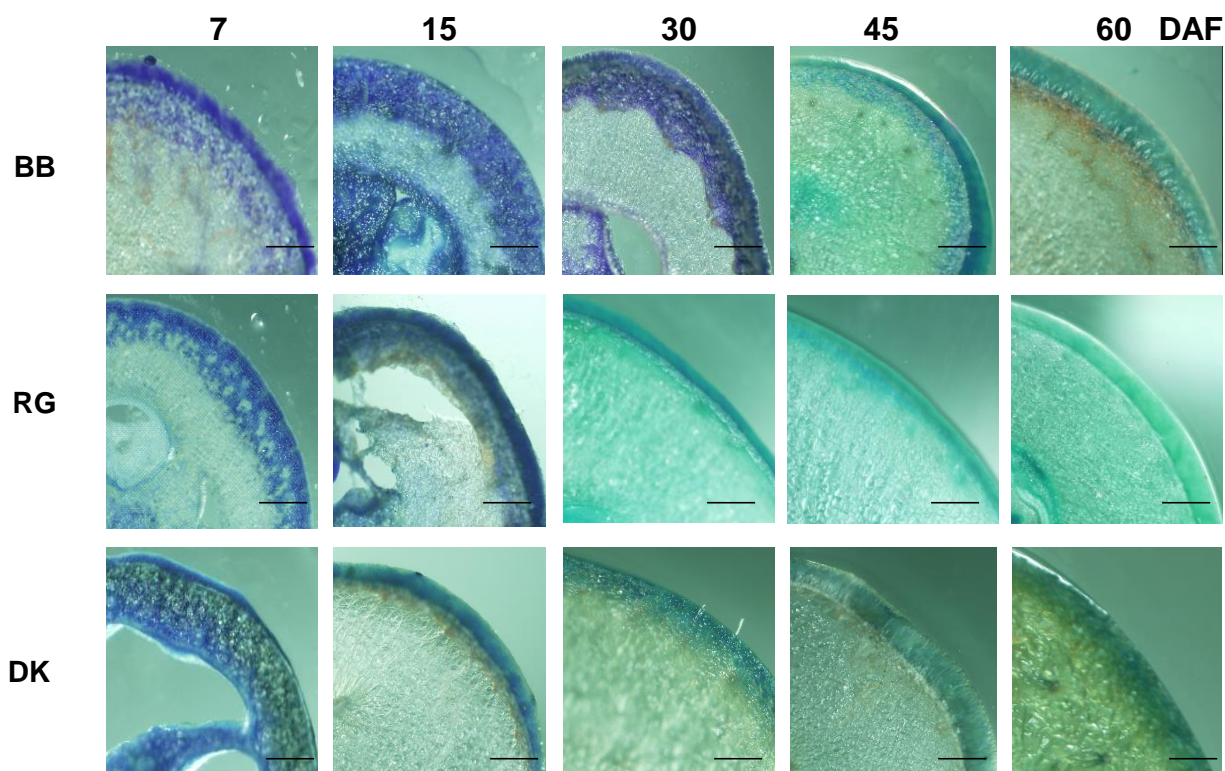

Scale = 300  $\mu$ m

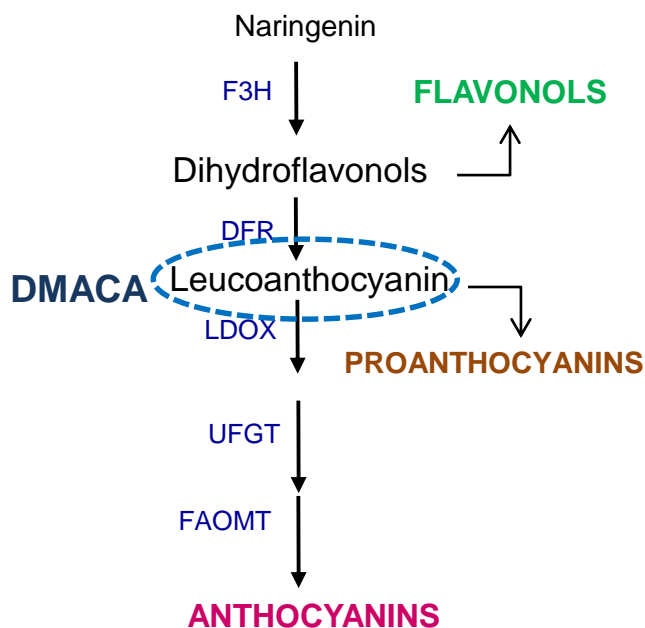

Supplementary Fig. S2. DMACA staining of berries at various developmental stages. Sections of berries at various DAF were stained for the detection of proanthocyanidins (PA) and their precursor molecules using DMACA. Purple/blue color represents presence of PA compounds. Scale - 300 $\mu$ m.

The schematic highlights the precursor molecule to which DMACA binds in the phenylpropanoid pathway.

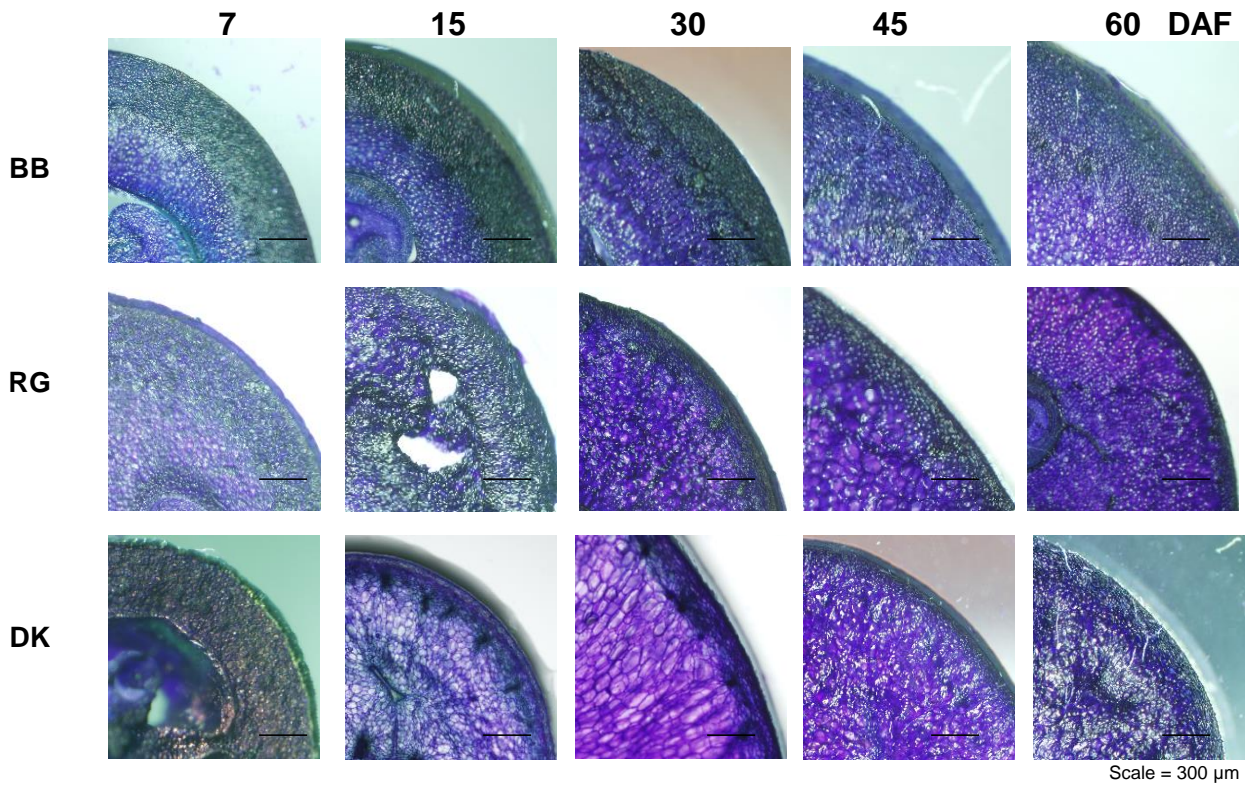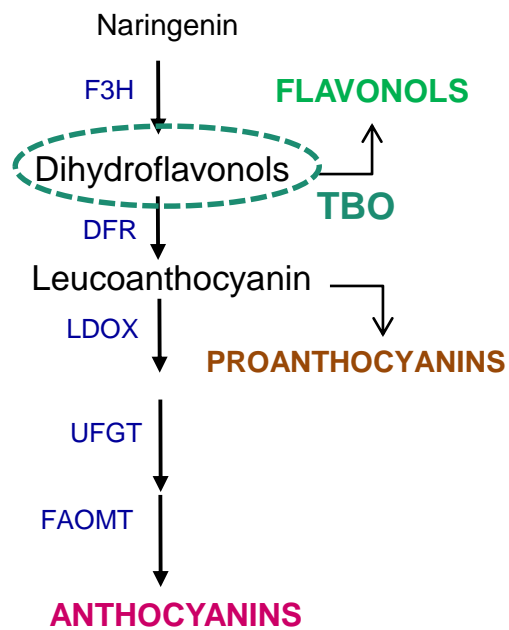

Supplementary Fig. S3. TBO staining of berries at various developmental stages. Sections of berries at different stages after fertilization were stained for the detection of Dihydroflavonols using TBO. Greenish-blue color represents the presence of precursor molecules of anthocyanins. Scale - 300μm. The schematic in the bottom panel shows to which precursor molecule TBO binds.

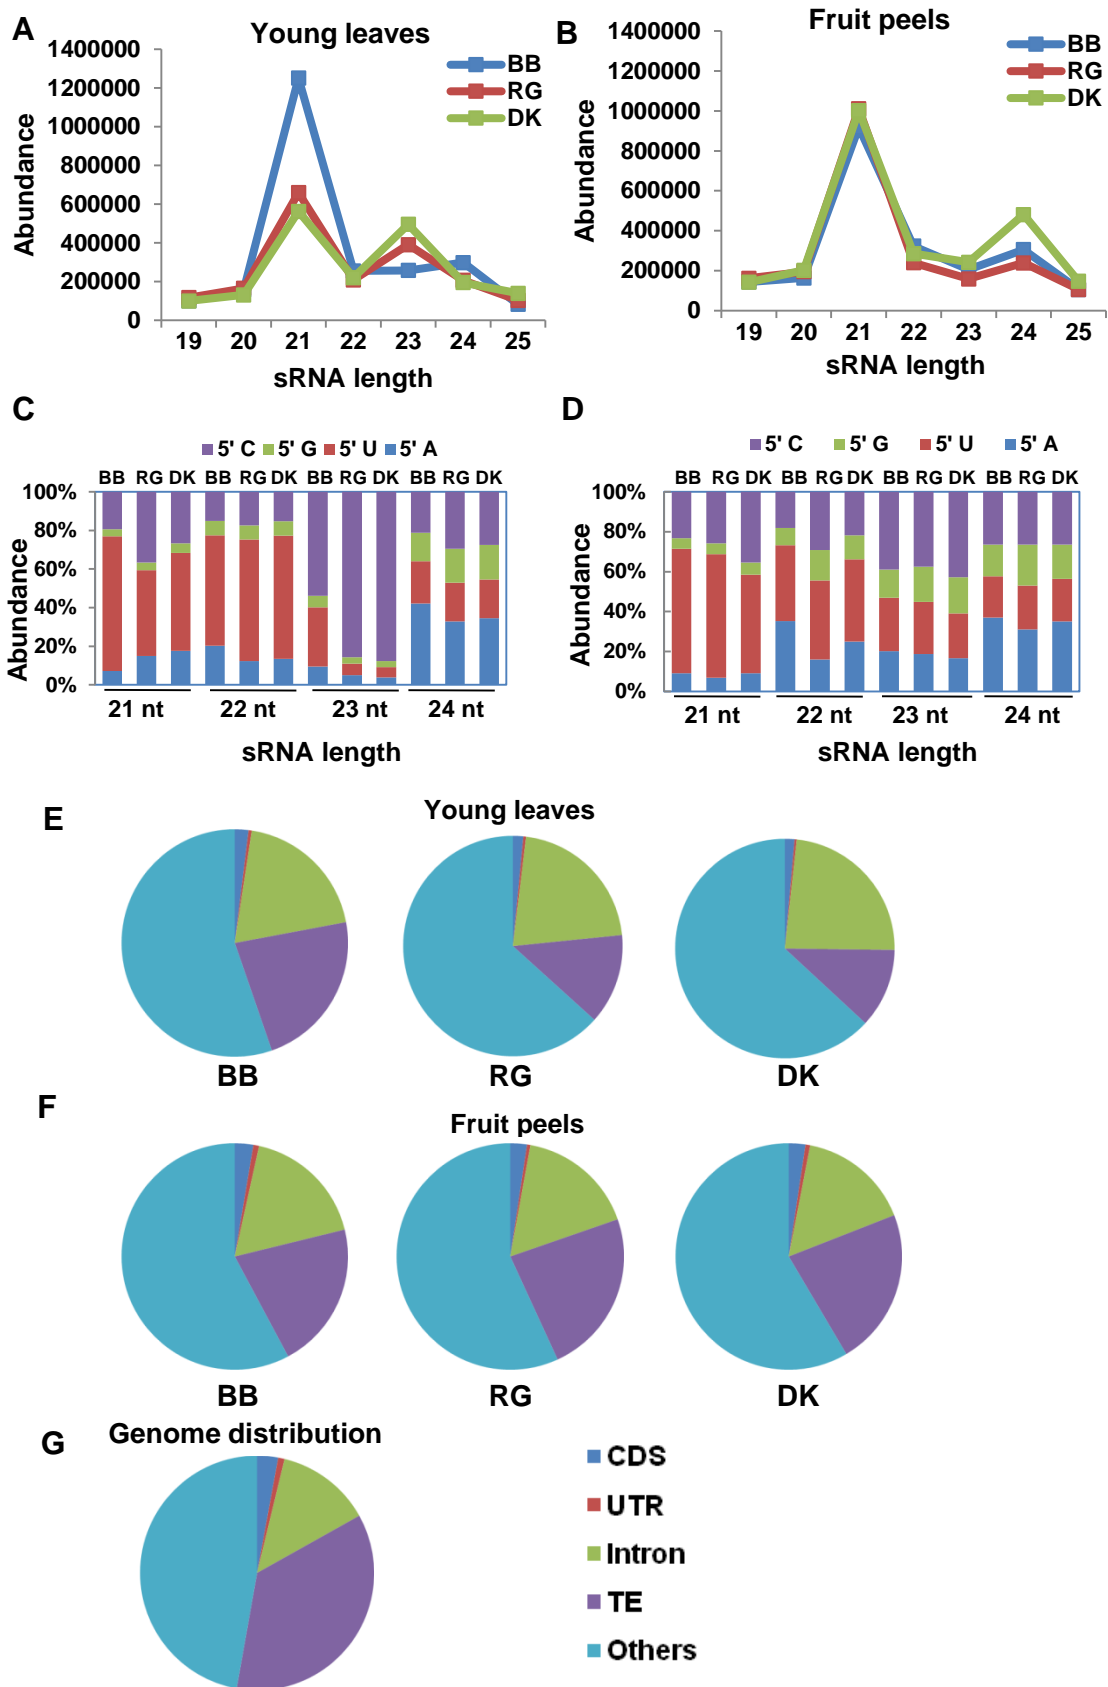

Supplementary Fig. S4. Small RNA profiling across selected grape lines. Small RNA profile of young leaf (A) and fruit peel (B) tissues of three grape lines. Values are average of two biological replicates. Nucleotide preferences of the small RNAs at 5' position in young leaves (C) and fruit peels (D). Distribution of siRNAs found in small RNA datasets of three grape lines in young leaves (E) and fruit peels (F). Pie charts shows the percentage of reads mapping to CDS (coding regions), UTR (untranslated regions), introns, TE (transposable elements) and other repeats in the annotated *Vitis vinifera* genome. In (G), genomic representation indicating percentage of genomic regions in the grape genome to highlight unusually high percentage of intronic and transposon regions.

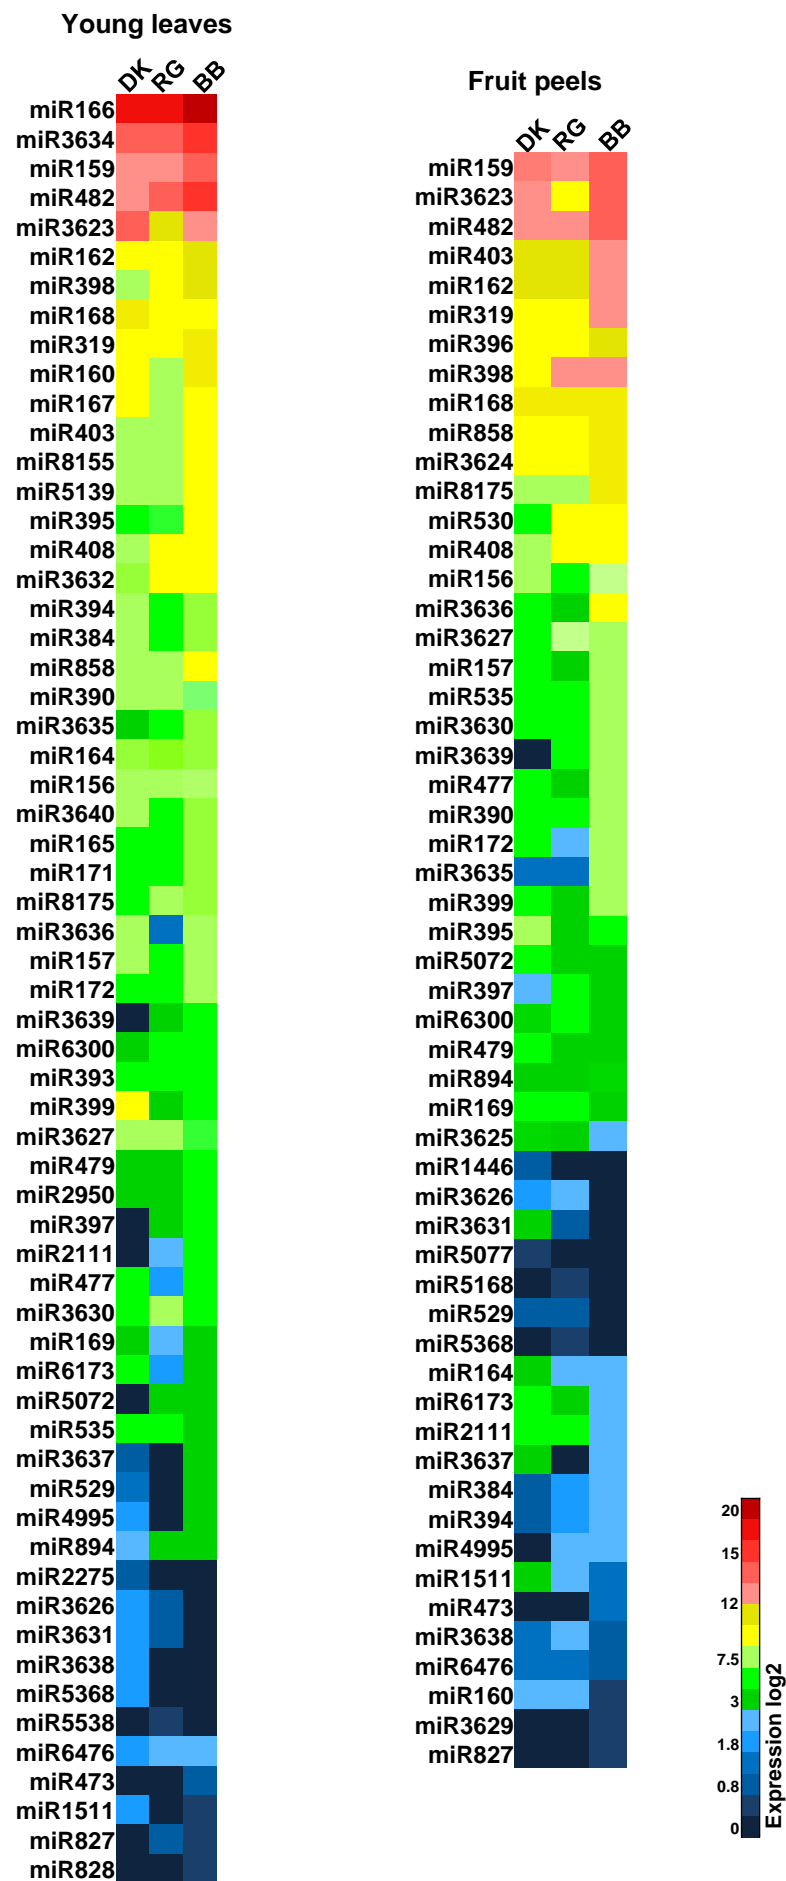

Supplementary Fig. S5. Differential expression of known MicroRNAs across grape lines.

Heat maps of conserved and non-conserved miRNAs(miRBase ver. 21) across the young leaves and fruit peel tissues of grape lines. A cut-off of  $\log_2(\text{fold change}) > 2$  was used for differential expression analysis of miRNA.

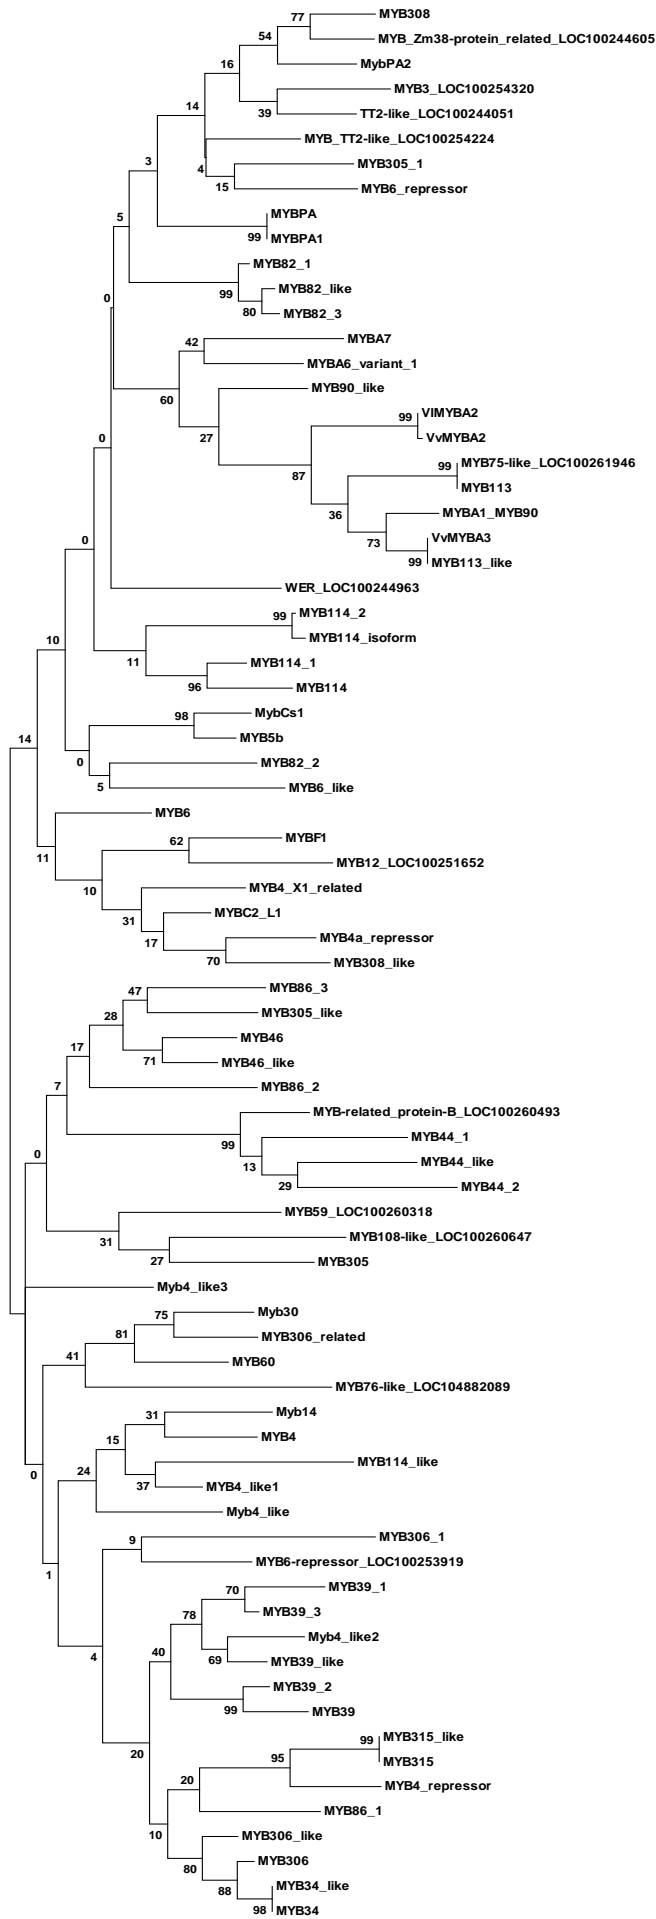

miR828  
miR858  
miR827  
miR156  
miR159

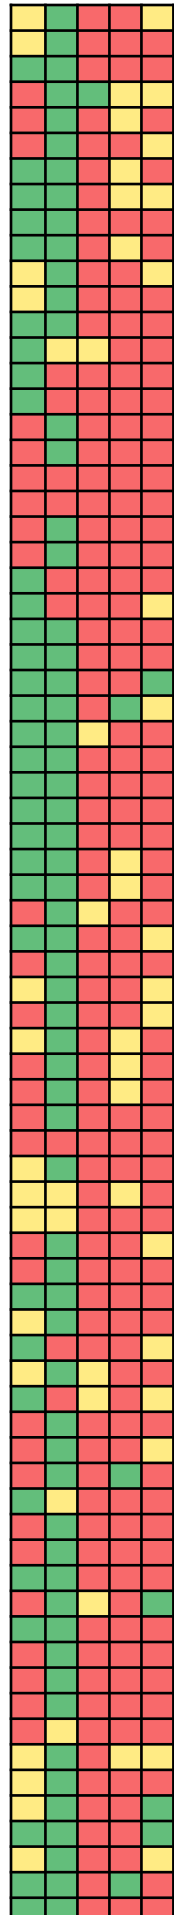

Target score < 8  
Target score 8-15  
Non target



Supplementary Fig. S6. Phylogenetic tree of MYBs from grapes and targeting abilities of miR828, miR858, miR827, miR156 and miR159.

The sequences of mRNA belonging to R2R3 MYB family were obtained from NCBI. The phylogenetic tree was constructed using maximum likelihood method using bootstrap 100. The figure also shows the miRNAs that target different MYB mRNAs, predicted using TAPIR analysis. Colored boxes indicate extent of MYB targeting, generated using TAPIR.

|          |               |                        |
|----------|---------------|------------------------|
| <b>A</b> | Mdm-miR858    | -UUCGUUGUCUGUUCGACCUGA |
|          | Ath-miR858a   | UUUCGUUGUCUGUUCGACCUU- |
|          | Aly-miR858-5p | UUUCGUUGUCUGUUCGACCUU- |
|          | Ppe-miR858    | -CUCGUUGUCUGUUCGACCUUG |
|          | Vvi-miR858    | -UUCGUUGUCUGUUCGACCUUG |
|          | Ath-miR858b   | -UUCGUUGUCUGUUCGACCUUG |
|          |               |                        |
| <b>B</b> | Ath-miR828    | UCUUGCUCAAAUGAGUAUCCA  |
|          | Mes-miR828a   | UCUUGCUCAAAUGAGUAUCCA  |
|          | Mdm-miR828b   | UCUUGCUCAAAUGAGUAUCCA  |
|          | Mdm-miR828a   | UCUUGCUCAAAUGAGUAUCCA  |
|          | Gma-miR828a   | UCUUGCUCAAAUGAGUAUCCA  |
|          | Cme-miR828    | UCUUGCUCAAAUGAGUAUCCA  |
|          | Ptc-miR828a   | UCUUGCUCAAAUGAGUAUCCA  |
|          | Vvi-miR828a   | UCUUGCUCAAAUGAGUAUCCA  |
|          | Ssl-miR828    | UCUUGCUCAAAUGAGUAUCCA  |
|          | Gma-miR828b   | UCUUGCUCAAAUGAGUAUCCA  |
|          | Mes-miR828b   | UCUUGCUCAAAUGAGUAUCCA  |
|          | Lus-miR828a   | UCUUGCUCAAAUGAGUGUCCA  |

Supplementary Fig. S7. Sequence variations among selected miRNAs. The sequences of MYB targeting microRNAs such as miR858 (A), miR828 (B) obtained from miRBase. The mismatch is represented in black.

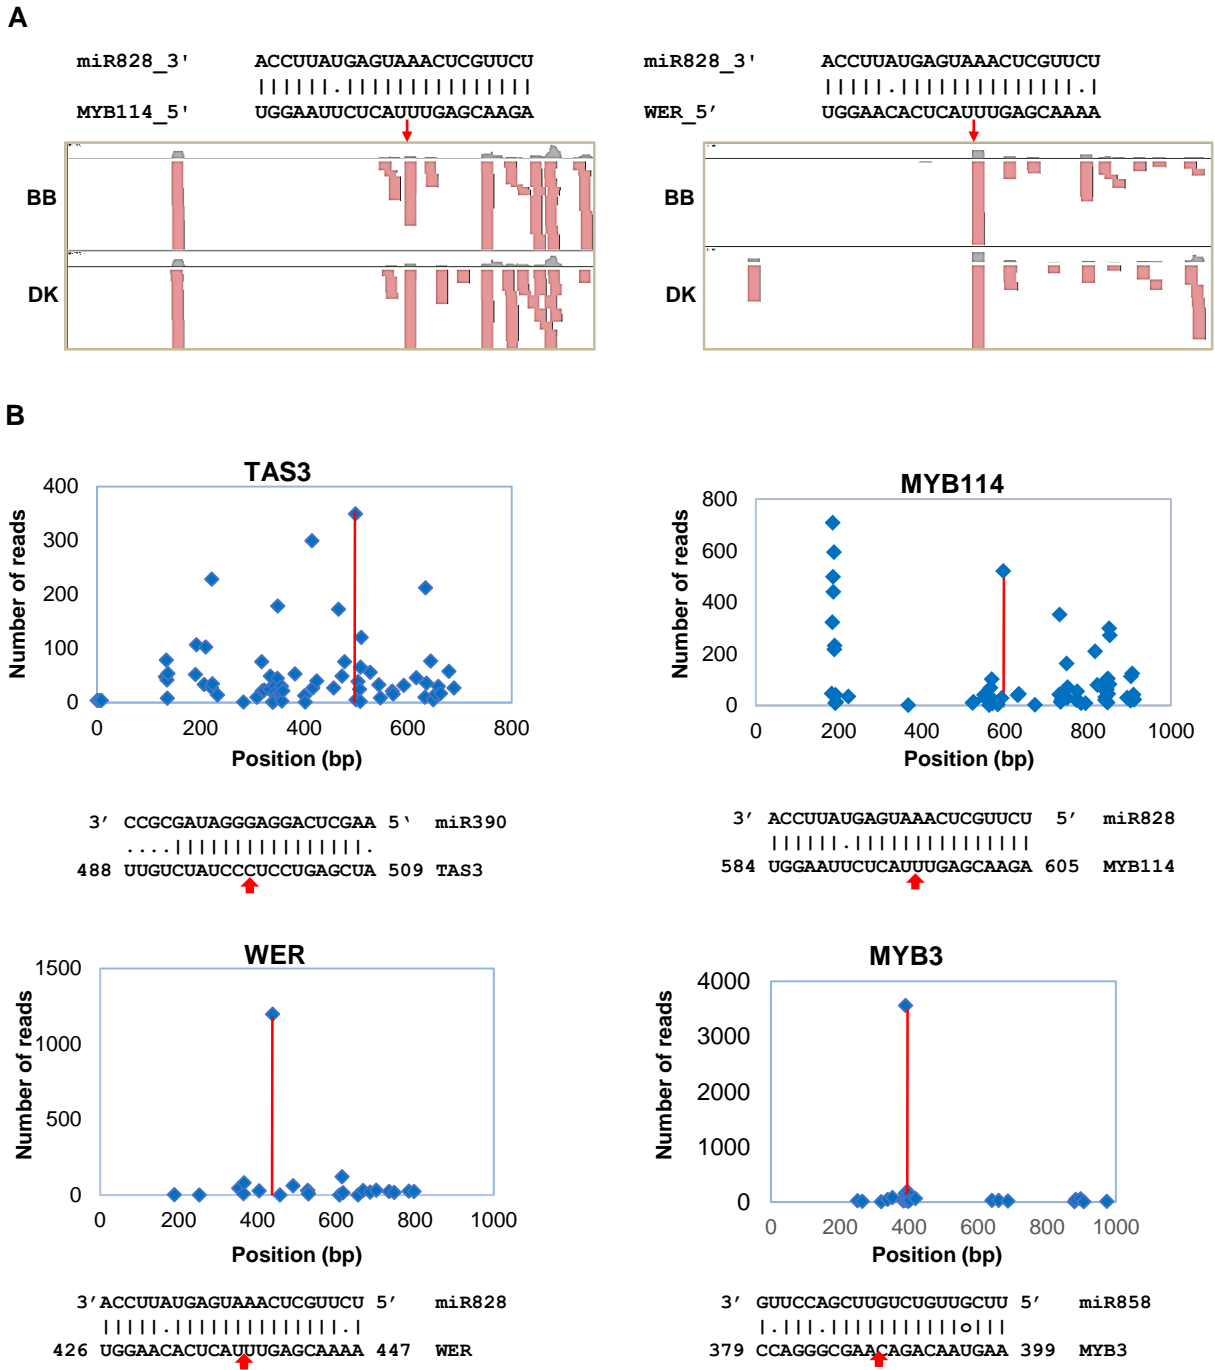

Supplementary Fig. S8. (A) Schematic diagram of miR828 mediated cleavage in MYB114 and WER in BB and DK. The degradome datasets were obtained from GSE118701 the reads were aligned to the MYB sequences using in-house pipelines and results were represented as T-plots (B). The sequence pairing of the miRNA – mRNA is shown below with cleavage site marked. TAS3 served as a control.

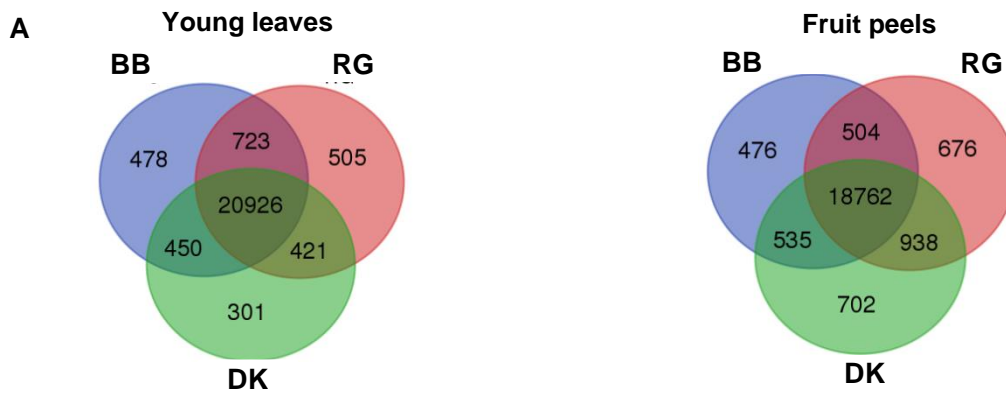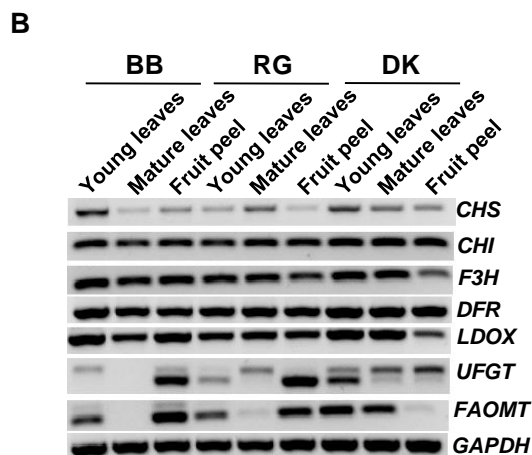

Supplementary Fig. S9. (A) Venn diagram representing total number of genes identified among grape lines. (B) RT-PCR confirmation of differential expression for specific phenylpropanoid pathway mRNAs.

**A**

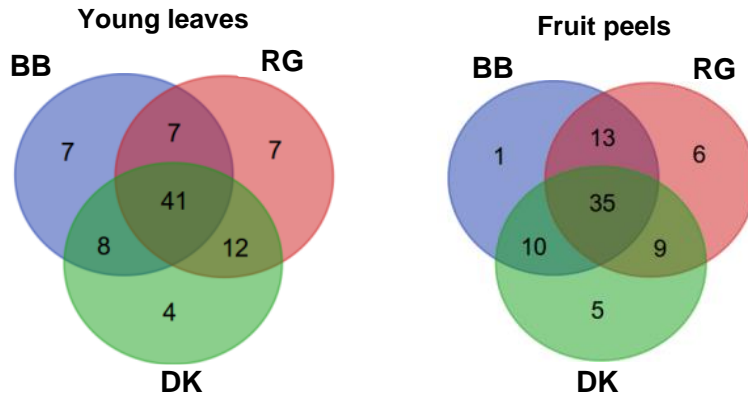

**B**

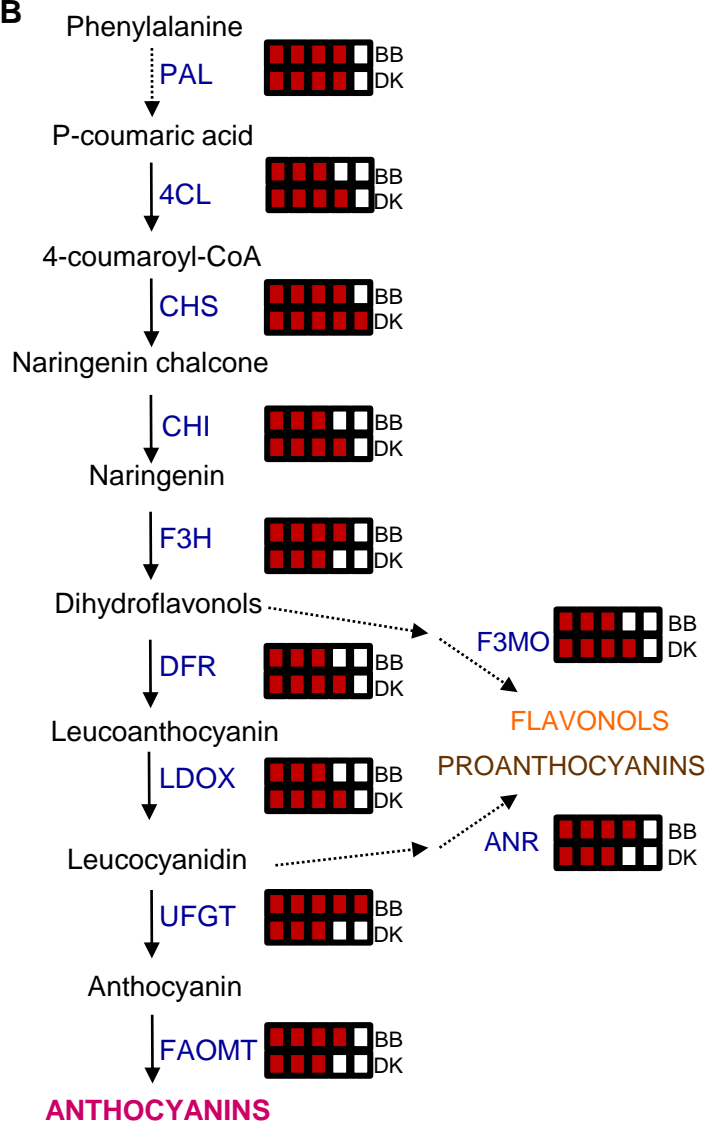

Supplementary Fig. S10. MYB proteins accumulate differentially between grape tissues and lines. (A) Venn diagram summarizing differentially expressed proteins identified by LC-MS/MS analysis. (B) Schematic representation of comparative expression of phenylpropanoid pathway proteins in fruit peels of BB and DK lines. Values represented as filled boxes out of 5.

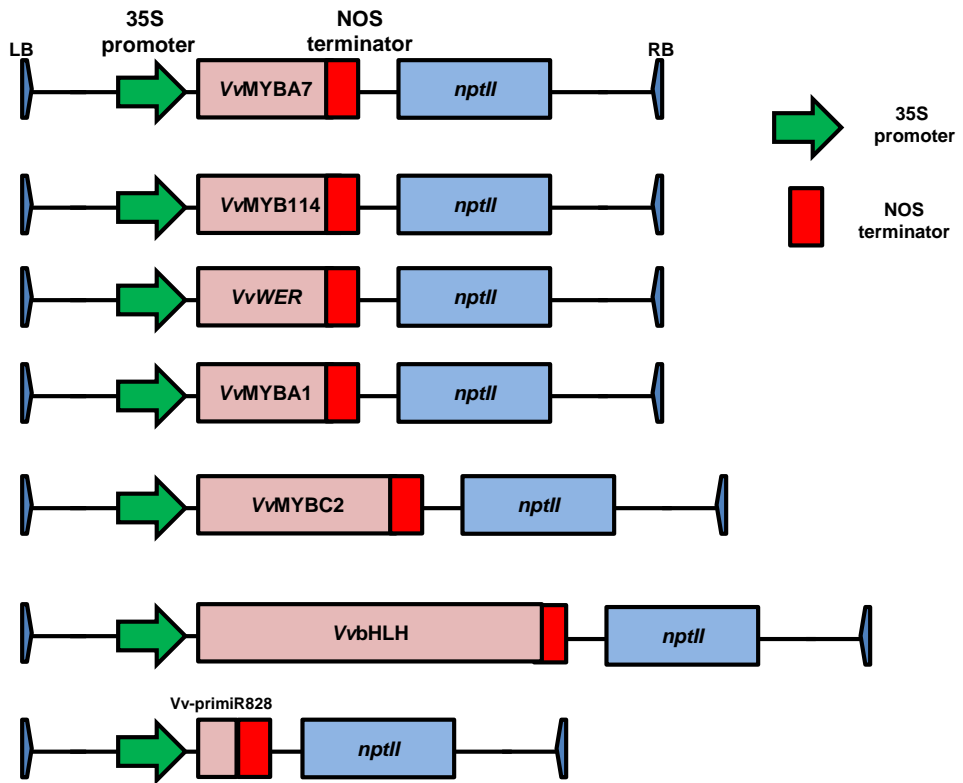

Supplementary Fig. S11. Linear diagrams of the constructs used in this study.

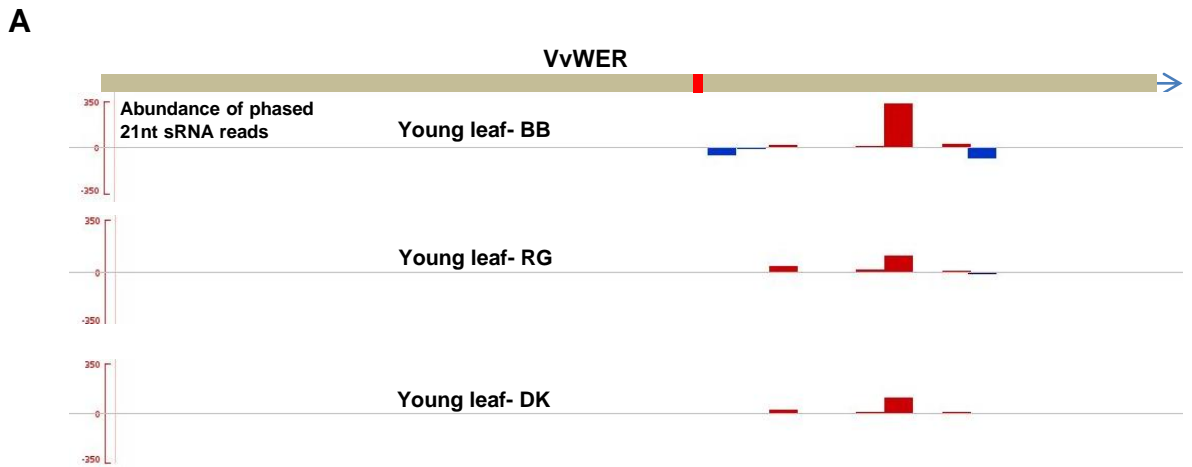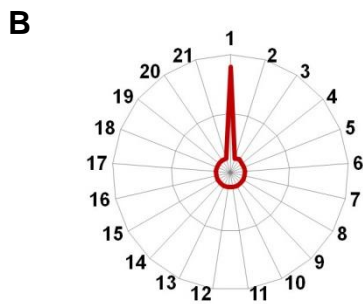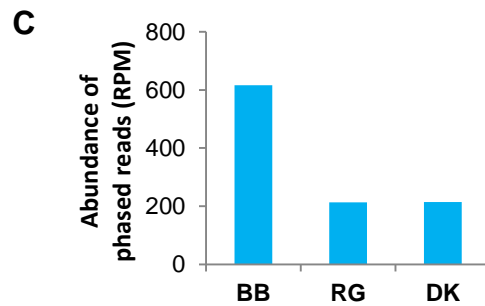

Supplementary Fig. S12. Analysis of secondary silencing cascade in WER locus. (A) A schematic representation of phased sRNA matching WER locus in different grape lines. miR828 target site is shown as red box. (B) Phasing register for WER locus. (C) Abundance of phased siRNAs in grape lines.

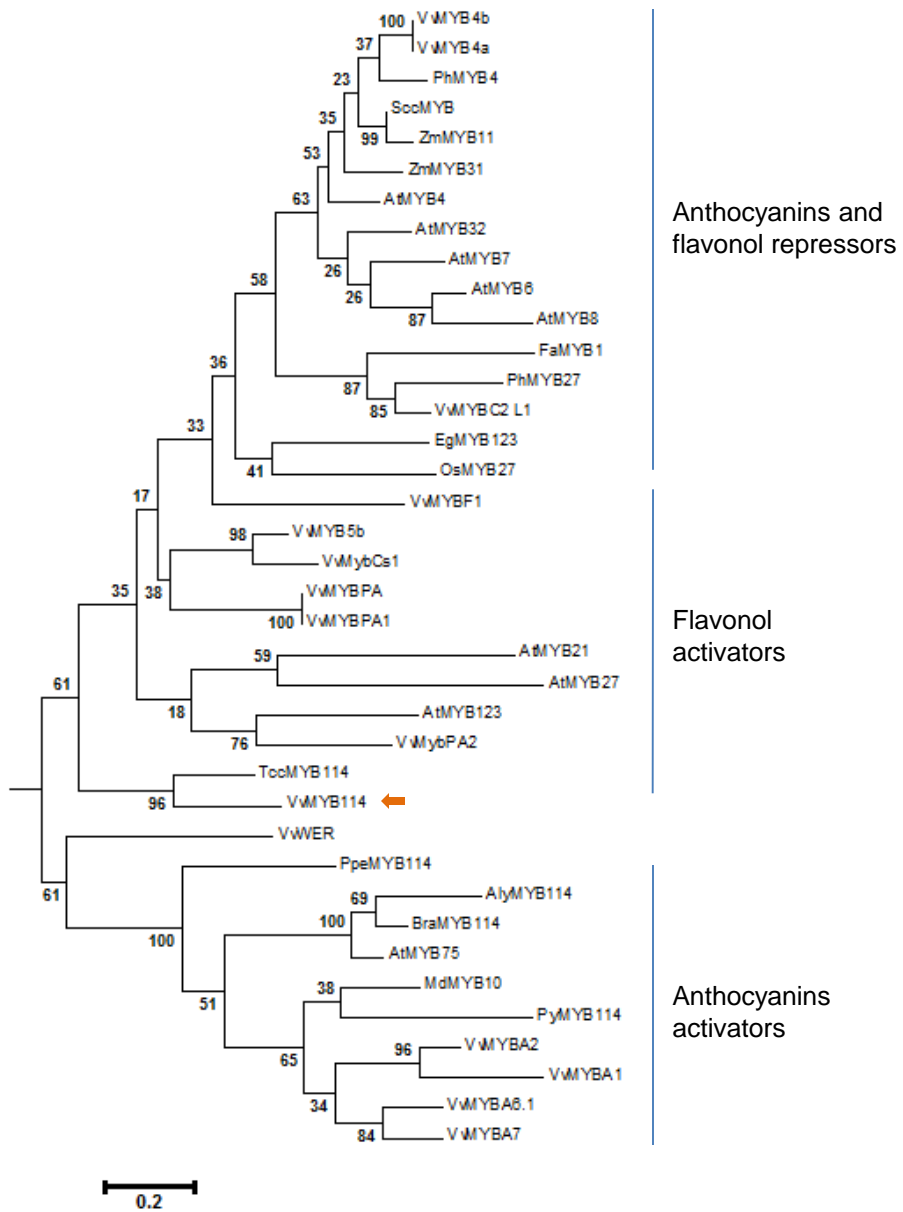

Supplementary Fig. S13. Phylogenetic tree of MYB activators and repressors from various plant species. The sequences R2R3 MYB family members were obtained from NCBI. The phylogenetic tree was constructed using maximum likelihood method using bootstrap 100. *Vitis* MYB114 falls into a unique clade.



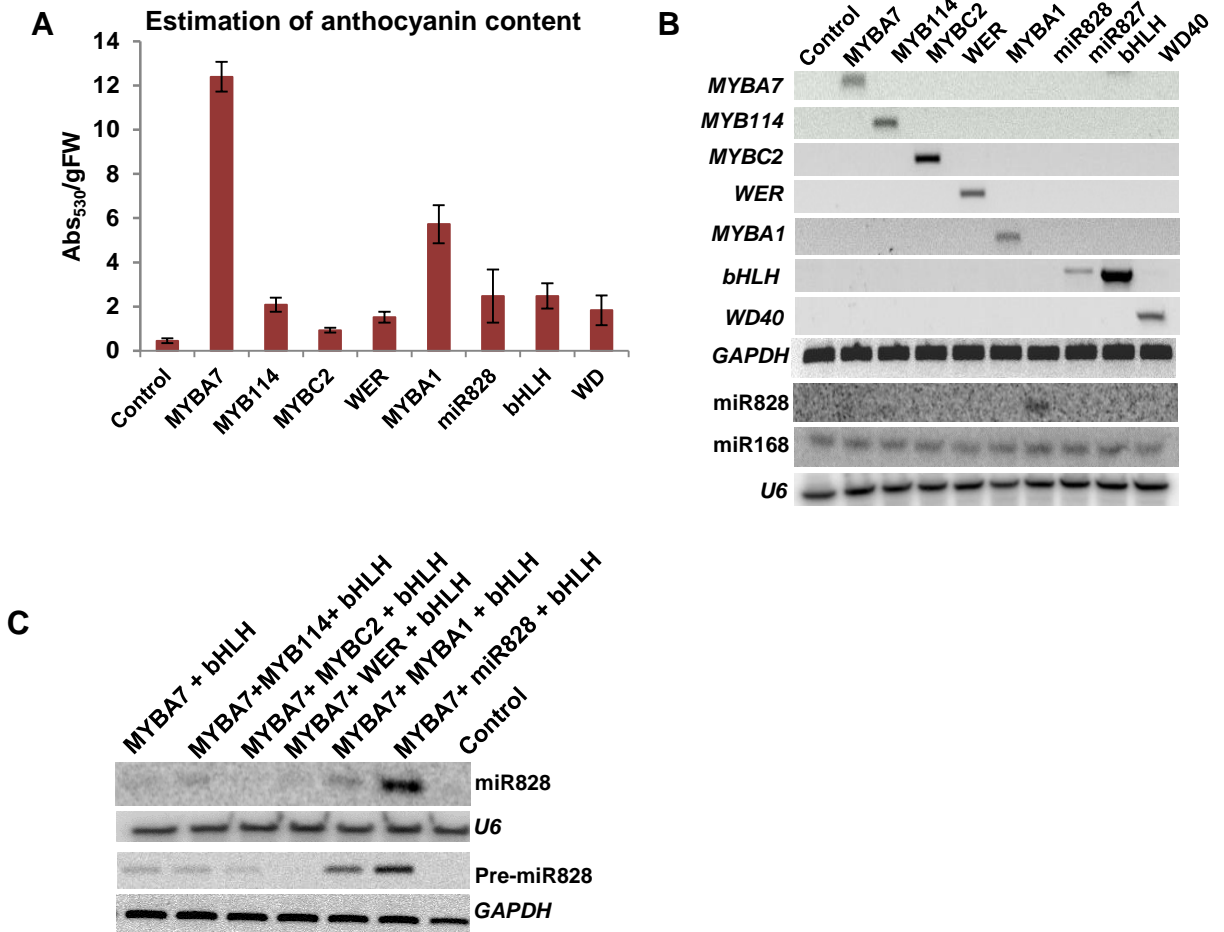

Supplementary Fig. S14. Estimation of anthocyanin and RT-PCR from samples transiently expressing MYB genes and miRNAs. Panel (A) shows anthocyanin content in infiltrated tissues. Data is represented as mean  $\pm$  SE of three replicates. (B) Confirmation of expression of infiltrated MYBs and miRNAs. GAPDH and U6 served as controls for mRNAs and sRNAs, respectively. (C) MYBs can induce the transcription of MIR828 gene in grapes. The figures shows the northern hybridization for miR828 and an RT-PCR for pre-miRNA in MYB infiltrated samples. U6 and GAPDH serve as controls.

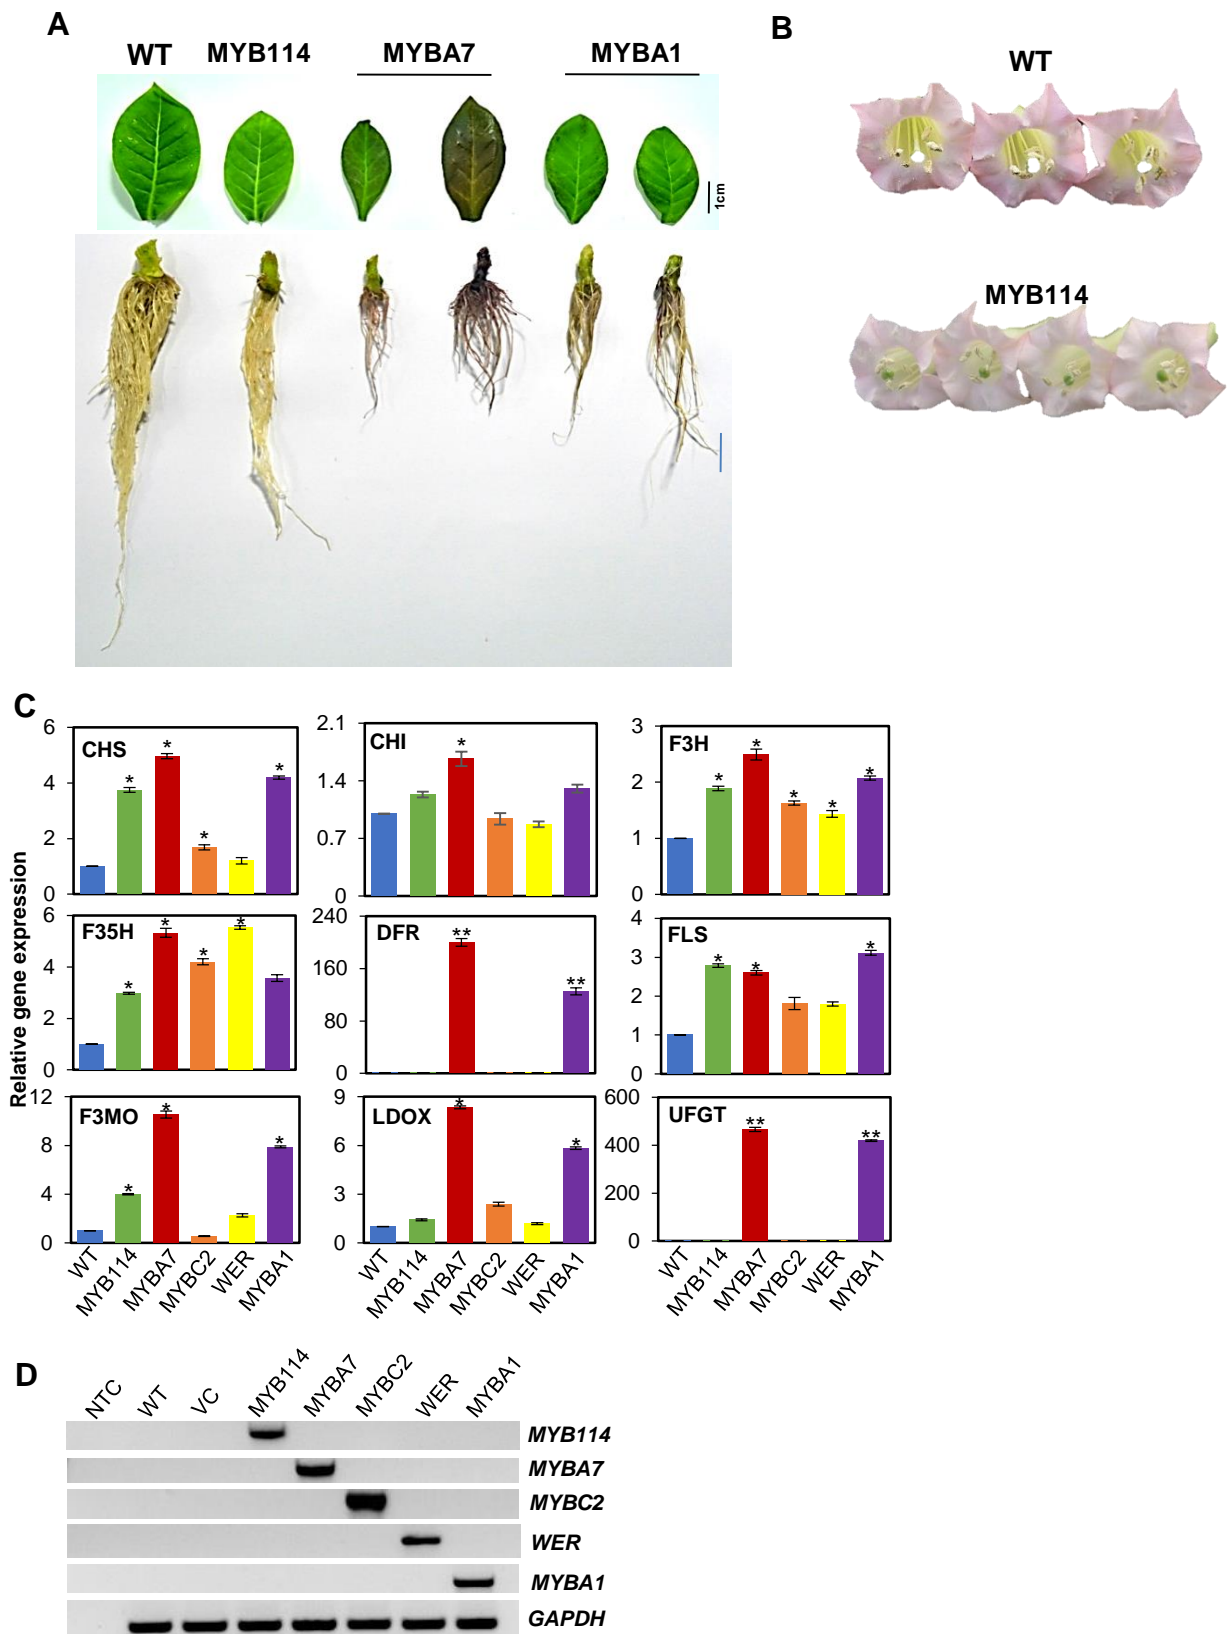

Supplementary Fig. S15. Phenotype of MYB expressing transgenic plants (A) (B). Phenotype of MYB114 OE flowers showing reduced anthocyanin accumulation. (C) Quantitative expression analysis for flavonol and anthocyanin biogenesis genes in selected transgenic plants using qRT-PCR from leaf samples. *GAPDH* served as control. Names of abbreviated genes are provided in Supplementary Table 4. (D) Expression of MYB in the stable transgenic lines used for qRT-PCR analysis. Wildtype (WT) and vector control (VC) plants serve as controls

Supplementary Table S1. Summary of small RNA statistics.

| Tissue type             | Fruit Peels |         |         |         |         |         |
|-------------------------|-------------|---------|---------|---------|---------|---------|
| Sample                  | BB          |         | RG      |         | DK      |         |
| Replicates              | Repl1       | Repl2   | Repl1   | Repl2   | Repl1   | Repl2   |
| Raw reads               | 4797025     | 6903409 | 8246098 | 7894012 | 6168563 | 9569854 |
| Adapter removal         | 3128908     | 4545833 | 4317205 | 2984465 | 3226760 | 6224913 |
| length range filtering  | 3054540     | 4438658 | 4233235 | 2951279 | 3157230 | 5996036 |
| tRNA and rRNA filtering | 2373670     | 3452196 | 2921455 | 2033163 | 2267425 | 4382717 |
| Mapped reads            | 1944630     | 2817459 | 2461231 | 1735944 | 1860635 | 3542731 |
| Unmapped reads          | 429040      | 634737  | 460224  | 297219  | 406790  | 839986  |

| Tissue type             | Young Leaves |         |         |         |         |         |
|-------------------------|--------------|---------|---------|---------|---------|---------|
| Sample                  | BB           |         | RG      |         | DK      |         |
| Replicates              | Repl1        | Repl2   | Repl1   | Repl2   | Repl1   | Repl2   |
| Raw reads               | 4811769      | 5190376 | 4466191 | 5409542 | 3924482 | 6354301 |
| Adapter removal         | 2903654      | 3806901 | 2579779 | 3094438 | 2626420 | 4038183 |
| length range filtering  | 2879539      | 3736998 | 2534597 | 3050354 | 2557358 | 3860875 |
| tRNA and rRNA filtering | 2326868      | 3066587 | 1971143 | 2331884 | 2084750 | 3141770 |
| Mapped reads            | 2178416      | 2828362 | 1809466 | 2140280 | 1933757 | 2885775 |
| Unmapped reads          | 148452       | 238225  | 161677  | 191604  | 150993  | 255995  |

**Supplementary Table S2. Abundance and targets of conserved miRNAs from grape lines.**

| Known miRNA | Abundance (RPM) |         |          |             |          |         | Target                                                      |
|-------------|-----------------|---------|----------|-------------|----------|---------|-------------------------------------------------------------|
|             | Young leaves    |         |          | Fruit peels |          |         |                                                             |
|             | BB              | RG      | DK       | BB          | RG       | DK      |                                                             |
| miR156      | 51.745          | 20.255  | 30.96    | 39.835      | 4.72     | 19.865  | Squamosa-promoter Binding Protein (SBP) box gene            |
| miR159      | 5377.505        | 1370.5  | 2505.185 | 4053.2      | 1538.595 | 2494.51 | GaMYB, MYB genes for GA signalling                          |
| miR160      | 321.05          | 38      | 127.12   | 0.185       | 1.745    | 1.8     | Auxin response factor (ARF17, ARF10)                        |
| miR162      | 848.82          | 189.71  | 360.46   | 1042.995    | 356.755  | 547.13  | DNA-directed RNA polymerase 1, mitochondrial (LOC100263361) |
| miR164      | 65.115          | 38.515  | 52.835   | 0.9         | 0.71     | 1.18    | NAC domain-containing protein 100-like (LOC100251801)       |
| miR166      | 281433.6        | 107205  | 102313.4 | 183180.9    | 224142.3 | 131408  | Homeobox-leucine zipper protein                             |
| miR167      | 278.5           | 75.94   | 170.65   | 35.58       | 40.6     | 35.46   | Auxin response factor                                       |
| miR168      | 479.745         | 293.355 | 342.99   | 387.16      | 281.29   | 358.51  | Argonaute protein                                           |
| miR169      | 4.065           | 0.975   | 4.28     | 1.085       | 11.43    | 5.73    | NFYA5 transcription factor                                  |
| miR171      | 34.475          | 13.835  | 18.005   | 36.14       | 18.745   | 32.695  | Scarecrow-like protein                                      |
| miR172      | 19.175          | 4.48    | 8.815    | 10.41       | 0.84     | 4.765   | AP2-like ethylene-responsive transcription factor           |
| miR319      | 414.73          | 241.05  | 83.805   | 975.725     | 213.025  | 365.58  | Transcription factor TCP4                                   |
| miR390      | 82.4            | 19.625  | 13.935   | 14.885      | 4.905    | 1.775   | TAS3                                                        |
| miR393      | 10.78           | 2.64    | 4.965    | 85.465      | 43.115   | 42.72   | Auxin signaling F-box protein                               |
| miR394      | 87.125          | 15.605  | 18.69    | 0.715       | 0.585    | 0.25    | F-box only protein                                          |
| miR395      | 21731           | 31589   | 31593    | 3693        | 7773     | 31147   | Sulfate transporter                                         |
| miR396      | 1823.215        | 572.98  | 1253.625 | 786.145     | 275.255  | 548.045 | Growth-regulating factor                                    |
| miR397      | 7.375           | 1.665   | 0        | 3.72        | 8.34     | 1.085   | Laccase                                                     |
| miR398      | 578.19          | 433.09  | 37.97    | 766.57      | 1406.285 | 168.63  | Unknown                                                     |
| miR399      | 9.605           | 1.375   | 53.635   | 8.795       | 4.455    | 8.99    | Phosphate transporter                                       |
| miR403      | 249.86          | 88.27   | 84.01    | 2125.415    | 304.39   | 327.63  | Argonaute protein AGO2                                      |
| miR477      | 6.005           | 0.46    | 9.05     | 15.675      | 1.745    | 5.005   | DELLA protein GAI (LOC100263271)                            |
| miR482      | 4955.485        | 4703.7  | 3392.925 | 2247.685    | 1911.25  | 1812.91 | Uncharacterized LOC100853159                                |
| miR828      | 0.185           | 0       | 0        | 0           | 0        | 0       | R2R3 MYB transcription factor                               |
| miR2111     | 7.335           | 0.805   | 0        | 0.715       | 7.64     | 4.015   | GTP-binding protein                                         |
| miR3632     | 148.035         | 228.315 | 130.145  | 55.515      | 34.085   | 32.72   | Disease resistance protein At1g50180                        |

**Supplementary Table S3. List of oligos used as probes.**

| <b>Probe Name</b> | <b>sequence (5'→3')</b>       |
|-------------------|-------------------------------|
| Vv-miR828         | TGGAATACTCATTTGAGCAAGA        |
| Vv-miR858         | CAAGGTCGAACAGACAACGAA         |
| MYB114_TASI       | TCAGAGAACAAGAGTGGTAGA         |
| WER_TASI          | AGAGCTCTCTTTGGTTTTCTA         |
| <i>U6-I</i>       | GGCCATGCTAATCTTCTCTGTATCGTT   |
| <i>U6-II</i>      | CCAATTTTATCGGATGTCCCCGAAGGGAC |
| miR168            | GTCCCGACCTGCACCAAGCGA         |
| miR156            | GTGCTCACTCACTTCTGTCA          |

**Supplementary Table S4. Details of primer pairs used for cloning and qRT-PCR**

| Construct name | Accession numbers | Primer pairs sequence (5'→3')                                               | Gene name                                |
|----------------|-------------------|-----------------------------------------------------------------------------|------------------------------------------|
| MYBA7          | NM_001281073      | TAGGTCGGATCCTTATGGAGGGCTTTAGGT<br>TCCGTGAGCTCATCATGCATTATGAGATCC            |                                          |
| MYB114         | XM_002273955      | GAGAGGGATCCATGGCTGAGAAGGAAGTGAAG<br>GTCTTGAGCTCTTATGAAGGATGGCATAAGCCC       |                                          |
| MYBC2          | NM_001281204      | ATACCGGATCCATGAGGATGCCCTGCTGT<br>TAACAGAGCTCTCATCCAAAGAGGAGCAGCGTG          |                                          |
| WER            | XM_002279092      | CTGCTGGATCCATGGAGGGAGCAAATG<br>CAAAGGTCGACTTACAAGCCATCCCAAAC                |                                          |
| MYBA1          | AB097923          | GTTAGATCTATGGAGAGCTTAGGAGTTAGAAAGGG<br>GAATGAGCTCTCAGATCAAGTGATTTACTTGTGTG  |                                          |
| bHLH           | NM_001281045      | GTGTGICTAGATGGCTAATGGGTCC<br>TCCATCGAGCTCTCAGCATTGCTTGTATC                  | Basic helix loop helix                   |
| WD40           | NM_001281077      | CACCAGGATCCATGGAGAGATCAAG<br>CAACAGAGCTCCTAAACTTTAAGAAGCTGC                 | WD40 repeat                              |
| miR828         | MI0007972         | GAAAAAGGATCCACTCCCTATAAAGTTTCTTGCTC<br>GAAGAAGAAGAGCTCTCCATTTTAAGGTTGCTTCTC |                                          |
| MYBA6          | XM_002274956      | TACCCGGGGTGGAGATGCCTGAATTTGG<br>GGCATTGAAGCTTGACAAGG                        |                                          |
| Vv-CHS         | NM_001280950.1    | CAGTGAGCACATGACCGAGT<br>TCGATTGCTCCTTCGGAGTC                                | Chalcone synthase                        |
| Vv-CHI         | NM_001281104.1    | GTCACAGGCCCTTTGAGAA<br>AAACACCATGCTTGCCGATG                                 | Chalcone isomerase                       |
| Vv-F3H         | KP966099.1        | GGATGGCGGAAAGACTTGGA<br>TGGTCAATGGGCTTGACTC                                 | Flavanone 3-hydroxylase                  |
| Vv-DFR         | NM_001281215.1    | CGGTTTCATCGTTTCATGGC<br>TTCGTTCCAGTGATCGGGG                                 | Dihydroflavonol 4-reductase              |
| Vv-LDOX        | NM_001281218.1    | GACAGCTTGAGTGGGAGGAC<br>GGAAGAGTGGTGGCTCAGTC                                | Leucoanthocyanidin dioxygenase           |
| Vv-UGFT        | XM_002276999.4    | GCCCCAGGAGGATATTGAGC<br>CCTCAGCTAGGGCTACAAGC                                | UDP flavonoid-3-O-glucosyltransferase    |
| Vv-AOMT        | NM_001303082      | AGCTCAAGTCATAGGGGCATTC<br>TCCACCATCGCAAAGTCCAA                              | Anthocyanin methyltransferase            |
| Nt-GAPDH       | XM_016597540      | GGAGGAGGGAACAACAAGAGG<br>AGATGCCGTCACTGCCGA                                 | Glyceraldehyde 3-phosphate dehydrogenase |
| Nt-CHS         | AF311783.1        | TCGAGGAATTCGTAGGGCG<br>TTGATGGCTTTTTGGGCTGC                                 | Chalcone synthase                        |
| Nt-CHI         | AB213651.1        | TGCCTTTGACGGGTAAGCAA<br>CCTGACACTCTTCGGCGAT                                 | Chalcone isomerase                       |
| Nt-F3H         | AB289450.1        | ACTGTTGAGCCGTTGAAGG<br>TTTCAACTTGGCCTTCTCAGC                                | Flavanone 3-hydroxylase                  |
| Nt-FLS         | AB289451.1        | ACGTTGCATGGTGTGCTACT<br>GGCAGAAGGAGGCCAAATCT                                | Flavanoid synthase                       |
| Nt-F3MO        | KJ438812.1        | GTTACCCGTTGCCACTACCA<br>GTGCCGAATAAAATCGCCA                                 | Flavonoid 3'-monooxygenase               |
| Nt-F35H        | XM_016597113      | GCCACCCACTTGGCCTATAATG<br>GTAAGTACTGAGCCTTCGCTTACAG                         | Flavonoid 3',5'-hydroxylase              |
| Nt-DFR1        | EF421429.1        | CTCTCGATGCCCAAGAACAC<br>CAGCAGAAAGGGGAATGGTTTC                              | Dihydroflavonol 4-reductase              |
| Nt-LDOX        | XM_009773928.1    | TGATCGTGTCAAGGTTTCTGGA<br>GGTTGGGGGCAATTTGGGATA                             | Leucoanthocyanidin dioxygenase           |
| Nt-UGFT        | NM_001326108.1    | GAGAAAATGAATGTCCCTGGATTGC<br>CCAATGCACTCATTGTTCCACTTTTG                     | UDP flavonoid-3-O-glucosyltransferase    |

**Supplementary Table S5. Mass spectrometric analysis of total proteins from reproductive tissues of the DK and BB grape lines.**

Data shown for replicates 1 and 2.

| Accession | Peptides | Score  | Anova (p)* | Fold | Tags | Description                                                               | Average Normalised |          |
|-----------|----------|--------|------------|------|------|---------------------------------------------------------------------------|--------------------|----------|
|           |          |        |            |      |      |                                                                           | DK                 | BB       |
| 225446080 | 120 (57) | 620.38 | 0.25       | 1.39 |      | 4-coumarate--CoA ligase 2 [Vitis vinifera]                                | 6.38E+10           | 4.59E+10 |
| 122893276 | 139 (70) | 591.99 | 0.96       | 1.06 |      | phenylalanin ammonia-lyase [Vitis vinifera]                               | 3.74E+10           | 3.51E+10 |
| 526117770 | 138 (48) | 586.88 | 0.46       | 1.38 |      | MYB5b [Vitis vinifera]                                                    | 2.84E+10           | 2.06E+10 |
| 258558776 | 111 (44) | 461.23 | 0.56       | 1.67 |      | MYBF1 [Vitis vinifera]                                                    | 1.67E+10           | 9.95E+09 |
| 731425700 | 112 (49) | 435.67 | 0.67       | 1.19 |      | PREDICTED: transcription factor MYB34-like isoform X1 [Vitis vinifera]    | 1.93E+10           | 1.62E+10 |
| 225442138 | 96 (35)  | 428.19 | 0.99       | 1.05 |      | PREDICTED: transcription factor MYB114 [Vitis vinifera]                   | 7.71E+09           | 7.36E+09 |
| 225431879 | 102 (31) | 419.91 | 0.69       | 1.15 |      | PREDICTED: transcription factor MYB12 [Vitis vinifera]                    | 1.03E+10           | 1.18E+10 |
| 526117870 | 130 (66) | 413.55 | 0.57       | 1.34 |      | chalcone synthase [Vitis vinifera]                                        | 3.59E+10           | 2.68E+10 |
| 225429662 | 109 (43) | 406.62 | 0.7        | 1.23 |      | PREDICTED: transcription factor TT2-like [Vitis vinifera]                 | 1.25E+10           | 1.01E+10 |
| 526117920 | 70 (31)  | 402.26 | 0.6        | 1.27 |      | leucoanthocyanidin dioxygenase [Vitis vinifera]                           | 1.50E+10           | 1.18E+10 |
| 526117485 | 86 (30)  | 392.88 | 0.76       | 1.05 |      | naringenin,2-oxoglutarate 3-dioxygenase [Vitis vinifera]                  | 1.22E+10           | 1.28E+10 |
| 225429672 | 103 (36) | 387.44 | 0.77       | 1.05 |      | PREDICTED: transcription factor MYB114 [Vitis vinifera]                   | 9.40E+09           | 9.89E+09 |
| 225454815 | 66 (31)  | 382.38 | 0.98       | 1.03 |      | PREDICTED: anthocyanidin 3-O-glucosyltransferase 2 [Vitis vinifera]       | 1.57E+10           | 1.53E+10 |
| 526117864 | 73 (29)  | 342.44 | 0.07       | 1.59 |      | R2R3 Myb transcription factor C2 repressor motif protein [Vitis vinifera] | 2.17E+10           | 1.37E+10 |
| 225426214 | 94 (28)  | 338.63 | 0.35       | 1.45 |      | PREDICTED: transcription repressor MYB6 [Vitis vinifera]                  | 9.04E+09           | 1.31E+10 |
| 225434329 | 88 (44)  | 336.49 | 0.45       | 1.35 |      | PREDICTED: trans-cinnamate 4-monooxygenase [Vitis vinifera]               | 1.57E+10           | 1.16E+10 |
| 731414936 | 94 (44)  | 320.46 | 0.48       | 1.42 |      | PREDICTED: transcription factor MYB46 [Vitis vinifera]                    | 1.20E+10           | 8.45E+09 |
| 225453132 | 85 (32)  | 310.25 | 0.51       | 1.32 |      | PREDICTED: transcription repressor MYB6 [Vitis vinifera]                  | 5.63E+09           | 7.44E+09 |

|                           |         |        |      |      |  |                                                                               |          |          |
|---------------------------|---------|--------|------|------|--|-------------------------------------------------------------------------------|----------|----------|
| <a href="#">225450423</a> | 73 (32) | 281.57 | 0.67 | 1.18 |  | PREDICTED: transcription factor MYB86 [Vitis vinifera]                        | 4.02E+09 | 4.73E+09 |
| <a href="#">225458725</a> | 76 (29) | 277.48 | 0.29 | 1.71 |  | PREDICTED: transcription factor MYB44-like [Vitis vinifera]                   | 1.64E+10 | 9.60E+09 |
| <a href="#">225448491</a> | 76 (22) | 270.63 | 0.68 | 1.06 |  | PREDICTED: myb-related protein B [Vitis vinifera]                             | 1.52E+10 | 1.61E+10 |
| <a href="#">297738990</a> | 80 (28) | 269.29 | 0.68 | 1.07 |  | unnamed protein product, partial [Vitis vinifera]                             | 1.07E+10 | 1.14E+10 |
| <a href="#">225446136</a> | 73 (19) | 268.5  | 0.52 | 1.5  |  | PREDICTED: myb-related protein 306 [Vitis vinifera]                           | 3.56E+09 | 5.34E+09 |
| <a href="#">225456110</a> | 75 (24) | 264.21 | 0.1  | 1.83 |  | PREDICTED: transcription repressor MYB6 isoform X1 [Vitis vinifera]           | 1.32E+10 | 7.18E+09 |
| <a href="#">225433136</a> | 61 (21) | 251.11 | 0.11 | 1.62 |  | PREDICTED: myb-related protein Myb4 [Vitis vinifera]                          | 2.72E+10 | 1.69E+10 |
| <a href="#">733214879</a> | 46 (19) | 247.92 | 1    | 1.26 |  | flavonoid methyltransferase [Vitis vinifera]                                  | 5.56E+09 | 4.41E+09 |
| <a href="#">225423967</a> | 82 (27) | 246.66 | 0.68 | 1.29 |  | PREDICTED: tetraketide alpha-pyrone reductase 2 [Vitis vinifera]              | 3.06E+10 | 2.37E+10 |
| <a href="#">526117894</a> | 50 (15) | 243.38 | 0.62 | 1.13 |  | anthocyanidin reductase [Vitis vinifera]                                      | 1.17E+10 | 1.31E+10 |
| <a href="#">225452873</a> | 64 (21) | 240.36 | 0.94 | 1.07 |  | PREDICTED: myb-related protein 306-like [Vitis vinifera]                      | 1.16E+10 | 1.08E+10 |
| <a href="#">731425941</a> | 65 (21) | 234.6  | 0.46 | 1.24 |  | PREDICTED: myb-related protein 315 isoform X1 [Vitis vinifera]                | 5.27E+09 | 6.55E+09 |
| <a href="#">526117902</a> | 63 (29) | 232.73 | 0.01 | 2.18 |  | leucoanthocyanidin reductase 1 [Vitis vinifera]                               | 1.54E+10 | 7.05E+09 |
| <a href="#">359490763</a> | 68 (39) | 230.83 | 0.93 | 1.22 |  | caffeic acid 3-O-methyltransferase [Vitis vinifera]                           | 1.28E+10 | 1.05E+10 |
| <a href="#">225470167</a> | 70 (24) | 230.22 | 0.86 | 1.13 |  | PREDICTED: transcription repressor MYB6 [Vitis vinifera]                      | 1.10E+10 | 9.70E+09 |
| <a href="#">225427431</a> | 55 (4)  | 221.57 | 0.06 | 1.96 |  | PREDICTED: transcription factor MYB113 [Vitis vinifera]                       | 3.10E+10 | 1.58E+10 |
| <a href="#">225442144</a> | 53 (22) | 215.57 | 0.29 | 1.95 |  | PREDICTED: transcription factor MYB82 [Vitis vinifera]                        | 2.10E+09 | 4.08E+09 |
| <a href="#">225461291</a> | 56 (17) | 214.78 | 0.27 | 1.3  |  | PREDICTED: transcription factor MYB39 [Vitis vinifera]                        | 6.51E+09 | 8.49E+09 |
| <a href="#">220979400</a> | 43 (4)  | 211.44 | 0.03 | 2.25 |  | R2R3 MYBA6 transcription factor splice variant 1 [Vitis vinifera]             | 8.18E+09 | 3.64E+09 |
| <a href="#">731407447</a> | 56 (17) | 210.2  | 0.84 | 1.05 |  | PREDICTED: transcription factor MYB82-like [Vitis vinifera]                   | 3.84E+09 | 4.04E+09 |
| <a href="#">526117848</a> | 53 (13) | 208.34 | 0.78 | 1.01 |  | flavonoid-related R2R3 MYB 4a repressor transcription factor [Vitis vinifera] | 6.10E+09 | 6.17E+09 |



|                           |                           |        |      |      |  |                                                                  |          |          |
|---------------------------|---------------------------|--------|------|------|--|------------------------------------------------------------------|----------|----------|
| <a href="#">526118134</a> | 61 (18)                   | 206.04 | 0.2  | 2.98 |  | R2R3 Myb30 transcription factor [Vitis vinifera]                 | 1.79E+09 | 5.34E+09 |
| <a href="#">731434687</a> | 62 (18)                   | 203.25 | 0.04 | 1.83 |  | PREDICTED: myb-related protein Myb4 [Vitis vinifera]             | 1.47E+10 | 8.00E+09 |
| <a href="#">731417479</a> | 57 (14)                   | 202.92 | 0.03 | 3    |  | PREDICTED: transcription factor MYB90-like [Vitis vinifera]      | 1.68E+10 | 5.60E+09 |
| <a href="#">731430989</a> | 50 (14)                   | 198.97 | 0.17 | 1.82 |  | PREDICTED: myb-related protein 308-like [Vitis vinifera]         | 3.95E+09 | 7.18E+09 |
| <a href="#">225427423</a> | 53 (4)                    | 197.92 | 0.06 | 1.94 |  | PREDICTED: transcription factor MYB75-like [Vitis vinifera]      | 3.02E+10 | 1.55E+10 |
| <a href="#">526117860</a> | 68 (8)                    | 197.47 | 0.05 | 1.97 |  | R2R3 Myb14 transcription factor [Vitis vinifera]                 | 6.65E+09 | 1.31E+10 |
| <a href="#">225429660</a> | 51 (12)                   | 192.05 | 0.74 | 1.06 |  | PREDICTED: transcription factor MYB3 [Vitis vinifera]            | 5.24E+09 | 5.54E+09 |
| <a href="#">526117481</a> | 28 (18)                   | 172.09 | 1    | 1.61 |  | chalcone--flavonone isomerase 2 [Vitis vinifera]                 | 2.09E+09 | 1.30E+09 |
| <a href="#">47232544</a>  | 51 (8)                    | 170.03 | 0.47 | 1.37 |  | myb-related transcription factor VvMYBA2 [Vitis vinifera]        | 6.31E+09 | 8.63E+09 |
| <a href="#">526118012</a> | 66 (34)                   | 167.84 | 0.38 | 1.83 |  | R2R3 transcription factor MYB108-like protein 2 [Vitis vinifera] | 2.24E+09 | 4.10E+09 |
| <a href="#">82623170</a>  | 48 (7)                    | 167.39 | 0.82 | 1.38 |  | transcription factor MybA [Vitis vinifera]                       | 5.80E+09 | 4.21E+09 |
| <a href="#">526117437</a> | 52 (16)                   | 162.46 | 0.28 | 1.68 |  | R2R3 MYB60 transcription factor [Vitis vinifera]                 | 4.77E+09 | 8.04E+09 |
| <a href="#">225463990</a> | 50 (14)                   | 152.45 | 0.23 | 2.16 |  | PREDICTED: transcription repressor MYB6 [Vitis vinifera]         | 1.94E+09 | 4.20E+09 |
| <a href="#">225447685</a> | 44 (6)                    | 144.47 | 0.87 | 1.01 |  | PREDICTED: transcription factor MYB39 [Vitis vinifera]           | 4.89E+09 | 4.93E+09 |
| <a href="#">526117687</a> | 31 (15)                   | 122.55 | 0.65 | 1.13 |  | leucoanthocyanidin reductase 2 [Vitis vinifera]                  | 5.47E+09 | 6.17E+09 |
| <a href="#">225445579</a> | 31 (9)                    | 120.71 | 0.6  | 1.03 |  | PREDICTED: transcription factor MYB82 [Vitis vinifera]           | 2.56E+09 | 2.64E+09 |
| <a href="#">225458515</a> | 34 (16)                   | 94.14  | 0.91 | 1.21 |  | PREDICTED: transcription factor MYB44 [Vitis vinifera]           | 3.26E+09 | 2.68E+09 |
|                           | Anova p-value $\leq 0.05$ |        |      |      |  |                                                                  |          |          |
|                           | Up-Regulated in DK        |        |      |      |  |                                                                  |          |          |
|                           | Up-Regulated in BB        |        |      |      |  |                                                                  |          |          |

**Supplementary Table S6. Mass spectrometric analysis of total proteins from reproductive tissues of the DK and RG grape lines.**

Data shown for replicates 1 and 2.

| Accession                 | Peptides | Score  | Anova (p)* | Fold  | Tags | Description                                                         | Average Normalised Abundances* |          |
|---------------------------|----------|--------|------------|-------|------|---------------------------------------------------------------------|--------------------------------|----------|
|                           |          |        |            |       |      |                                                                     | DK                             | RG       |
| <a href="#">122893276</a> | 132 (70) | 618.34 | 0.04       | 5.5   |      | phenylalanin ammonia-lyase [Vitis vinifera]                         | 4.32E+10                       | 7.84E+09 |
| <a href="#">526117770</a> | 122 (51) | 617.96 | 0.03       | 4.83  |      | MYB5b [Vitis vinifera]                                              | 3.78E+10                       | 7.81E+09 |
| <a href="#">225446080</a> | 106 (68) | 571.22 | 0.01       | 6.79  |      | 4-coumarate--CoA ligase 2 [Vitis vinifera]                          | 9.12E+10                       | 1.34E+10 |
| <a href="#">731425702</a> | 92 (50)  | 369.89 | 0.02       | 5.33  |      | PREDICTED: transcription factor MYB39-like isoform X2 [Vitis        | 1.83E+10                       | 3.43E+09 |
| <a href="#">225454815</a> | 62 (30)  | 351.79 | 0.07       | 4.42  |      | PREDICTED: anthocyanidin 3-O-glucosyltransferase 2 [Vitis vinifera] | 1.19E+10                       | 2.69E+09 |
| <a href="#">526117485</a> | 95 (46)  | 339.47 | 0.58       | 3.69  |      | naringenin,2-oxoglutarate 3-dioxygenase [Vitis vinifera]            | 1.44E+10                       | 3.89E+09 |
| <a href="#">526117870</a> | 106 (67) | 327.87 | 0.02       | 10.92 |      | chalcone synthase [Vitis vinifera]                                  | 5.33E+10                       | 4.88E+09 |
| <a href="#">225431879</a> | 79 (40)  | 324.26 | 0.7        | 3.27  |      | PREDICTED: transcription factor MYB12 [Vitis vinifera]              | 9.26E+09                       | 2.83E+09 |
| <a href="#">59939328</a>  | 76 (45)  | 314.82 | 0.02       | 7.6   |      | dihydroflavonol 4-reductase [Vitis vinifera]                        | 4.74E+10                       | 6.24E+09 |
| <a href="#">258558776</a> | 82 (42)  | 300.53 | 0.03       | 5.19  |      | MYBF1 [Vitis vinifera]                                              | 6.85E+09                       | 1.32E+09 |
| <a href="#">225458725</a> | 76 (39)  | 282.35 | 0.07       | 5.3   |      | PREDICTED: transcription factor MYB44-like [Vitis vinifera]         | 2.29E+10                       | 4.31E+09 |
| <a href="#">225434329</a> | 69 (34)  | 270.81 | 0.06       | 5.4   |      | PREDICTED: trans-cinnamate 4-monooxygenase [Vitis vinifera]         | 2.35E+10                       | 4.35E+09 |
| <a href="#">225429672</a> | 74 (36)  | 269.47 | 0.29       | 2.99  |      | PREDICTED: transcription factor MYB114 [Vitis vinifera]             | 7.08E+09                       | 2.37E+09 |
| <a href="#">225442138</a> | 61 (28)  | 265.85 | 0.1        | 5.87  |      | PREDICTED: transcription factor MYB114 [Vitis vinifera]             | 6.51E+09                       | 1.11E+09 |
| <a href="#">526117902</a> | 54 (31)  | 253    | 0.02       | 5.89  |      | leucoanthocyanidin reductase 1 [Vitis vinifera]                     | 1.96E+10                       | 3.33E+09 |

|                           |         |        |          |       |  |                                                                               |          |          |
|---------------------------|---------|--------|----------|-------|--|-------------------------------------------------------------------------------|----------|----------|
| <a href="#">225448491</a> | 70 (41) | 247.02 | 0.01     | 11.26 |  | PREDICTED: myb-related protein B [Vitis vinifera]                             | 2.22E+10 | 1.98E+09 |
| <a href="#">526117864</a> | 54 (30) | 244.53 | 0.03     | 5.09  |  | R2R3 Myb transcription factor C2 repressor motif protein [Vitis vinifera]     | 3.28E+10 | 6.44E+09 |
| <a href="#">225423967</a> | 64 (25) | 240.21 | 0.25     | 5.19  |  | PREDICTED: tetraketide alpha-pyrone reductase 2 [Vitis vinifera]              | 2.89E+10 | 5.57E+09 |
| <a href="#">297738990</a> | 60 (26) | 229.32 | 0.57     | 2.75  |  | unnamed protein product, partial [Vitis vinifera]                             | 4.85E+09 | 1.76E+09 |
| <a href="#">526117920</a> | 61 (33) | 224.8  | 0.03     | 4.13  |  | leucoanthocyanidin dioxygenase [Vitis vinifera]                               | 1.22E+10 | 2.95E+09 |
| <a href="#">225470167</a> | 69 (36) | 204.9  | 0.06     | 2.74  |  | PREDICTED: transcription repressor MYB6 [Vitis vinifera]                      | 8.60E+09 | 3.13E+09 |
| <a href="#">731386250</a> | 55 (30) | 202.33 | 0.89     | 1.59  |  | PREDICTED: transcription factor MYB44-like [Vitis vinifera]                   | 2.08E+09 | 1.31E+09 |
| <a href="#">526117894</a> | 46 (15) | 199.69 | 0.07     | 3.91  |  | anthocyanidin reductase [Vitis vinifera]                                      | 1.87E+10 | 4.79E+09 |
| <a href="#">225462046</a> | 57 (30) | 198.49 | 0.01     | 2.03  |  | PREDICTED: transcription repressor MYB4 [Vitis vinifera]                      | 2.77E+09 | 1.36E+09 |
| <a href="#">526117359</a> | 36 (11) | 193.43 | 0.05     | 10.93 |  | uncharacterized protein LOC100265568 [Vitis vinifera]                         | 5.70E+10 | 5.22E+09 |
| <a href="#">359490763</a> | 53 (32) | 192.51 | 0.12     | 12.75 |  | caffeic acid 3-O-methyltransferase [Vitis vinifera]                           | 3.41E+10 | 2.67E+09 |
| <a href="#">733214879</a> | 39 (17) | 189.45 | 0.08     | 3.33  |  | flavonoid methyltransferase [Vitis vinifera]                                  | 5.11E+09 | 1.53E+09 |
| <a href="#">526117848</a> | 48 (26) | 183.57 | 0.57     | 1.08  |  | flavonoid-related R2R3 MYB 4a repressor transcription factor [Vitis vinifera] | 3.52E+09 | 3.79E+09 |
| <a href="#">526117764</a> | 53 (15) | 182.52 | 0.26     | 1.72  |  | Myb transcription factor [Vitis vinifera]                                     | 7.04E+09 | 4.08E+09 |
| <a href="#">225442142</a> | 43 (19) | 169.61 | 6.24E-03 | 8.24  |  | PREDICTED: myb-related protein Zm38 [Vitis vinifera]                          | 8.85E+09 | 1.07E+09 |
| <a href="#">731407447</a> | 50 (20) | 168.83 | 0.18     | 2.95  |  | PREDICTED: transcription factor MYB82-like [Vitis vinifera]                   | 4.84E+09 | 1.64E+09 |
| <a href="#">225446136</a> | 49 (25) | 167.46 | 0.5      | 4.22  |  | PREDICTED: myb-related protein 306 [Vitis vinifera]                           | 8.02E+09 | 1.90E+09 |
| <a href="#">526118134</a> | 42 (20) | 159.21 | 0.3      | 1.86  |  | R2R3 Myb30 transcription factor [Vitis vinifera]                              | 1.41E+09 | 2.62E+09 |
| <a href="#">526118012</a> | 50 (32) | 155.37 | 0.88     | 2.08  |  | R2R3 transcription factor MYB108-like protein 2 [Vitis vinifera]              | 3.60E+09 | 1.73E+09 |
| <a href="#">731434687</a> | 44 (26) | 147.77 | 0.23     | 9     |  | PREDICTED: myb-related protein Myb4 [Vitis vinifera]                          | 6.76E+09 | 7.52E+08 |
| <a href="#">225429660</a> | 43 (20) | 147.45 | 0.18     | 1.68  |  | PREDICTED: transcription factor MYB3 [Vitis vinifera]                         | 1.58E+09 | 9.45E+08 |

|                  |         |        |          |       |                                                                                   |                                                                   |          |          |
|------------------|---------|--------|----------|-------|-----------------------------------------------------------------------------------|-------------------------------------------------------------------|----------|----------|
| <u>220979400</u> | 22 (6)  | 142.87 | 6.83E-03 | 22.32 |  | R2R3 MYBA6 transcription factor splice variant 1 [Vitis vinifera] | 1.54E+10 | 6.89E+08 |
| <u>359491528</u> | 26 (16) | 139.18 | 4.04E-03 | 11.1  |  | PREDICTED: transcription factor WER [Vitis vinifera]              | 1.75E+10 | 1.58E+09 |
| <u>731422987</u> | 41 (22) | 138.42 | 0.13     | 2.43  |  | PREDICTED: transcription factor MYB76-like [Vitis vinifera]       | 5.96E+09 | 2.45E+09 |
| <u>731430989</u> | 36 (19) | 133.28 | 0.27     | 1.47  |  | PREDICTED: myb-related protein 308-like [Vitis vinifera]          | 1.06E+09 | 1.55E+09 |
| <u>526117481</u> | 19 (16) | 118.91 | 0.74     | 2.16  |  | chalcone--flavonone isomerase 2 [Vitis vinifera]                  | 4.33E+08 | 2.00E+08 |
| <u>225426160</u> | 31 (14) | 101.39 | 0.2      | 4.36  |  | PREDICTED: transcription factor MYB86 [Vitis vinifera]            | 4.33E+09 | 9.93E+08 |
| <u>225458515</u> | 25 (8)  | 85.72  | 0.09     | 2.6   |  | PREDICTED: transcription factor MYB44 [Vitis vinifera]            | 3.52E+09 | 1.35E+09 |
| <u>359481933</u> | 21 (8)  | 65.84  | 0.01     | 1.71  |  | PREDICTED: myb-related protein 305 [Vitis vinifera]               | 5.45E+08 | 3.18E+08 |

|                                                                                   |                      |
|-----------------------------------------------------------------------------------|----------------------|
|  | Anova p-value ≤ 0.05 |
|  | Up-Regulated in DK   |
|  | Up-Regulated in RG   |

**Supplemental Data Set 1. Differently expressed genes among the fruit peel samples.**

| <b>Gene</b>  | <b>BB</b> | <b>RG</b> | <b>DK</b> |
|--------------|-----------|-----------|-----------|
| LOC100266436 | 0.705335  | 7.63774   | 5.0651    |
| LOC100262788 | 7.44834   | 1.27224   | 13.1086   |
| LOC100260982 | 0.610214  | 2.69349   | 1.00309   |
| LOC100266262 | 1.01993   | 3.39478   | 19.9158   |
| LOC100244000 | 10.1089   | 17.6016   | 3.42321   |
| LOC100250897 | 9.70933   | 1.38073   | 5.16004   |
| LOC100242416 | 5.16697   | 2.26075   | 15.8756   |
| LOC100267908 | 9.72115   | 0         | 7.1535    |
| LOC100247541 | 0         | 1.80822   | 0.915275  |
| LOC104878923 | 0         | 0.315968  | 2.79837   |
| LOC100264480 | 0.470762  | 0.197464  | 2.72149   |
| LOC100262843 | 0.812207  | 7.89362   | 2.60331   |
| LOC100257723 | 6.1814    | 38.4813   | 11.6641   |
| LOC100247480 | 0.0267809 | 0.502039  | 2.6676    |
| LOC100262991 | 11.7424   | 3.70619   | 19.8437   |
| LOC100247323 | 2.31303   | 10.0671   | 4.16889   |
| LOC100259502 | 1.6021    | 7.78343   | 1.60541   |
| LOC100245576 | 2.14893   | 23.2352   | 12.901    |
| LOC100262836 | 0.184064  | 0.284214  | 1.33347   |
| LOC100259291 | 27.9309   | 7.48996   | 31.3999   |
| LOC100261188 | 6.52122   | 36.4914   | 14.9042   |
| LOC100254317 | 5.94301   | 21.5939   | 85.9236   |
| MYBC2-L1     | 91.9737   | 25.6615   | 21.4527   |
| LOC100252471 | 0.81758   | 3.00402   | 11.2943   |
| LOC100254219 | 1.90535   | 1.16208   | 14.2546   |
| LOC100262819 | 3.98116   | 6.49345   | 92.7793   |
| LOC100257690 | 2.35022   | 11.8055   | 0.343878  |
| LOC100233130 | 0.321283  | 5.38743   | 4.28599   |
| LOC100257722 | 7.85896   | 0.452436  | 0.104891  |
| LOC100244068 | 0.0318079 | 0         | 3.68011   |
| LOC100242302 | 9.42148   | 5.33232   | 48.4306   |
| LOC100249075 | 0.287389  | 6.40002   | 1.78866   |
| LOC100264465 | 0.659215  | 0.334561  | 3.75502   |
| LOC100267978 | 0.486017  | 2.01757   | 3.09079   |
| LOC100260250 | 16.9115   | 28.667    | 6.84745   |
| LOC100251695 | 8.33376   | 6.48855   | 28.3738   |
| LOC100854095 | 0.218881  | 5.993     | 6.0745    |
| LOC100258559 | 0.427736  | 0.310934  | 5.366     |
| LOC100267261 | 0.272038  | 0.616198  | 1.52949   |
| LOC100248463 | 2.02143   | 5.51306   | 1.34461   |
| LOC100253486 | 6.47467   | 20.7873   | 35.632    |
| LOC100246738 | 5.49167   | 1.19973   | 2.62183   |
| LOC100253576 | 84.5552   | 6.50611   | 11.8214   |

|                           |          |           |           |
|---------------------------|----------|-----------|-----------|
| LOC100258696              | 10.8022  | 296.262   | 320.131   |
| LOC100262076              | 0.66063  | 12.2938   | 1.78401   |
| LOC100249919              | 0        | 1.41493   | 0.949016  |
| LOC100248178              | 0.318824 | 3.42047   | 0.70841   |
| LOC100255708              | 0.434778 | 16.9344   | 33.6122   |
| LOC104880116              | 0.614637 | 3.95417   | 0.178043  |
| LOC100249622              | 17.8773  | 34.105    | 3.89925   |
| LOC104880138              | 0.698353 | 2.81005   | 2.23173   |
| LOC100258240              | 8.15305  | 20.1652   | 40.3096   |
| LOC100251346              | 0.186554 | 1.24701   | 0.0643737 |
| LOC100253093              | 2.32928  | 0.482264  | 0.454602  |
| LOC100249555              | 1.26317  | 8.63856   | 6.24387   |
| LOC100266692              | 0.431815 | 1.56459   | 0.341438  |
| LOC104880233              | 0.84408  | 5.1681    | 2.89695   |
| LOC100254591              | 7.05244  | 0.468504  | 1.81201   |
| LOC100257993              | 2.31131  | 0.591953  | 3.026     |
| LOC100245965              | 1.14623  | 4.72084   | 5.25557   |
| LOC100266558              | 0.397681 | 3.82395   | 0.377181  |
| LOC100259590              | 1.23357  | 46.1304   | 8.831     |
| LOC100264769              | 14.4282  | 22.9798   | 5.03845   |
| LOC104880458              | 685.651  | 21.2517   | 81.0167   |
| LOC104880461              | 287.681  | 15.0745   | 27.6672   |
| LOC100259595              | 2.78047  | 0.276111  | 0.924758  |
| LOC100242487,LOC100264777 | 4.13316  | 0.594622  | 0.693062  |
| LOC100252727              | 0.683288 | 0.0745059 | 1.75348   |
| LOC100244331,LOC100249476 | 4.7921   | 0.878414  | 0.233091  |
| LOC100254585              | 1.11608  | 4.07387   | 0.709226  |
| LOC100249487              | 1.91023  | 0.0897981 | 0         |
| LOC100263123              | 0        | 1.28049   | 0.198113  |
| LOC104880513              | 0        | 14.234    | 3.2228    |
| LOC104880515              | 0.244828 | 3.19256   | 0.834038  |
| LOC104880521              | 0        | 11.5144   | 4.2211    |
| LOC100259196              | 0.821702 | 8.5499    | 3.96914   |
| FAOMT                     | 50.7872  | 14.0773   | 0         |
| LOC100853551              | 1.18208  | 2.61709   | 0.515779  |
| LOC104880633              | 0.180888 | 0.286073  | 3.70292   |
| LOC100245367              | 64.0533  | 0.628288  | 55.6353   |
| LOC100854734              | 4.086    | 0         | 1.09949   |
| LOC100855410              | 4.74548  | 1.07056   | 1.88597   |
| LOC100248984              | 29.1151  | 5.8612    | 37.0113   |
| LOC100250476              | 7.15836  | 7.19608   | 1.6806    |
| LOC100245345              | 50.2636  | 12.4169   | 26.3835   |
| LOC100267772              | 0.214282 | 3.06504   | 1.46398   |
| LOC100232906              | 4.0633   | 1.39163   | 10.2805   |
| LOC104879282              | 5.35417  | 10.6933   | 27.3055   |
| LOC100259322,LOC100264496 | 53.8989  | 1.41598   | 40.8874   |
| BG1                       | 1.09744  | 6.89177   | 0.13962   |

|                           |           |           |           |
|---------------------------|-----------|-----------|-----------|
| LOC100254419,LOC104877428 | 1.74399   | 4.207     | 0.766423  |
| LOC100250979              | 55.7516   | 4.08746   | 21.43     |
| LOC100247487,LOC100264700 | 43.3497   | 28.4563   | 184.946   |
| LOC100266416              | 14.0647   | 34.3978   | 4.29508   |
| LOC104878973              | 6.16256   | 0         | 5.11864   |
| LOC104878972              | 1.47432   | 0         | 0.0731115 |
| LOC104878965              | 0.50941   | 0         | 2.59464   |
| LOC104879340              | 0.598067  | 3.20685   | 0.400362  |
| LOC100257577              | 8.37591   | 28.6989   | 145.603   |
| LOC100852498              | 0.342579  | 1.83437   | 0         |
| LOC100250961              | 1.69944   | 0.53881   | 10.9676   |
| LOC100257863              | 0.198009  | 9.34087   | 0.0848397 |
| LOC100249076              | 1.75102   | 1.17185   | 5.67351   |
| LOC100261252              | 0.273218  | 1.01988   | 1.28386   |
| LOC100267893              | 0.237562  | 1.89339   | 1.67669   |
| LOC100252491              | 0.338261  | 0.334924  | 3.68057   |
| LOC104882357              | 2.42403   | 0.241421  | 0.300285  |
| LOC100262736              | 10.5047   | 0.233435  | 0.0924202 |
| LOC104881294              | 1.02261   | 3.22973   | 0.760343  |
| LOC100257750              | 0.519757  | 8.68785   | 0.806428  |
| LOC100252699              | 1.58065   | 7.43383   | 9.99499   |
| LOC100250994              | 0.177094  | 1.06313   | 0.0861047 |
| LOC100256086              | 1.55499   | 0         | 0.417404  |
| LOC100264640              | 6.78385   | 1.82049   | 1.6594    |
| LOC100259463              | 0.563837  | 63.8852   | 75.2458   |
| LOC100249254              | 0.247092  | 3.2441    | 2.71411   |
| LOC100247446              | 0.372665  | 2.91184   | 0.580654  |
| LOC104879119              | 3.48323   | 0.0547375 | 0         |
| LOC100261163              | 34.9411   | 18.481    | 7.24793   |
| LOC100266415              | 0         | 20.9277   | 2.70591   |
| LOC100242453              | 70.995    | 59.8831   | 13.2192   |
| LOC100242197              | 8.69814   | 0.912508  | 22.7906   |
| LOC100266215              | 0.77432   | 6.73371   | 2.43384   |
| LOC100244027              | 7.96589   | 50.8476   | 18.6684   |
| LOC104877321              | 3.10482   | 0.21276   | 6.26538   |
| LOC100261157              | 0.0663428 | 8.89209   | 0.390233  |
| LOC104879692              | 4.39405   | 14.2215   | 21.2255   |
| LOC100249925              | 5.0072    | 6.12686   | 23.2318   |
| LOC100251624              | 3.17534   | 1.55887   | 0.62815   |
| LOC100248190              | 1.36627   | 14.9622   | 15.4372   |
| LOC104879657              | 0.529841  | 4.57653   | 23.9464   |
| LOC100244715              | 1.15198   | 9.69992   | 19.1849   |
| LOC104879710              | 15.5446   | 25.4422   | 203.874   |
| LOC100852822              | 26.0847   | 11.618    | 129.082   |
| LOC100852797              | 2.88586   | 52.4261   | 30.9517   |
| LOC100852697              | 1.64952   | 13.6371   | 5.84636   |
| LOC104880029              | 1.26083   | 0.0968425 | 12.0923   |

|                                          |           |          |           |
|------------------------------------------|-----------|----------|-----------|
| LOC100263777                             | 2.43031   | 2.77271  | 27.2027   |
| LOC100243241                             | 4.7687    | 1.04136  | 0.672238  |
| LOC100244964                             | 2.04392   | 36.1884  | 18.7096   |
| LOC100854597                             | 2.40654   | 22.8838  | 4.6407    |
| LOC100255341                             | 0.301549  | 2.2762   | 1.6738    |
| LOC100246832                             | 3.25224   | 20.6783  | 58.5432   |
| LOC100250071                             | 3.27966   | 0.405761 | 1.25199   |
| LOC100253553                             | 0.0455985 | 4.38011  | 1.05961   |
| LOC100246639                             | 3.64623   | 13.1416  | 15.9125   |
| LOC100241332                             | 13.8193   | 2.85357  | 59.9502   |
| LOC100260247                             | 1.16919   | 0.92112  | 4.4589    |
| LOC100258541                             | 15.016    | 49.9233  | 71.1235   |
| LOC100255052                             | 0.174589  | 0.783359 | 1.80821   |
| LOC100262011                             | 69.517    | 10.3321  | 52.2787   |
| LOC100241338                             | 1.94605   | 10.6876  | 2.85797   |
| LOC100256507                             | 1.69948   | 18.2982  | 33.1126   |
| LOC100263380                             | 0         | 1.79347  | 0.0461411 |
| LOC100266718                             | 0.170976  | 1.13817  | 2.5438    |
| LOC100261517                             | 0.520767  | 1.08631  | 3.80298   |
| LOC104880653                             | 0.418808  | 0.530404 | 2.02603   |
| LOC100258158                             | 10.8228   | 25.4874  | 57.8017   |
| LOC100259859                             | 34.6109   | 8.93454  | 80.4088   |
| LOC100265010                             | 0.286872  | 1.75237  | 1.24292   |
| LOC100243095                             | 1.23701   | 5.12624  | 3.87167   |
| LOC100251075,LOC100265393,LOC100855072,L | 1.05238   | 2.97598  | 5.67055   |
| LOC100249479                             | 7.34276   | 9.97731  | 30.0731   |
| LOC100259700                             | 2.48097   | 0        | 0         |
| LOC100242603                             | 453.184   | 3326.46  | 2405.25   |
| LOC100251079                             | 1.01385   | 0.36233  | 2.1639    |
| LOC100240962                             | 8.13043   | 33.1629  | 26.4798   |
| LOC100261435                             | 1.66512   | 5.30321  | 1.20462   |
| LOC100259604                             | 12.8112   | 5.79566  | 1.21695   |
| LOC100264777                             | 4813.97   | 210.37   | 1531.35   |
| LOC100251213                             | 0.132114  | 1.89419  | 0.316536  |
| LOC104880508,LOC104880714                | 0.570185  | 7.86979  | 0.645676  |
| LOC100855198                             | 0         | 3.31219  | 0.308215  |
| LOC100855337                             | 0.192426  | 1.15949  | 1.0636    |
| LOC100242071                             | 0.100964  | 9.29311  | 2.11793   |
| LOC100241971                             | 0.0427322 | 1.41704  | 0.323758  |
| LOC100245446                             | 12.2126   | 2.92386  | 8.25262   |
| LOC100243827                             | 70.2265   | 4.60184  | 8.36275   |
| LOC104880823                             | 51.0987   | 239.415  | 317.276   |
| LOC100264403                             | 0.521016  | 14.4642  | 1.09397   |
| LOC100257506                             | 0.921822  | 6.23208  | 0.721281  |
| LOC100266047                             | 0.424076  | 1.85284  | 0.623246  |
| LOC104880871                             | 0.118871  | 0.585953 | 1.6585    |
| LOC100242104                             | 32.7271   | 8.6495   | 37.5181   |



|                           |          |           |           |
|---------------------------|----------|-----------|-----------|
| LOC100248869              | 0.651528 | 0.524758  | 15.8969   |
| LOC100255664              | 49.849   | 30.2969   | 7.77727   |
| LOC100262614              | 1.04204  | 5.09673   | 0.327668  |
| LOC100264381              | 0.776295 | 3.16814   | 7.51147   |
| LOC100248590              | 14.2926  | 465.956   | 80.9019   |
| LOC100253692              | 0        | 4.07304   | 0.660643  |
| LOC100250303              | 1.63432  | 8.92094   | 0.941433  |
| LOC100241922              | 1.54171  | 6.45154   | 5.85798   |
| LOC100252176              | 9.86102  | 3.56252   | 23.7767   |
| LOC100241814              | 136.545  | 14.7563   | 316.014   |
| LOC100252079              | 0.281778 | 1.28734   | 0.883768  |
| LOC100262309              | 5.63382  | 1.62699   | 7.75184   |
| LOC100855171              | 0.62888  | 2.19105   | 5.82343   |
| LOC100243417              | 0.460617 | 2.22016   | 1.92138   |
| LOC100252168              | 106.208  | 25.5569   | 73.9122   |
| LOC100267564              | 7.5551   | 3.17119   | 17.8443   |
| LOC100250388              | 9.24473  | 9.99172   | 0.743246  |
| LOC104880486              | 11.1718  | 0.0438842 | 0.402534  |
| LOC100266966              | 0.58826  | 3.26792   | 1.01086   |
| LOC100251542              | 0.500982 | 0.696428  | 2.66369   |
| CIPK16                    | 15.5799  | 3.7586    | 1.64819   |
| LOC100261772              | 2.92404  | 8.18324   | 12.9576   |
| LOC100244635              | 3.40019  | 10.177    | 18.3905   |
| LOC100249702              | 0.969506 | 1.88255   | 0.419367  |
| LOC104880544              | 0        | 1.93739   | 0.163201  |
| LOC100246406              | 3.26051  | 28.0026   | 5.54496   |
| LOC100244640              | 17.9486  | 4.98678   | 4.45071   |
| LOC104880494              | 29.5945  | 12.9741   | 4.55008   |
| LOC100241193              | 1.97834  | 4.07043   | 41.1505   |
| LOC100251456              | 4.49462  | 0.397387  | 3.17568   |
| LOC100256593              | 0.799549 | 1.05315   | 9.25984   |
| LOC100261690              | 0.857327 | 4.55455   | 9.94783   |
| LOC100852589              | 0.399784 | 3.50712   | 0.286312  |
| LOC100260638              | 1.47284  | 0.243022  | 0.0713791 |
| LOC100257300              | 0.711759 | 5.40906   | 3.86222   |
| LOC100262345              | 3.29286  | 0.340389  | 1.43259   |
| LOC100241745              | 35.6697  | 11.2492   | 168.899   |
| LOC104880558              | 1.19148  | 0.323717  | 0         |
| SIRK                      | 8.05694  | 1.4355    | 6.38583   |
| LOC100257299              | 0        | 0         | 2.18223   |
| LOC100855345              | 0        | 0.127211  | 1.25152   |
| LOC100251443              | 0        | 0.0383096 | 1.40201   |
| LOC104880522              | 1.83416  | 9.59006   | 0.112084  |
| LOC104880524              | 0.03753  | 10.2472   | 0.134102  |
| LOC100241242,LOC104880527 | 0.701226 | 3.13239   | 1.97219   |
| LOC100268068              | 1.20623  | 0.261349  | 0         |
| LOC104877376              | 2.38465  | 0.376634  | 0         |

|                           |          |           |           |
|---------------------------|----------|-----------|-----------|
| LOC100266188              | 0        | 1.00061   | 0.205055  |
| LOC100249172              | 1.32398  | 8.9133    | 3.03438   |
| LOC100257624              | 90.9052  | 48.686    | 259.715   |
| LOC104880575              | 0.839946 | 1.13917   | 0.236633  |
| LOC100254590              | 3.97856  | 0.328667  | 1.19379   |
| LOC104880589              | 0        | 4.55949   | 10.4332   |
| LOC104880612              | 0        | 4.02066   | 0         |
| LOC100261161              | 0.957204 | 0.42622   | 2.09694   |
| LOC100247588              | 0.396146 | 4.01051   | 3.49156   |
| LOC100257214              | 0.161811 | 2.5968    | 0.138395  |
| LOC100854884              | 65.2531  | 171.972   | 26.2983   |
| LOC104880466              | 2.4047   | 1.79346   | 10.011    |
| LOC100252054              | 0.672289 | 0.372896  | 3.04152   |
| LOC100247041              | 0.176839 | 0.626222  | 8.95886   |
| LOC100243529              | 1.59478  | 2.3303    | 0.302559  |
| LOC100248671              | 10.2386  | 3.90593   | 1.65432   |
| LOC100258905              | 0.216074 | 1.15978   | 0.684526  |
| LOC100246932              | 3.29154  | 1.43786   | 31.4807   |
| LOC100260637              | 5.71448  | 8.71684   | 1.17045   |
| LOC100265219              | 0.146173 | 5.72702   | 0.52623   |
| LOC100258410              | 3.43928  | 1.29623   | 13.4215   |
| LOC100256680              | 1.18606  | 5.34188   | 1.93464   |
| LOC100265230              | 1.5995   | 8.28955   | 26.1322   |
| CIPK16                    | 34.0813  | 10.0857   | 3.42852   |
| LOC100259946              | 2.398    | 3.23189   | 23.5283   |
| LOC100247046              | 9.92978  | 57.1104   | 29.4085   |
| LOC100265897              | 29.0939  | 0         | 0.0841989 |
| LOC100253669              | 4.88902  | 3.79302   | 20.0733   |
| LOC100249766              | 0.300623 | 0.822414  | 1.58371   |
| LOC104880528              | 2.99723  | 6.4025    | 12.0051   |
| LOC104880531              | 0.855181 | 0.623191  | 2.61141   |
| LOC100262778              | 0.230106 | 0.0669281 | 1.17202   |
| LOC100247713              | 0.346614 | 0.295837  | 4.15978   |
| LOC100259563              | 9.62063  | 0.318576  | 3.60403   |
| LOC100256223              | 40.2128  | 5.69477   | 13.4215   |
| LOC100245970              | 7.38921  | 28.6876   | 32.2179   |
| LOC100266562              | 0.312933 | 1.34028   | 0.160284  |
| LOC100254492              | 0.419383 | 10.2802   | 1.24675   |
| LOC100247995              | 0.89461  | 3.79374   | 0.553984  |
| LOC100242940              | 0.399763 | 11.46     | 14.9627   |
| LOC100241201,LOC100263475 | 0.879489 | 5.18564   | 3.10772   |
| LOC100251568              | 0.190924 | 2.04476   | 0.27831   |
| LOC104880605              | 0.871462 | 2.32514   | 4.23486   |
| LOC104880619              | 1.06056  | 0.238405  | 1.94291   |
| LOC104880620              | 23.5895  | 3.62874   | 6.95055   |
| LOC100245658              | 0        | 0.922777  | 1.55614   |
| LOC100249279              | 18.3431  | 78.9565   | 104.197   |

|                           |          |           |           |
|---------------------------|----------|-----------|-----------|
| LOC100267888              | 28.8743  | 26.4611   | 145.941   |
| LOC100247370              | 5.04041  | 29.6178   | 17.001    |
| LOC100243962,LOC100268126 | 11.0397  | 1.03615   | 8.32085   |
| LOC100250788,LOC100254375 | 2.53889  | 0.402942  | 0.583416  |
| LOC100256088              | 5.88768  | 2.25134   | 9.29028   |
| LOC100261078              | 0.334397 | 3.62196   | 3.09579   |
| LOC100249054              | 0.503559 | 0.608259  | 2.89408   |
| LOC100266364              | 7.65621  | 11.1207   | 2.73673   |
| LOC100256142              | 2.04388  | 0.11518   | 0         |
| LOC100268094              | 9.71096  | 0.0243778 | 2.02468   |
| LOC100268013              | 1.12294  | 0.837115  | 6.87943   |
| LOC100853379              | 0.616433 | 16.3092   | 5.89097   |
| LOC104880640              | 0.704209 | 4.69461   | 0.721658  |
| LOC100249096              | 0.761358 | 14.6486   | 10.5705   |
| LOC100247563              | 2.33565  | 1.50213   | 0.376706  |
| LOC100242430              | 0.272628 | 2.16882   | 0.325661  |
| PMT2                      | 1.46469  | 0.236179  | 0.54911   |
| LOC104880645              | 0.26687  | 0.334682  | 1.24392   |
| LOC104880676              | 11.4375  | 2.12595   | 1.98597   |
| LOC100257654              | 833.564  | 95.999    | 134.014   |
| LOC100259389              | 7.10539  | 31.6719   | 26.4877   |
| LOC100254268              | 0.304864 | 1.50293   | 1.48402   |
| LOC100266419              | 19.407   | 54.2489   | 157.536   |
| LOC100262921              | 0        | 0.298161  | 1.96105   |
| LOC100250892              | 0.184911 | 1.50603   | 1.23421   |
| LOC100854061              | 3.06918  | 12.0183   | 2.17156   |
| LOC100245678              | 2.07269  | 0.414308  | 0.449277  |
| LOC100264626              | 200.119  | 49.0802   | 337.056   |
| LOC100249240              | 33.5835  | 11.7912   | 6.03889   |
| LOC100247542              | 1.30549  | 0.905454  | 0         |
| LOC100255957              | 35.2651  | 9.00316   | 4.139     |
| LOC100257716              | 57.2845  | 14.0545   | 7.75702   |
| LOC100249959              | 55.1468  | 27.4067   | 125.459   |
| LOC104880694              | 0.19412  | 1.24507   | 0.974036  |
| LOC100265544              | 0.657656 | 0.406178  | 1.9316    |
| LOC100258760              | 1.25892  | 0.940885  | 9.01388   |
| LOC100267270              | 2.27616  | 0.116164  | 0.0299947 |
| LOC100262220              | 0.59864  | 0.412425  | 1.83282   |
| LOC100248411              | 127.116  | 38.058    | 188.221   |
| CYP716A17                 | 7.28184  | 0.0805484 | 0.339988  |
| CYP716A15                 | 48.3151  | 104.773   | 238.914   |
| LOC100258651              | 3.09203  | 0.837529  | 0.577337  |
| LOC104880763              | 1.25036  | 5.0936    | 8.114     |
| LOC100258430              | 0.57798  | 2.42652   | 3.17589   |
| LOC104880731              | 12.1548  | 1.05781   | 0.799281  |
| LOC100251539              | 6.03023  | 1.21651   | 0.167775  |
| LOC104880778              | 0.931251 | 3.79069   | 1.28583   |

|                           |          |          |           |
|---------------------------|----------|----------|-----------|
| LOC100243678              | 1.0887   | 6.40717  | 7.10483   |
| LOC100252308              | 0        | 1.39209  | 0.0866598 |
| LOC104880766              | 3.14476  | 19.1411  | 4.61077   |
| LOC100254783              | 61.2708  | 16.6236  | 14.4406   |
| LOC104880790              | 0.623457 | 3.32986  | 0.264712  |
| LOC104880788              | 13.6177  | 2.87585  | 13.104    |
| LOC100251303              | 18.9389  | 39.6561  | 129.357   |
| LOC100246166              | 2.79608  | 3.51192  | 12.813    |
| LOC100258257              | 1.32674  | 8.45909  | 7.89499   |
| LOC100252949              | 3.16138  | 0.591505 | 2.48047   |
| LOC100854235              | 0.12929  | 2.15938  | 0.287779  |
| LOC100247930              | 0.906718 | 1.72862  | 3.74246   |
| LOC100247834              | 68.8951  | 1.14043  | 0.670005  |
| LOC100264662              | 0.105696 | 0.434513 | 5.98187   |
| GER6                      | 2.53252  | 10.4628  | 18.0275   |
| LOC100242235              | 10.6485  | 8.00689  | 2.37668   |
| LOC100264512              | 0.253261 | 0        | 1.3588    |
| LOC100254150,LOC104880627 | 1.87338  | 0.361862 | 0         |
| LOC100261010              | 0.517968 | 2.48065  | 1.22206   |
| LOC100264596,LOC104880628 | 0.104833 | 0        | 4.01827   |
| LOC100254298              | 4.89265  | 0.131791 | 2.00401   |
| LECY1                     | 5.83742  | 0.532157 | 2.73568   |
| LOC100245780              | 0.894858 | 1.87143  | 4.65665   |
| LOC100242449              | 0.701083 | 4.73393  | 4.99782   |
| LOC100247359              | 14.1683  | 13.2134  | 57.1517   |
| LOC100242363              | 3.97003  | 3.17669  | 18.9967   |
| LOC100249036              | 34.3655  | 20.4307  | 151.987   |
| LOC100264581              | 0        | 0.209027 | 2.07464   |
| LOC100247495              | 30.3408  | 6.07047  | 17.8257   |
| LOC100245766              | 1.25693  | 0.119625 | 0.0529027 |
| LOC100266427              | 0.868164 | 3.688    | 4.34733   |
| LOC100252531              | 1.08122  | 6.0901   | 11.4389   |
| LOC100264574,LOC100268163 | 3.82924  | 3.45142  | 21.1315   |
| LOC100268083              | 25.053   | 0.750253 | 2.42257   |
| LOC100254204              | 0.964368 | 14.0719  | 9.05231   |
| LOC100260990              | 19.0273  | 77.3419  | 9.38827   |
| LOC100255911              | 1.60731  | 12.4106  | 0.723514  |
| LOC100250904              | 0.983795 | 0.617049 | 7.87504   |
| LOC100266175              | 0.110191 | 1.16042  | 0.193434  |
| LOC100267909              | 0        | 1.48647  | 0.0464567 |
| LOC100853647              | 0.202344 | 0.204089 | 3.9313    |
| LOC100243923              | 29.0741  | 57.4158  | 8.86519   |
| LOC100268054              | 0.614835 | 24.6739  | 1.39686   |
| LOC100249232              | 32.4619  | 79.1308  | 16.6881   |
| LOC100248934              | 2.9733   | 0.171222 | 0.945171  |
| LOC100247195              | 131.364  | 0.121115 | 0         |
| LOC100249966              | 13.3909  | 9.18828  | 2.42002   |

|                           |           |           |           |
|---------------------------|-----------|-----------|-----------|
| LOC100267134              | 13.8102   | 16.3294   | 60.9818   |
| LOC104880688              | 14.7417   | 8.78033   | 42.9445   |
| LOC100243222              | 1.24986   | 6.13548   | 5.27706   |
| LOC100255413              | 0         | 112.713   | 33.7267   |
| LOC100250192              | 0.340175  | 4.98771   | 2.2609    |
| LOC100854114              | 0.807691  | 4.48514   | 0.450367  |
| LOC104880723              | 2.22544   | 0         | 0.742594  |
| LOC100262122              | 9.43389   | 0.0460476 | 0.0167901 |
| LOC100267215              | 13.4197   | 10.6517   | 2.03813   |
| LOC104880762              | 0         | 2.0272    | 0.377964  |
| LOC104880753              | 0.136712  | 0.663365  | 1.18746   |
| LOC100855096              | 0.50062   | 3.21283   | 3.04002   |
| LOC100248929,LOC100253912 | 0.208079  | 0.404057  | 2.16582   |
| LOC100245404              | 0.151696  | 1.14329   | 0.792273  |
| LOC100855243              | 4.53535   | 16.6854   | 2.39635   |
| LOC100266751              | 0.698063  | 3.53048   | 3.27078   |
| LOC104880789              | 1.13638   | 5.56174   | 0         |
| LOC100249583              | 0.511553  | 0.0797174 | 3.96596   |
| LOC100244428              | 7.14815   | 0.363951  | 0.263031  |
| LOC100246245              | 18.5975   | 24.7597   | 89.4161   |
| LOC100264996              | 0.587155  | 2.7882    | 0         |
| LOC100259802              | 0.39618   | 10.3841   | 1.01704   |
| LOC100244426              | 0.619085  | 4.47183   | 13.6466   |
| LOC100256520              | 6.87903   | 9.0244    | 30.5765   |
| LOC100266747              | 2.18792   | 1.82077   | 23.2705   |
| LOC100241119              | 1.92695   | 7.68159   | 1.64361   |
| LOC100256457              | 2.91917   | 16.8206   | 76.7058   |
| LOC100242781              | 8.16242   | 55.0404   | 41.3409   |
| LOC100263305              | 0.847404  | 1.87514   | 3.58417   |
| LOC100266820              | 0.237095  | 3.51601   | 0.794404  |
| LOC100854936              | 1.3542    | 8.37475   | 3.83576   |
| LOC100854169              | 1.1178    | 3.79008   | 5.18111   |
| LOC100252233              | 0.632849  | 0         | 6.83836   |
| LOC100242081              | 0.271515  | 0.740486  | 1.25015   |
| LOC100855381              | 1.82465   | 1.84985   | 0.366034  |
| LOC100252279              | 8.91729   | 5.32293   | 28.9798   |
| LOC100257381              | 0.193112  | 1.90139   | 0.283559  |
| LOC100254085              | 2.01475   | 6.2229    | 9.97794   |
| LOC100248870              | 3.64264   | 1.24199   | 0.619995  |
| LOC100253969              | 0.226775  | 0.114968  | 1.44595   |
| LOC100243659              | 0.188194  | 0.518821  | 1.48287   |
| LOC100248798              | 1.76297   | 6.88209   | 0.873695  |
| LOC100243744              | 1.22374   | 0.834383  | 18.3495   |
| LOC100267794              | 0.0774704 | 1.26183   | 0.201545  |
| LOC100245484              | 0.051806  | 0         | 4.22516   |
| LOC100258492              | 0.455494  | 2.30818   | 1.49108   |
| LOC100263637              | 41.4873   | 5.54317   | 2.46714   |

|                           |           |          |          |
|---------------------------|-----------|----------|----------|
| LOC100253369              | 1.13102   | 0.124296 | 1.71411  |
| LOC100265426              | 35.6227   | 9.09739  | 60.4025  |
| LOC100233045              | 3.18478   | 69.9024  | 1.15362  |
| LOC100260211              | 0.767121  | 19.6007  | 44.9967  |
| LOC100261876              | 129.653   | 31.4771  | 105.653  |
| LOC100243183              | 0.916516  | 0.317713 | 1.30436  |
| OMT1                      | 0.0298004 | 0        | 1.71053  |
| LOC100248306              | 6.03317   | 1.75114  | 10.0265  |
| LOC104880880              | 0         | 0        | 20.7855  |
| LOC100261846              | 2.23832   | 0.565597 | 11.1237  |
| LOC100246512              | 0         | 0        | 1.02942  |
| LOC100253364              | 0.829531  | 3.69466  | 8.23491  |
| LOC100255186              | 0         | 3.00278  | 0.225078 |
| LOC100261836              | 0.229036  | 2.34475  | 0        |
| LOC100256744              | 0.425152  | 1.25594  | 1.94777  |
| LOC100248328              | 0.458595  | 8.54448  | 15.1988  |
| LOC100245897              | 77.7099   | 10.7343  | 93.9184  |
| LOC100251039              | 190.825   | 82.6055  | 40.3607  |
| LOC100263177              | 0.58233   | 1.72788  | 3.01395  |
| LOC100259728              | 0.955749  | 3.26328  | 10.1076  |
| LOC100854493              | 2.80696   | 14.7385  | 25.4962  |
| LOC100242544              | 4.93467   | 28.458   | 37.5223  |
| LOC100247678              | 23.2217   | 6.37308  | 5.39927  |
| LOC104880927              | 5.88543   | 1.44463  | 0.712172 |
| LOC100263071              | 2.31639   | 0.21117  | 0.540329 |
| LOC100244934              | 0.281225  | 1.71417  | 2.28286  |
| LOC100243324              | 0         | 0.109991 | 1.5345   |
| LOC104880950              | 0.813143  | 2.29046  | 0.39569  |
| LOC100854937              | 1.41143   | 1.0745   | 6.3843   |
| LOC100253830              | 1.03247   | 5.00472  | 5.4181   |
| LOC100853523              | 3.86092   | 0.534345 | 0.932786 |
| LOC100267415              | 1.80742   | 5.58688  | 11.12    |
| LOC104880967              | 0         | 1.03635  | 0.172699 |
| LOC100253734              | 1.76785   | 7.57636  | 3.68209  |
| LOC100265176              | 5.19375   | 23.2556  | 21.8747  |
| LOC104880991              | 0.237455  | 1.47905  | 0        |
| LOC100261789              | 12.4168   | 0.355426 | 6.56119  |
| LOC100248011              | 66.0501   | 7.01779  | 227.231  |
| LOC100246324              | 1.68439   | 1.65284  | 0.371066 |
| LOC104880986              | 3.48586   | 1.93492  | 0.397293 |
| LOC100242860              | 6.15908   | 28.2411  | 6.25561  |
| LOC100241211,LOC100246336 | 2.50394   | 3.86601  | 0.709429 |
| LOC104881073              | 2.63363   | 0        | 0.700743 |
| LOC100242191              | 2.16495   | 18.0452  | 10.393   |
| LOC100252443              | 17.6676   | 78.5076  | 34.0169  |
| LOC100243910              | 1.594     | 3.52162  | 0.654667 |
| LOC100266411              | 0.766137  | 1.34746  | 4.65154  |

|              |           |           |          |
|--------------|-----------|-----------|----------|
| LOC100243768 | 5.04238   | 4.34808   | 1.20752  |
| LOC104881040 | 0.0627925 | 0.02768   | 1.27804  |
| LOC100250636 | 0.074294  | 0.199151  | 1.44206  |
| LOC100233113 | 56.2454   | 124.719   | 745.59   |
| LOC104881028 | 8.39445   | 1.58836   | 5.28979  |
| LOC104881026 | 13.6636   | 7.78267   | 0.286821 |
| LOC100253941 | 1.41941   | 0.291725  | 0.66216  |
| LOC100852672 | 0.23653   | 4.08522   | 0.294736 |
| LOC100259242 | 2.99973   | 7.07614   | 1.70446  |
| GST3         | 44.8846   | 0.440727  | 0        |
| LOC100262536 | 103.51    | 0.948365  | 0.152646 |
| LOC104880855 | 0         | 1.20455   | 0.276861 |
| LOC100255689 | 2.44119   | 0.993164  | 6.24804  |
| LOC100266079 | 6.01127   | 3.22573   | 17.7871  |
| LOC104880825 | 4.12072   | 1.56583   | 7.47263  |
| LOC100255665 | 1.00669   | 0         | 0        |
| LOC100266060 | 0.0938933 | 0.935939  | 5.91021  |
| LOC100253895 | 8.54036   | 5.43305   | 38.8731  |
| LOC100264432 | 21.0317   | 0.837017  | 59.0926  |
| LOC100243748 | 1.52987   | 0.881088  | 3.9275   |
| LOC100243770 | 3.95861   | 1.4166    | 0.839523 |
| LOC100265959 | 2.55558   | 0.291633  | 3.46748  |
| LOC100241471 | 0.402454  | 8.99068   | 3.43597  |
| LOC100258604 | 0.6362    | 3.22184   | 1.17518  |
| LOC100253285 | 1.11091   | 0         | 0.604858 |
| LOC100243037 | 6.40117   | 0.863187  | 9.98313  |
| LOC104880864 | 0         | 1.71843   | 2.68457  |
| LOC100256792 | 49.8448   | 14.8961   | 71.6414  |
| LOC100256762 | 1.58283   | 2.09486   | 10.6985  |
| LOC100260185 | 7.52788   | 0.174944  | 1.8905   |
| LOC100255020 | 117.147   | 42.0069   | 231.72   |
| LOC100267124 | 0.676346  | 0.159723  | 14.8997  |
| LOC100251662 | 36.4894   | 7.62394   | 7.67188  |
| LOC100260207 | 2.1874    | 0.265804  | 0.134203 |
| LOC100265388 | 19.7045   | 4.61224   | 21.7191  |
| LOC104880896 | 1.15484   | 8.86861   | 2.43966  |
| LOC100266600 | 0.224042  | 0.0979593 | 1.58584  |
| LOC100247755 | 0.53481   | 33.6739   | 1.44591  |
| LOC100266583 | 6.38323   | 0.69975   | 4.30842  |
| LOC100252786 | 44.1235   | 8.64828   | 4.46846  |
| LOC104880934 | 0         | 0.824431  | 1.47406  |
| LOC100244155 | 3.19361   | 14.7704   | 20.1437  |
| LOC100250179 | 0.0782654 | 1.22132   | 0.206043 |
| LOC100265939 | 0.836889  | 2.16163   | 0        |
| LOC100854898 | 0         | 0         | 11.398   |
| LOC100241766 | 0.408388  | 0.442163  | 2.29287  |
| LOC100265929 | 1.30836   | 6.01756   | 1.02251  |

|                                        |          |           |           |
|----------------------------------------|----------|-----------|-----------|
| LOC100253842                           | 1.925    | 0.495983  | 0.179724  |
| LOC100264156                           | 5.6802   | 23.0989   | 10.298    |
| LOC100242982                           | 16.4208  | 193.148   | 39.8443   |
| LOC100267003                           | 0.216044 | 2.01092   | 0.468997  |
| LOC104881018                           | 23.7706  | 5.45264   | 173.776   |
| LOC104880979                           | 16.9736  | 0         | 0         |
| LOC104881052                           | 24.6683  | 3.89511   | 2.31477   |
| LOC100255940,LOC100855076,LOC104881076 | 24.3499  | 29.161    | 98.0772   |
| LOC104881075                           | 0.360444 | 1.92782   | 0.245236  |
| LOC100244072                           | 0        | 0.0512771 | 11.0106   |
| LOC100266401                           | 14.5454  | 0.936182  | 6.05404   |
| LOC100252582                           | 0        | 0.770648  | 1.59245   |
| LOC100267991                           | 1.67178  | 9.48024   | 0.361984  |
| LOC104881068                           | 3.40351  | 0         | 0.0228384 |
| LOC104881063                           | 44.1198  | 0.177102  | 1.71245   |
| LOC104881037,LOC104881066              | 3.13585  | 1.35326   | 0.747262  |
| LOC100855087,LOC104881036              | 4.2251   | 0         | 3.08763   |
| LOC104881060                           | 0.540378 | 0         | 1.96854   |
| LOC104881029                           | 16.3089  | 26.3179   | 160.908   |
| LOC100243669                           | 3.2877   | 0.468863  | 0         |
| LOC100258799                           | 5.54154  | 0.462766  | 25.6533   |
| LOC100267240                           | 0.183004 | 2.43138   | 0.0980603 |
| LOC100262156                           | 0        | 0.0958883 | 1.36859   |
| LOC100263824                           | 0.175785 | 1.28547   | 1.15567   |
| LOC100260392                           | 0.883418 | 3.9355    | 4.36593   |
| LOC100248525                           | 6.56872  | 1.13708   | 1.63048   |
| LOC100265720                           | 25.1984  | 1.39043   | 11.2502   |
| LOC100243391                           | 0.643571 | 0.674293  | 3.91379   |
| LOC100262072                           | 0.175428 | 0.758225  | 2.05611   |
| LOC100257059                           | 0.985733 | 0.301266  | 3.90576   |
| LOC100246797                           | 9.02155  | 0.585921  | 5.41645   |
| LOC100267208                           | 1.53656  | 0.921429  | 0.377822  |
| TIP1%3B1                               | 10.0503  | 6.27945   | 68.3849   |
| LOC100242729                           | 5.56169  | 25.8124   | 8.38258   |
| LOC104881141                           | 0        | 1.06143   | 0.844555  |
| LOC100256478                           | 3.92273  | 27.5342   | 25.1173   |
| LOC100241117                           | 4.81473  | 1.67042   | 13.1585   |
| LOC100244410                           | 5.56965  | 2.03601   | 9.9314    |
| LOC100241120                           | 3.21947  | 18.741    | 6.41195   |
| LOC100852492                           | 0.470913 | 2.10509   | 3.88652   |
| LOC100249681                           | 2.00585  | 1.66547   | 7.00157   |
| LOC100265103                           | 279.884  | 38.8998   | 113.755   |
| LOC100256525                           | 0.518778 | 0.897297  | 3.60801   |
| LOC104881130                           | 0        | 0.0717884 | 1.60226   |
| LOC100258131                           | 0        | 0.430713  | 1.51048   |
| LOC100854960                           | 97.1009  | 10.7253   | 52.4815   |
| LOC100256408                           | 3.0271   | 13.016    | 10.7562   |



|              |           |           |          |
|--------------|-----------|-----------|----------|
| LOC100259884 | 0.659455  | 1.53241   | 10.4449  |
| LOC100247927 | 0.235612  | 0.346162  | 4.73475  |
| LOC100242738 | 127.654   | 35.165    | 26.5953  |
| LOC100259896 | 0         | 0.302124  | 1.36911  |
| LOC100247937 | 0         | 0         | 10.2871  |
| LOC100263243 | 0.255001  | 0.595879  | 1.51214  |
| LOC100242744 | 0.385231  | 7.04888   | 7.95973  |
| LOC100233012 | 264.068   | 94.8195   | 22.2193  |
| LOC100246181 | 0.401062  | 1.29961   | 0.130312 |
| LOC100266758 | 1.75727   | 71.1433   | 0.52358  |
| LOC100240997 | 0         | 1.12983   | 0.304744 |
| LOC100259215 | 2.21013   | 4.05153   | 19.338   |
| LOC100253963 | 1.15232   | 6.54914   | 0        |
| LOC100260154 | 17.1971   | 3.6515    | 0.129286 |
| LOC100246540 | 0.0607465 | 0         | 2.61433  |
| LOC100256822 | 4.08577   | 10.0186   | 22.0779  |
| LOC100248168 | 4.87782   | 0.0293295 | 1.07339  |
| LOC100244711 | 1.17942   | 0         | 0.546761 |
| LOC104881227 | 0.45406   | 1.04764   | 2.60016  |
| LOC100252264 | 19.6809   | 0.0549184 | 0.800838 |
| LOC100259226 | 5.49248   | 1.24039   | 3.51234  |
| LOC104881248 | 0         | 2.03193   | 0.147707 |
| LOC100267759 | 6.06821   | 0.126675  | 2.2852   |
| LOC104881231 | 0.917319  | 3.11579   | 0.598551 |
| LOC100251485 | 0.802705  | 9.08302   | 5.22034  |
| LOC104881266 | 0         | 2.29757   | 0.520843 |
| LOC100248982 | 0.315091  | 40.3759   | 11.3919  |
| LOC100266045 | 2.47613   | 1.06548   | 11.9593  |
| LOC100853980 | 1.61242   | 11.0508   | 7.18178  |
| LOC100242949 | 7.8104    | 37.0329   | 7.84522  |
| LOC104881277 | 1.70132   | 6.88072   | 0.935416 |
| LOC100244656 | 1.16103   | 2.42095   | 0.311733 |
| LOC100852683 | 1.2365    | 9.42943   | 3.25583  |
| LOC104881298 | 2.07782   | 0.254787  | 0.310469 |
| LOC100251683 | 30.0648   | 6.9831    | 19.4095  |
| LOC100246545 | 0.194848  | 8.88786   | 0.775956 |
| LOC100248271 | 12.1566   | 0.217167  | 9.67444  |
| LOC100248253 | 0.971488  | 1.96263   | 0.346266 |
| LOC100265437 | 0.221578  | 1.49987   | 0.643569 |
| LOC100244848 | 4.54187   | 0.951269  | 1.16903  |
| LOC100853803 | 0.188981  | 4.36439   | 10.5206  |
| LOC100241493 | 1.11619   | 0         | 4.37105  |
| LOC100251681 | 5.08636   | 1.26492   | 5.51807  |
| LOC100855101 | 0.947472  | 0.360131  | 4.02205  |
| LOC100242459 | 0.493632  | 2.3239    | 0.255801 |
| LOC100252934 | 2.73247   | 9.31857   | 13.3338  |
| LOC100258065 | 3.00483   | 17.5707   | 0.335873 |

|                                        |           |           |           |
|----------------------------------------|-----------|-----------|-----------|
| LOC100240945                           | 0.63778   | 8.97122   | 2.02483   |
| LOC100246038                           | 0.286432  | 5.81891   | 0.573091  |
| LOC104881350                           | 0.17831   | 0.0838537 | 1.80339   |
| LOC100261425                           | 0.241708  | 2.56269   | 25.3759   |
| LOC104881349                           | 0.918866  | 1.76785   | 5.0386    |
| LOC100249452,LOC100264857,LOC100853465 | 4.74951   | 4.73872   | 21.1857   |
| LOC104881346                           | 2.26222   | 0.925788  | 48.2413   |
| LOC100245930                           | 0.647346  | 0.554708  | 6.21188   |
| LOC100255315                           | 0.738339  | 5.78263   | 1.3496    |
| LOC100245030                           | 2.62008   | 0.453609  | 2.79956   |
| LOC100243201                           | 43.6171   | 16.0535   | 67.1592   |
| LOC100267317                           | 1.02559   | 1.41848   | 4.62028   |
| LOC100262045                           | 1.81105   | 1.45445   | 9.70858   |
| LOC100263817                           | 9.72256   | 19.2941   | 3.65971   |
| LOC100255303                           | 0.567637  | 0         | 1.52762   |
| LOC100267335                           | 46.9241   | 8.13215   | 106.163   |
| LOC100245000                           | 0.200325  | 2.00634   | 2.32896   |
| LOC100265591                           | 1.19309   | 3.2092    | 20.0358   |
| LOC100854814                           | 0.162519  | 0.190007  | 2.01562   |
| LOC100265586                           | 0.484439  | 3.28557   | 2.89919   |
| LOC104881144                           | 26.3371   | 2.87686   | 35.131    |
| LOC100265056                           | 0.515775  | 3.9937    | 0.408095  |
| LOC100251241                           | 5.19742   | 18.8841   | 30.3997   |
| LOC100261491                           | 0.21265   | 0.120429  | 3.24478   |
| LOC100241084                           | 3.74307   | 0.92402   | 2.80373   |
| LOC100242821                           | 23.6864   | 4.48434   | 11.0294   |
| LOC100261545                           | 0.289409  | 2.05174   | 6.17652   |
| LOC100249578                           | 0         | 0.473866  | 3.39995   |
| LOC100259842                           | 5.80785   | 1.59145   | 1.35528   |
| LOC100247965,LOC100253091              | 114.863   | 25.4297   | 202.696   |
| LOC104881153                           | 2.2223    | 22.0296   | 1.98051   |
| PIP2%3B1                               | 1229.55   | 400.542   | 1776.23   |
| LOC100258229                           | 119.023   | 15.4599   | 11.4652   |
| LOC100249618                           | 31.0139   | 1.36468   | 9.77612   |
| LOC100259822                           | 0.410493  | 3.19177   | 0.364927  |
| LOC100262621                           | 1.41914   | 0         | 0         |
| LOC100241998                           | 2.73121   | 11.7109   | 25.9144   |
| LOC104881194                           | 2.45623   | 0         | 1.66192   |
| LOC100267185                           | 0.0692121 | 0.329121  | 17.4466   |
| LOC100248183                           | 0.683145  | 0.111905  | 21.9562   |
| LOC100265452                           | 8.18009   | 8.18431   | 1.53303   |
| LOC100256901                           | 1.28113   | 0.462496  | 0.0831502 |
| LOC100244619                           | 1.41784   | 0.0666264 | 0         |
| LOC104881225                           | 0.447799  | 2.04101   | 3.14945   |
| LOC100250801                           | 0.896598  | 0.812953  | 6.44069   |
| LOC100267983                           | 1.3517    | 1.65832   | 5.63132   |
| LOC104881229                           | 0.870196  | 2.09551   | 0         |

|                           |           |           |           |
|---------------------------|-----------|-----------|-----------|
| LOC100259102              | 2.53301   | 0.132415  | 0.53469   |
| LOC100253935              | 1.29271   | 0.619822  | 0.0811749 |
| LOC100256621              | 9.62764   | 12.7647   | 2.19827   |
| LOC104881267              | 0.489575  | 2.15387   | 1.49247   |
| LOC104881264              | 1.64325   | 0.583625  | 4.09155   |
| LOC100267657              | 1.47992   | 0.198686  | 3.67314   |
| LOC100260835              | 3.45603   | 1.51313   | 6.51669   |
| LOC104881260              | 0.348922  | 0         | 1.28498   |
| LOC100248873              | 0.421875  | 5.82067   | 2.24365   |
| LOC100267765              | 0.182832  | 0.451823  | 1.14902   |
| LOC100854267              | 69.0137   | 0.21036   | 0.113978  |
| LOC104881279              | 3.95898   | 0.934751  | 3.173     |
| LOC100256802              | 0.292484  | 2.60134   | 0.119396  |
| LOC100251675              | 0.109878  | 1.29836   | 0.468267  |
| LOC100246623              | 13.0121   | 2.99192   | 9.40805   |
| LOC100248162              | 6.03624   | 1.68632   | 6.85548   |
| LOC104881338              | 18.0466   | 0         | 2.8897    |
| LOC100263758              | 2.0093    | 0.266306  | 0.889527  |
| LOC104881316              | 0.359827  | 0.14551   | 1.78232   |
| LOC100267144              | 5.86476   | 0         | 0         |
| LOC100249468              | 0.550305  | 1.2962    | 4.40922   |
| LOC100254554,LOC104881302 | 10.5411   | 12.6258   | 3.11654   |
| LOC100261320              | 0.376175  | 2.24283   | 0.125241  |
| LOC100263212              | 0.454265  | 1.61039   | 4.60508   |
| LOC100855367              | 7.45563   | 13.073    | 43.3492   |
| LOC100242579              | 0.0966634 | 0.179777  | 1.33091   |
| LOC100247715              | 0.135251  | 0.183219  | 1.01751   |
| LOC100264849              | 7.98793   | 11.5205   | 44.3306   |
| LOC100244282              | 88.4574   | 18.0989   | 30.6655   |
| LOC100257908              | 0.162777  | 0.164981  | 1.10372   |
| LOC100240883              | 0.869129  | 0         | 1.31679   |
| LOC100244157              | 20.1372   | 4.15258   | 8.26525   |
| LOC100232941              | 2.52381   | 2.67697   | 24.0132   |
| LOC100240807              | 3.63656   | 0.408748  | 0.158563  |
| LOC100259692              | 11.405    | 1.9113    | 5.82369   |
| LOC100261443              | 1.34791   | 7.49815   | 0.359786  |
| LOC100250410              | 1.58457   | 3.09082   | 8.74782   |
| LOC104881443              | 0.137669  | 1.44382   | 0.92043   |
| LOC104881440,LOC104881456 | 0         | 27.5257   | 4.97085   |
| LOC104881438              | 0.463151  | 0.0922728 | 2.22827   |
| LOC100260652              | 0.799489  | 0.0798245 | 1.1476    |
| LOC100241809              | 96.0162   | 23.7262   | 102.998   |
| LOC100247035              | 1.87265   | 8.33168   | 1.02767   |
| LOC100854778              | 8.71297   | 3.42795   | 17.057    |
| LOC100262295              | 1.26165   | 1.80232   | 7.83238   |
| LOC100267439              | 7.56614   | 54.9522   | 10.5137   |
| LOC100264063              | 53.5992   | 7.67512   | 18.6568   |

|                           |          |           |           |
|---------------------------|----------|-----------|-----------|
| LOC100255405              | 2655.53  | 2218.36   | 383.911   |
| LOC104881471              | 1.04041  | 10.8969   | 0.606017  |
| LOC104877303              | 0        | 1.05545   | 0         |
| LOC104881508              | 0.243595 | 0.178767  | 1.24386   |
| LOC104881521              | 0.346374 | 0.38379   | 4.08539   |
| LOC100261369              | 24.5318  | 0.231918  | 0.0778578 |
| LOC104881494              | 0.42462  | 0.782876  | 1.88506   |
| LOC100264805,LOC104877371 | 0.464458 | 2.29682   | 1.38983   |
| LOC104881513              | 1.81052  | 2.11229   | 0.267749  |
| LOC100240893              | 3.28854  | 6.37129   | 1.03283   |
| LOC100242523              | 3.81323  | 9.26773   | 2.31564   |
| LOC100249700              | 0.951175 | 4.51027   | 0.519221  |
| LOC100251445              | 3.12247  | 3.07054   | 13.3006   |
| LOC100258402              | 2.47889  | 4.66783   | 1.16433   |
| LOC104881585              | 0        | 1.04221   | 2.30327   |
| LOC100246645              | 4.17191  | 8.84363   | 30.4981   |
| LOC100243237              | 13.638   | 61.2126   | 85.9588   |
| LOC100248367              | 2.46856  | 13.6544   | 0.0423811 |
| LOC100251383              | 0        | 0.0835689 | 1.40218   |
| LOC100249652              | 0.229533 | 0.0766348 | 3.31771   |
| LOC100244704              | 6.93466  | 19.3985   | 161.976   |
| LOC100854072              | 3.88066  | 34.858    | 282.487   |
| LOC100241191              | 0.577307 | 1.76121   | 0.382613  |
| LOC104881566              | 0.694926 | 3.67116   | 0.573799  |
| LOC100249716              | 3.75368  | 1.22123   | 0.209155  |
| LOC100855078              | 0.885195 | 4.48463   | 9.81268   |
| LOC100254983              | 0.332746 | 9.7544    | 3.03747   |
| LOC100253129              | 0.226391 | 2.57112   | 20.2219   |
| LOC104881615              | 0.333002 | 2.86307   | 0         |
| LOC100854073              | 131.311  | 6.84621   | 23.8462   |
| LOC100263410              | 3.04775  | 0.620711  | 6.65761   |
| LOC100249844              | 0.568028 | 5.37945   | 5.15834   |
| LOC100265266              | 9.84343  | 41.2877   | 9.31983   |
| LOC100246380              | 0.551659 | 1.17489   | 6.52244   |
| LOC100246358              | 34.7721  | 6.32611   | 5.63965   |
| LOC100265200              | 0.921139 | 1.16374   | 6.00476   |
| LOC100251434              | 2.9382   | 16.0892   | 4.40671   |
| LOC100260066              | 5.59595  | 4.91432   | 29.4136   |
| LOC100249110              | 10.4568  | 2.44318   | 3.73244   |
| LOC100259468              | 0.234666 | 5.98526   | 1.36704   |
| LOC100245690              | 0        | 12.4744   | 10.5646   |
| LOC100243977              | 30.9753  | 8.79124   | 3.66888   |
| LOC100256128              | 0        | 2.07381   | 1.21822   |
| LOC100852430              | 0.516349 | 4.79134   | 1.77806   |
| LOC100852579,LOC104881666 | 0.655753 | 6.00136   | 4.07558   |
| LOC100254241              | 39.8884  | 18.4153   | 6.48102   |
| LOC100249137              | 165.22   | 20.1978   | 36.3073   |

|                                        |           |           |           |
|----------------------------------------|-----------|-----------|-----------|
| LOC100249235                           | 0.332936  | 0.105176  | 1.07735   |
| LOC100853467                           | 0.850968  | 1.15115   | 3.534     |
| LOC100254380                           | 4.10672   | 0.469201  | 0.0256995 |
| LOC100259439                           | 0.202776  | 0.493419  | 2.06295   |
| LOC100249226                           | 0.566578  | 2.33369   | 1.66417   |
| LOC100244055                           | 0.210383  | 3.57892   | 7.06574   |
| LOC104881677                           | 0.150398  | 1.90801   | 5.52849   |
| LOC100261249                           | 42.2733   | 8.09945   | 33.1539   |
| LOC100257620,LOC100257851              | 0         | 1.26586   | 0.248163  |
| LOC100267969                           | 0.25127   | 1.44469   | 0.612267  |
| LOC100256158                           | 1.03898   | 2.0205    | 0.397496  |
| LOC100244032,LOC100268107              | 0.423479  | 3.47034   | 1.34409   |
| LOC100247366                           | 0.0227714 | 0.25601   | 1.29835   |
| LOC100268097                           | 0.972154  | 4.12559   | 3.6366    |
| LOC100242374                           | 13.7466   | 35.9765   | 8.65412   |
| LOC100266209                           | 25.8982   | 27.4849   | 1.95651   |
| LOC100250998                           | 26.6335   | 37.126    | 8.2302    |
| LOC100262730                           | 3.40118   | 14.63     | 14.7102   |
| LOC100245918                           | 0.358639  | 0.396263  | 2.31604   |
| LOC100261280                           | 3.28471   | 0.496726  | 0.482581  |
| LOC100266622                           | 28.4843   | 6.29866   | 7.19863   |
| LOC100240902                           | 1.24961   | 0         | 1.291     |
| LOC100266479                           | 0.834181  | 0.609466  | 3.44333   |
| LOC100249324,LOC100257918              | 22.7162   | 2.34897   | 3.41577   |
| LOC100258017                           | 1.22763   | 0         | 15.319    |
| LOC100247691                           | 1.31551   | 0.0922793 | 0.617678  |
| LOC100254544                           | 0.352704  | 1.69357   | 8.62671   |
| LOC100251167                           | 40.1963   | 8.23968   | 47.3936   |
| LOC104881365                           | 2.57128   | 0.63159   | 0.491739  |
| LOC100242551                           | 5.73082   | 0.0423447 | 0         |
| LOC100266614                           | 20.9534   | 0.431421  | 37.0287   |
| LOC100258047                           | 4.8528    | 0.0448798 | 0         |
| LOC104881360                           | 1.01009   | 0.132594  | 0.15647   |
| LOC100249435                           | 0         | 0.136604  | 2.42761   |
| LOC104881378                           | 0.0693064 | 0         | 1.15481   |
| LOC100244270                           | 0         | 0         | 1.37306   |
| LOX                                    | 5.63756   | 59.1735   | 4.22087   |
| LOC100252850                           | 0.691233  | 6.78233   | 0.562764  |
| LOC100247676                           | 1.91321   | 6.59908   | 0.151769  |
| LOC100240917                           | 12.5725   | 7.84426   | 40.4554   |
| LOC100243559,LOC100248572,LOC104877436 | 77.7729   | 0.270725  | 3.46247   |
| LOC100854480,LOC104881462              | 3.78483   | 10.3795   | 0.195842  |
| LOC104881448                           | 51.8266   | 5.07159   | 13.8576   |
| LOC100265873                           | 1.84025   | 0.0822918 | 0.402287  |
| LOC100854088                           | 0         | 0         | 5.58343   |
| LOC100267582                           | 0.820535  | 1.15469   | 7.33995   |
| LOC100247065                           | 0.888685  | 4.22518   | 1.47939   |

|                           |           |           |           |
|---------------------------|-----------|-----------|-----------|
| LOC104881433              | 2.49949   | 0.600778  | 4.27254   |
| LOC104881431              | 1.32616   | 2.05546   | 0.4889    |
| LOC100243958              | 12.2099   | 5.70484   | 0.793153  |
| LOC104881430              | 1.32462   | 3.48928   | 0.236959  |
| LOC100855224              | 0.600869  | 1.34586   | 9.82436   |
| LOC100264196              | 26.5875   | 116.954   | 72.5321   |
| LOC100245132              | 6.79845   | 1.32839   | 0.481963  |
| LOC100241881              | 0.359937  | 3.05484   | 1.45241   |
| LOC100258882              | 1.84159   | 0         | 1.88504   |
| LOC100262403              | 5.89319   | 18.275    | 3.2616    |
| LOC100253509              | 1.31669   | 3.22173   | 0.690465  |
| LOC100251326              | 6.62378   | 1.39042   | 18.8179   |
| LOC104881532              | 0.624626  | 0.442987  | 1.91558   |
| LOC104877448              | 0.803151  | 0.399445  | 2.0282    |
| LOC100241200              | 29.8702   | 2.47317   | 33.981    |
| LOC100246029,LOC104881527 | 3.18684   | 1.36731   | 11.388    |
| LOC104881525              | 0.537252  | 0.172407  | 1.57527   |
| LOC104881503              | 4.09786   | 0.204525  | 29.3236   |
| LOC100253505              | 31.3774   | 9.80333   | 6.29357   |
| LOC100261475              | 18.5952   | 3.78256   | 18.6388   |
| LOC104881519              | 1.49693   | 0         | 0.0929562 |
| LOC104881542              | 0         | 0         | 2.48083   |
| LOC100263787              | 0.961906  | 3.18805   | 4.36817   |
| LOC104881590              | 4.88255   | 0.12709   | 0         |
| LOC100251783              | 6.06525   | 1.07898   | 6.42714   |
| LOC104881551              | 5.34422   | 6.67543   | 27.7124   |
| LOC100855127              | 0.157209  | 1.06599   | 0.241209  |
| LOC104881559              | 5.02425   | 56.6991   | 2.61168   |
| LOC104881561              | 1.09374   | 0.0810604 | 0         |
| LOC104881600              | 0         | 3.6186    | 1.30042   |
| LOC104881564              | 6.08447   | 0.87436   | 8.50922   |
| LOC104881569              | 0         | 0         | 3.11044   |
| LOC100248073              | 3.12008   | 0.922892  | 4.67682   |
| LOC100853068              | 0.0966003 | 1.03576   | 16.5783   |
| LOC100261655              | 8.13431   | 13.5776   | 33.0622   |
| LOC100251569              | 0.237979  | 0         | 1.43877   |
| LOC100242952              | 1.21207   | 26.5533   | 51.6348   |
| LOC100256612              | 0.834322  | 2.51086   | 0.497705  |
| LOC100241245              | 0.583598  | 0         | 1.71974   |
| BR6OX1                    | 49.9905   | 10.5554   | 35.5793   |
| LOC100246342              | 8.6533    | 1.0723    | 4.07206   |
| LOC104881631              | 87.135    | 30.9384   | 282.085   |
| LOC100241313              | 0.244062  | 1.59598   | 0.775314  |
| LOC100249810              | 1.55497   | 0.254787  | 5.94788   |
| LOC100855368              | 0         | 1.38106   | 0         |
| LOC100249838              | 0.849943  | 0.603789  | 3.46735   |
| LOC100244680              | 1.70801   | 0.815411  | 0.339277  |

|                           |           |           |           |
|---------------------------|-----------|-----------|-----------|
| LOC100248101              | 2.93693   | 32.827    | 6.74704   |
| LOC100246292              | 0.999172  | 4.41395   | 1.2003    |
| LOC104881648              | 2.12218   | 4.09916   | 0.815423  |
| LOC100261671              | 3.82807   | 17.3859   | 4.44749   |
| LOC104881661              | 5.22012   | 0.642355  | 4.40384   |
| LOC100245735              | 40.2104   | 17.866    | 2.83856   |
| LOC100244128              | 0.0780499 | 0.113943  | 1.72771   |
| LOC100267902              | 10.3694   | 64.6978   | 27.149    |
| LOC100261203              | 3.17919   | 2.34653   | 0.424366  |
| LOC100244063              | 1.87436   | 1.97673   | 7.89948   |
| LOC100257711              | 2.1879    | 2.44515   | 0.59375   |
| LOC100250791              | 0.569677  | 0.228626  | 3.23518   |
| LOC100250859              | 4.094     | 17.9027   | 8.5025    |
| LOC100244038              | 0.200341  | 1.56599   | 2.53815   |
| LOC104881685              | 1.04556   | 5.73922   | 1.01425   |
| LOC100245787              | 0.168598  | 2.86771   | 0.565556  |
| LOC104877279              | 0.516485  | 0.880381  | 7.39212   |
| LOC100242238              | 107.847   | 8.15865   | 3.9952    |
| LOC100255991,LOC100854125 | 85.6561   | 1.61511   | 27.8434   |
| LOC100250853              | 201.991   | 2.7233    | 323.967   |
| LOC104881698              | 1.36725   | 14.301    | 13.2637   |
| LOC100259413              | 5.85264   | 0.877025  | 4.04932   |
| LOC100243953              | 7.67008   | 5.25572   | 42.984    |
| LOC100242017              | 0.726549  | 3.31209   | 0.166705  |
| LOC104881728              | 0.20146   | 6.40262   | 0         |
| LOC100262611              | 5.67088   | 18.7414   | 2.832     |
| LOC104881723              | 0.781469  | 0.54968   | 6.78844   |
| LOC100247140              | 1.29266   | 8.761     | 4.40792   |
| LOC104881715              | 10.2545   | 0         | 0         |
| LOC104881789              | 0         | 0.310069  | 2.32729   |
| LOC100260421              | 2.79929   | 9.31597   | 18.2048   |
| LOC100244941              | 11.8274   | 75.6904   | 16.0561   |
| LOC100854387              | 1.38425   | 7.65845   | 1.13909   |
| LOC100257290              | 2.76131   | 0.639349  | 0.408828  |
| LOC100260525              | 0.535051  | 4.36332   | 3.9188    |
| LOC100257309              | 0.566079  | 18.9041   | 0         |
| LOC104881770              | 0.781036  | 1.0342    | 0.224134  |
| LOC104881776              | 0         | 0.397049  | 7.21701   |
| LOC100263729              | 3.42385   | 0.74901   | 0.0298378 |
| LOC100243849,LOC100250668 | 1.84616   | 0         | 0.0322017 |
| LOC104881819              | 2.25179   | 0.199643  | 1.62718   |
| LOC100263313              | 0.0735883 | 0.157023  | 1.26235   |
| LOC100251390              | 29.6035   | 0.647492  | 58.0119   |
| LOC104881840              | 0.155928  | 0         | 1.76867   |
| LOC104881813              | 2.46068   | 85.673    | 68.1056   |
| LOC100261547              | 0.306187  | 0.0201952 | 1.53594   |
| LOC100265053              | 45.4535   | 2.85255   | 20.795    |

|                           |           |           |          |
|---------------------------|-----------|-----------|----------|
| LOC100256456              | 0.271428  | 1.12792   | 4.3283   |
| LOC100242687              | 14.0906   | 0.667042  | 0.185261 |
| LOC100253104              | 0.998505  | 8.38176   | 0.108023 |
| LOC100253046              | 641.354   | 1090.92   | 62.49    |
| LOC104881898              | 3.52861   | 25.8812   | 4.56144  |
| LOC100255703              | 8.17407   | 14.0053   | 0.499094 |
| LOC100247285              | 0.255747  | 0.288736  | 1.09042  |
| LOC100257531              | 65.1037   | 19.256    | 2.56084  |
| LOC100250596              | 8.99085   | 2.20348   | 3.34726  |
| LOC100255780              | 0.635916  | 11.1696   | 1.47759  |
| LOC100854402              | 2.45129   | 0.608188  | 0.578544 |
| LOC100243647              | 8.60099   | 0.501862  | 17.677   |
| LOC104881866              | 6.62735   | 2.75939   | 14.423   |
| LOC104881888              | 0         | 3.10202   | 0        |
| LOC100262652              | 0.607207  | 6.14632   | 2.4009   |
| LOC104881856              | 6.62477   | 57.1513   | 30.9407  |
| LOC104881857,LOC104881858 | 1.34827   | 22.5697   | 5.02489  |
| LOC100262563              | 23.1126   | 2.56757   | 0.876038 |
| LOC104881886              | 1.45753   | 0         | 0        |
| LOC100260786              | 0.607636  | 5.93129   | 0.098884 |
| LOC100265990              | 0.532297  | 4.44311   | 0.121219 |
| LOC100264217              | 0.250129  | 0.0453927 | 1.42044  |
| LOC100245524              | 4.81723   | 2.08368   | 15.5131  |
| LOC100267266              | 2.67257   | 1.71449   | 9.43436  |
| LOC100246839,LOC100257109 | 3.57567   | 0.608946  | 0.535735 |
| LOC100267384              | 0.212014  | 1.12529   | 3.97182  |
| LOC100260458              | 149.343   | 34.8191   | 72.5842  |
| LOC100241611              | 2.32067   | 2.3151    | 24.669   |
| LOC100246741              | 4.61695   | 0.896814  | 3.87411  |
| LOC100852926              | 22.7616   | 1.67292   | 8.37454  |
| LOC100852808              | 11.2286   | 3.57991   | 21.1581  |
| LOC104881934              | 1.59005   | 0.0431512 | 0        |
| LOC104881933              | 3.99527   | 0.0738305 | 0        |
| LOC104881932              | 1.97333   | 0         | 0        |
| LOC100250031              | 12.5451   | 2.03806   | 45.0323  |
| LOC100251711              | 2.21544   | 36.4831   | 4.17829  |
| LOC104881922              | 0.572606  | 3.58801   | 0.71027  |
| LOC100251716              | 46.8095   | 24.4148   | 6.64055  |
| LOC100260157              | 2.59139   | 0.547591  | 1.54979  |
| LOC100253319              | 1.23834   | 0         | 0        |
| LOC104881915              | 3.47306   | 1.10132   | 4.73937  |
| LOC100267106              | 2.72636   | 0.22184   | 0        |
| LOC104881912              | 2.97451   | 6.66274   | 27.0506  |
| LOC104881911              | 0.0242307 | 0         | 3.5808   |
| LOC100245433              | 0.37266   | 12.3649   | 0.28462  |
| LOC104881729              | 0.533743  | 0.318575  | 1.55953  |
| LOC100267645              | 0.244385  | 0.147307  | 1.94038  |



|                           |           |           |          |
|---------------------------|-----------|-----------|----------|
| LOC100253958,LOC100264385 | 5.82463   | 27.2853   | 5.7914   |
| LOC104881718              | 4.35938   | 0         | 7.11863  |
| LOC100258566              | 7.04612   | 51.1876   | 41.4515  |
| LOC100249847              | 0.771818  | 1.82649   | 4.74868  |
| LOC104881783              | 0         | 0         | 4.09666  |
| LOC100855173              | 1.76874   | 9.10813   | 37.748   |
| LOC104881774              | 0.639678  | 4.35738   | 0.96289  |
| LOC100252221              | 1.95229   | 0         | 0        |
| LOC100267612              | 2.47104   | 0.203328  | 3.80571  |
| LOC100263322              | 4.40667   | 5.02076   | 26.4453  |
| LOC100264963              | 0.212288  | 0.101121  | 2.28923  |
| LOC100247895,LOC100259793 | 0.647669  | 1.31889   | 0.250564 |
| LOC100258179              | 4.41586   | 28.6057   | 44.1467  |
| LOC100249535,LOC100251342 | 1.62919   | 10.5001   | 2.73968  |
| LOC100249535              | 0.0503733 | 4.19834   | 0.346301 |
| LOC104881876              | 0         | 3.17678   | 0.876439 |
| LOC100264273              | 6.52588   | 12.2698   | 1.54831  |
| LOC100260776              | 3.59432   | 17.5302   | 21.0035  |
| LOC104881873              | 15.5864   | 0.650084  | 0.298054 |
| LOC100248925              | 0.199307  | 1.48787   | 0.360202 |
| LOC100242041              | 13.7157   | 68.4938   | 10.1786  |
| LOC100242115              | 1.11534   | 0.385861  | 2.65199  |
| MADS3                     | 0.537893  | 2.71086   | 1.06027  |
| LOC100255710              | 1.28318   | 7.65846   | 1.23501  |
| LOC100266067              | 0.383011  | 0.0282092 | 3.83425  |
| LOC100248810,LOC100253903 | 0.996183  | 0.259861  | 5.31793  |
| LOC100262525              | 0.954078  | 2.52249   | 4.85612  |
| LOC100267685              | 0.175679  | 0         | 4.7765   |
| LOC100245370              | 0.199166  | 0.0788697 | 3.4825   |
| LOC104881870              | 0.637292  | 1.91458   | 0.466374 |
| LOC104881864              | 2.45211   | 2.19896   | 0.578917 |
| LOC100261912              | 19.094    | 2.50901   | 13.0398  |
| LOC104881879              | 0.519862  | 3.81833   | 4.83871  |
| LOC100250645              | 3.87971   | 8.03244   | 27.0463  |
| LOC100260344              | 6.83608   | 3.15063   | 1.68795  |
| LOC100263781              | 21.1488   | 105.002   | 57.0579  |
| LOC100249901              | 3.18811   | 0.18716   | 1.16988  |
| LOC104881928              | 0.935614  | 4.66569   | 0.927281 |
| LOC100255049              | 0.738119  | 2.60683   | 0.628179 |
| LOC100256846              | 34.0684   | 2.16063   | 93.4578  |
| LOC100258452              | 16.2439   | 6.00843   | 3.7604   |
| LOC100258567              | 0         | 1.63071   | 0.078687 |
| LOC100265390,PIP1%3B2     | 184.182   | 43.0688   | 609.198  |
| LOC100243164              | 0         | 1.18976   | 0.202241 |
| LOC104881903              | 0.268108  | 2.07365   | 1.63942  |
| LOC100244348              | 0.246421  | 1.27767   | 1.80474  |
| LOC100257926              | 15.196    | 1.5907    | 12.8512  |

|                           |           |          |           |
|---------------------------|-----------|----------|-----------|
| LOC100240884              | 33.8646   | 3.80973  | 62.4219   |
| LOC100263141              | 2.42094   | 0.726456 | 0.400477  |
| LOC100242618              | 3.40315   | 8.501    | 1.90959   |
| LOC100251137              | 0.765768  | 1.76345  | 0.103162  |
| LOC100245997              | 0.248631  | 1.28551  | 0.126013  |
| LOC104881974              | 2.03256   | 4.33585  | 0.803134  |
| LOC100263160              | 0.285102  | 1.28842  | 0.231427  |
| LOC100854997              | 0.873144  | 1.07139  | 0.0878802 |
| LOC100266481              | 0.840496  | 1.26001  | 0.195423  |
| LOC100264816              | 0         | 0.165353 | 8.31097   |
| LOC104881978              | 10.0951   | 13.7872  | 0         |
| LOC100251088              | 1.79768   | 8.625    | 0.544925  |
| LOC100256282              | 44.2397   | 342      | 101.434   |
| LOC100853363              | 11.1783   | 52.9413  | 16.3697   |
| LOC100264915              | 0.492317  | 0.614888 | 2.20001   |
| LOC100259725              | 3.76045   | 3.07052  | 15.259    |
| LOC100254616              | 8.76778   | 3.49292  | 14.7536   |
| LOC100249507              | 1.9069    | 5.5758   | 7.78828   |
| LOC100254297,LOC104882087 | 3.42166   | 23.9596  | 2.93813   |
| LOC104882050              | 1.85505   | 5.64391  | 13.7118   |
| HT4                       | 8.88715   | 0.323178 | 2.16848   |
| LOC100243899              | 0         | 0.144985 | 1.36461   |
| LOC104882052              | 19.9574   | 148.262  | 29.4252   |
| LOC104882023              | 0         | 146.699  | 130.155   |
| LOC100260809              | 1.12369   | 0.158994 | 0.198324  |
| LOC100257357              | 10.946    | 0        | 0         |
| LOC100853317              | 0.580315  | 5.25909  | 0.837948  |
| LOC100246573              | 4.81692   | 1.83097  | 0.920442  |
| LOC100246778              | 8.79476   | 0.954586 | 4.24722   |
| LOC100253626              | 2.04305   | 0.717372 | 9.57923   |
| LOC100260413              | 1.77814   | 1.0122   | 4.42784   |
| LOC100253548              | 113.115   | 19.3595  | 142.648   |
| LOC100256970              | 1.77888   | 3.68583  | 170.619   |
| LOC100260301              | 2.18439   | 1.60327  | 21.7884   |
| LOC100258792              | 469.732   | 6.9934   | 10.9006   |
| LOC100265520              | 0.630707  | 0        | 18.6661   |
| LOC100265307              | 0         | 1.01416  | 0.030575  |
| LOC104882133              | 0.0891183 | 2.55412  | 0.140779  |
| LOC100254147              | 0.739324  | 2.08077  | 0.353329  |
| LOC100249725              | 3.51761   | 16.5571  | 3.08819   |
| LOC100263561              | 1.24089   | 3.30894  | 7.11424   |
| LOC100253196              | 0.943944  | 3.21645  | 11.4835   |
| LOC100854290              | 1.61153   | 0        | 0.216846  |
| LOC100252397              | 1.83024   | 0        | 0         |
| LOC100267477              | 0.140119  | 1.239    | 1.87497   |
| LOC100262321              | 9.1426    | 44.4221  | 1.5294    |
| LOC100245181              | 5.86748   | 8.48515  | 0.2814    |

|                           |          |           |           |
|---------------------------|----------|-----------|-----------|
| LOC100250301              | 6.97777  | 20.3374   | 0.393605  |
| LOC100264173              | 0.351686 | 1.89171   | 0.167818  |
| LOC100264844              | 0.8255   | 7.23301   | 0.328774  |
| LOC100267841              | 54.4879  | 73.6564   | 3.08886   |
| LOC100250543              | 5.54482  | 2.43796   | 20.1704   |
| LOC100245414              | 2.67513  | 0.446952  | 0.121927  |
| LOC100267733              | 0.266328 | 2.62177   | 0.0302484 |
| LOC100257448              | 0.40652  | 0.0152844 | 1.67007   |
| LOC104882202              | 0.204794 | 6.01533   | 0.0385509 |
| LOC100242214              | 4.31483  | 3.02385   | 0.95185   |
| LOC100257736              | 3.58117  | 3.56309   | 0.831546  |
| LOC100247478,LOC100854849 | 0.406893 | 1.42245   | 8.77688   |
| LOC100252599              | 18.0561  | 48.2351   | 112.278   |
| LOC104882217              | 3.23924  | 10.8839   | 2.19598   |
| LOC104882216              | 0        | 4.03542   | 0.744391  |
| LOC100261214              | 8.6705   | 2.95259   | 1.79812   |
| LOC100247310              | 6.31808  | 3.1024    | 0.794667  |
| LOC104882184              | 1.73922  | 23.2066   | 1.63557   |
| LOC100242322              | 62.9242  | 10.6403   | 20.1956   |
| LOC100243904              | 1.31182  | 0.263848  | 0.420445  |
| LOC100247451,LOC100254307 | 1.11547  | 8.9847    | 4.18763   |
| LOC100242316              | 0.275562 | 2.04368   | 0.0498846 |
| LOC100854640              | 4.44714  | 0.833423  | 3.97899   |
| LOC100854759              | 1.40983  | 3.26033   | 0.166007  |
| LOC100262350              | 11.8312  | 41.404    | 5.39912   |
| LOC100245317              | 0.828816 | 3.81629   | 6.324     |
| LOC100267499              | 31.5338  | 51.6962   | 4.69934   |
| LOC100853393              | 0.584313 | 2.67633   | 1.00315   |
| LOC100252122              | 11.4638  | 100.326   | 22.1482   |
| LOC100261281              | 0.558971 | 2.77932   | 1.17283   |
| LOC100259640              | 8.17514  | 2.38278   | 77.1385   |
| LOC100254521              | 7.40284  | 18.8371   | 82.3147   |
| LOC100266593              | 1.23839  | 2.12325   | 0.277612  |
| LOC104881973              | 0        | 0         | 1.41737   |
| LOC100251111              | 9.95325  | 18.889    | 3.71308   |
| LOC100245976              | 1.2055   | 17.7567   | 15.7671   |
| UFGT                      | 297.234  | 308.218   | 2.09291   |
| LOC100264872              | 16.2988  | 22.9159   | 2.22896   |
| LOC100259687              | 2.79331  | 13.1371   | 30.2358   |
| LOC100246060,LOC104877432 | 22.5697  | 38.8859   | 220.74    |
| LOC100263048              | 4.15404  | 1.59912   | 0.76848   |
| LOC100249403              | 0        | 2.12916   | 0.293726  |
| LOC104882038              | 5.05681  | 24.7073   | 9.85841   |
| LOC100244163              | 4.5439   | 8.24211   | 0.415817  |
| LOC100247649              | 2.66204  | 17.53     | 6.71386   |
| LOC100264804              | 1.09492  | 10.3667   | 6.27193   |
| LOC104882047              | 11.6231  | 0         | 1.56537   |

|                                        |          |           |           |
|----------------------------------------|----------|-----------|-----------|
| LOC100261150,LOC100854021,LOC104882049 | 4.56497  | 0.0940724 | 7.0254    |
| LOC100250918                           | 0.1563   | 0         | 2.20296   |
| LOC104882028                           | 0        | 0.662972  | 2.13325   |
| LOC104882116                           | 0        | 0.968937  | 1.46553   |
| LOC100266367                           | 0.267543 | 1.23356   | 19.4968   |
| LOC100254849                           | 4.76463  | 3.37624   | 0.961948  |
| LOC100254950                           | 193.405  | 373.765   | 939.256   |
| LOC100232980                           | 10.3675  | 6.51293   | 30.7963   |
| LOC100853820                           | 2.39568  | 3.79117   | 0.501358  |
| LOC100260554                           | 1.78691  | 3.33906   | 0.426444  |
| LOC100254045                           | 3.24693  | 29.6872   | 1.40139   |
| LOC100853675                           | 1.44707  | 3.62684   | 0.380112  |
| LOC100853526                           | 1.51568  | 2.83287   | 0.30619   |
| LOC100855299                           | 6.26942  | 18.9464   | 1.46349   |
| LOC100853406                           | 0.936026 | 3.70582   | 0.280861  |
| LOC100259991                           | 0.975037 | 5.69954   | 0.355234  |
| STS                                    | 5.67559  | 12.1468   | 0.719588  |
| LOC100253166                           | 6.04274  | 16.6164   | 0.260497  |
| LOC100263437                           | 21.9284  | 35.3435   | 0.976563  |
| LOC100258294                           | 6.47188  | 3.7005    | 0.326107  |
| LOC100246283                           | 1.30481  | 4.79012   | 0.664324  |
| LOC100266849                           | 3.95623  | 0.566949  | 0.0400277 |
| LOC100852886                           | 0.667903 | 3.02971   | 0.134228  |
| LOC100249839                           | 1.23692  | 9.37087   | 0.502     |
| STS                                    | 7.33082  | 26.401    | 0.434149  |
| LOC100256632                           | 68.7568  | 35.3304   | 14.2933   |
| LOC100247339                           | 37.2963  | 8.86187   | 8.88163   |
| LOC100249245                           | 7.42531  | 2.10464   | 27.8586   |
| LOC100256121                           | 17.2046  | 0.69222   | 3.14233   |
| LOC100250967                           | 301.574  | 192.821   | 24.5384   |
| LOC100242195                           | 2.80983  | 0.581287  | 0.540902  |
| LOC100242355                           | 0        | 0.129314  | 1.78109   |
| LOC104882218                           | 0        | 3.31134   | 3.37795   |
| LOC100256100,LOC100262982              | 41.0702  | 9.01881   | 10.0071   |
| LOC100245835                           | 4.03434  | 0.1187    | 0.265243  |
| LOC100254171                           | 9.9025   | 2.37375   | 0.542324  |
| LOC100268123                           | 0.704076 | 7.4275    | 1.85631   |
| LOC100257581                           | 16.886   | 72.1136   | 66.4565   |
| LOC104882178                           | 3.10763  | 0.0602798 | 0.485921  |
| LOC104877442                           | 0.306008 | 1.49834   | 2.83657   |
| CHIT3                                  | 0.569455 | 11.6514   | 0.725555  |
| LOC100262126                           | 1.82925  | 12.336    | 10.3915   |
| LOC100257019                           | 10.2764  | 46.5345   | 35.1706   |
| LOC100256922                           | 0.177781 | 1.47729   | 1.30162   |
| LOC100854711                           | 2.41651  | 0.593103  | 0.782601  |
| LOC100251011                           | 9.77778  | 14.9431   | 1.63357   |
| LOC100245376                           | 9.78377  | 13.8601   | 2.60845   |

|                           |          |          |          |
|---------------------------|----------|----------|----------|
| LOC100247971              | 0.11805  | 1.27777  | 0.528907 |
| LOC100854816              | 4.86456  | 4.66     | 0.871968 |
| LOC104877309              | 14.9939  | 3.84385  | 0.511479 |
| LOC100248613              | 3.82594  | 0.938554 | 0.983466 |
| LOC104877298              | 4.51238  | 19.7586  | 2.17963  |
| LOC100251999              | 0.524524 | 1.68224  | 3.70499  |
| LOC100854106              | 615.515  | 88.8307  | 279.06   |
| LOC100233032              | 6.54984  | 116.646  | 17.9778  |
| LOC100255514              | 55.2909  | 119.11   | 9.83628  |
| LOC100245291              | 0.146082 | 1.19484  | 0.348253 |
| LOC100258861              | 1.0223   | 3.45722  | 10.0361  |
| LOC100243857              | 34.9628  | 205.029  | 167.809  |
| LOC104882372              | 0        | 1.25092  | 1.48178  |
| LOC100242276              | 1.60071  | 13.4163  | 3.11535  |
| LOC100247409              | 0.763455 | 21.6603  | 13.0795  |
| LOC100252577,LOC100257713 | 1.62073  | 28.8895  | 10.0875  |
| LOC100262834              | 0.427991 | 3.2869   | 0.368973 |
| LOC100267921              | 15.8466  | 96.3359  | 98.0898  |
| LOC100254336              | 0.109723 | 0.474859 | 1.90175  |
| LOC100255963              | 2.11504  | 0.408533 | 0.57492  |
| LOC100252457              | 0.391201 | 0.178754 | 1.21779  |
| LOC100260988              | 0.217727 | 2.22168  | 0.680687 |
| LOC104882359              | 0.392222 | 2.16417  | 0.470198 |
| LOC100249181              | 0        | 1.7014   | 1.23215  |
| LOC100853697              | 0.420809 | 1.66865  | 4.20223  |
| LOC100255914              | 0.108402 | 0.866418 | 3.86214  |
| LOC100264510              | 0.528098 | 0.796303 | 6.90791  |
| LOC100242377              | 1.80442  | 8.11385  | 15.568   |
| LOC100247368              | 63.6833  | 20.9359  | 13.7879  |
| LOC100250869              | 1.4233   | 6.77731  | 3.85193  |
| LAR2                      | 3.91641  | 14.301   | 61.8249  |
| LOC100250060              | 0.170601 | 3.47708  | 0.718228 |
| LOC100248440              | 89.1097  | 155.406  | 375.339  |
| LOC100265634              | 0.266229 | 1.32185  | 1.39454  |
| LOC100260399              | 0.709728 | 2.32233  | 4.44528  |
| LOC100255336              | 0.439471 | 2.53615  | 0.5707   |
| LOC100248537              | 2.59731  | 2.28474  | 10.25    |
| LOC100248401              | 1.23856  | 1.20301  | 7.70095  |
| LOC104882305              | 3.07555  | 0.431897 | 0.674247 |
| LOC104882302              | 4.66566  | 0.310164 | 0.704089 |
| LOC100241539              | 6.00266  | 28.0379  | 42.7594  |
| LOC104882292              | 0.195594 | 3.51111  | 3.24361  |
| LOC100250236              | 0.407846 | 1.95743  | 3.90035  |
| LOC100250081              | 0.336924 | 1.77073  | 1.18587  |
| LOC100258813              | 4.64985  | 5.77526  | 1.39838  |
| LOC100241544              | 2.51108  | 0.827042 | 24.3924  |
| LOC100244957              | 0.311687 | 1.23965  | 4.43974  |

|                           |           |           |           |
|---------------------------|-----------|-----------|-----------|
| LOC104882285              | 1.42911   | 0         | 8.4803    |
| LOC104882284              | 0         | 3.56368   | 0.497179  |
| LOC100245004              | 0.767168  | 6.0902    | 7.99166   |
| LOC100250205              | 2.88669   | 9.06715   | 0.510394  |
| LOC100246848              | 0.657175  | 2.53306   | 2.66126   |
| LOC100262049              | 2.8659    | 1.3472    | 6.03863   |
| LOC100248480              | 0.442971  | 10.2775   | 0.833375  |
| LOC100241618              | 0.630234  | 3.5356    | 2.33074   |
| LOC100855230              | 0.81756   | 2.09658   | 9.23072   |
| LOC100243254              | 0.750657  | 0.478151  | 3.65645   |
| LOC100241660              | 22.3482   | 0.251062  | 2.45531   |
| LOC100246781              | 5.2301    | 1.21985   | 0.0634631 |
| LOC100265573              | 20.2858   | 5.70442   | 3.26207   |
| LOC100253504              | 0.265054  | 1.38384   | 0.201274  |
| LOC104882266              | 3.08419   | 5.25966   | 0.552883  |
| LOC104882265              | 48.3732   | 0         | 0         |
| LOC100252983              | 0         | 3.17855   | 0.114599  |
| LOC100242813              | 0.691008  | 4.4405    | 3.28464   |
| LOC100252799              | 0.104142  | 0.098735  | 1.47056   |
| LOC100263084              | 1.71593   | 4.63706   | 9.43643   |
| LOC100853688              | 1.66902   | 0         | 0.0691136 |
| LOC100261419,LOC104882445 | 0         | 0.0276702 | 1.95181   |
| LOC100257797              | 0.670934  | 1.17367   | 2.78936   |
| LOC104882374              | 2.62364   | 22.2192   | 6.32345   |
| LOC100261186              | 4.8581    | 3.39146   | 0.709225  |
| LOC100247469              | 0.878981  | 2.37462   | 0.525833  |
| LOC100252516              | 0.181207  | 3.21216   | 1.54073   |
| LOC100854389              | 0.384661  | 0.472815  | 5.41342   |
| LOC100260981              | 0.409171  | 1.32807   | 2.851     |
| LOC100266186              | 1.13815   | 4.87196   | 6.70674   |
| LOC100243863              | 1.55164   | 70.2525   | 57.4204   |
| LOC100247479              | 37.3043   | 5.03939   | 17.68     |
| LOC100262841              | 21.0783   | 4.57964   | 7.11591   |
| LOC100267995              | 0.888321  | 2.28757   | 6.94031   |
| LOC100250902              | 0         | 0.17509   | 1.02653   |
| LOC100243943              | 8.36383   | 1.80198   | 7.44042   |
| LOC100257806              | 6.33793   | 1.53635   | 4.14843   |
| LOC100267867              | 2.319     | 1.72193   | 0.514447  |
| LOC100852506              | 214.133   | 0.185851  | 0         |
| LOC100261069              | 0.179062  | 1.68893   | 1.07281   |
| LOC100243949              | 0.0856717 | 1.81639   | 1.7605    |
| LOC100259401              | 2.03509   | 0.381268  | 0.705076  |
| LOC100250750              | 0         | 0         | 1.64691   |
| LOC100242434              | 1.15404   | 28.3271   | 63.8223   |
| LOC100266447              | 1.58955   | 0.425364  | 5.40485   |
| LOC100852784              | 1.45813   | 6.53974   | 6.10948   |
| LOC104882351              | 0.419659  | 6.01556   | 2.71224   |

|                           |           |           |           |
|---------------------------|-----------|-----------|-----------|
| LOC100259493              | 2.00101   | 9.64637   | 1.22679   |
| LOC100264668              | 0.164409  | 3.62744   | 0.0625543 |
| LOC100242382              | 0.387917  | 10.3226   | 1.86342   |
| LOC100266297              | 1.51613   | 13.0399   | 4.16618   |
| LOC104882342              | 0.274299  | 2.12269   | 2.16416   |
| LOC100249139              | 10.6087   | 0         | 0.18915   |
| LOC100259359              | 7.75369   | 0.163867  | 1.16371   |
| LOC104882340              | 1.14587   | 0         | 0.661578  |
| LOC100242440              | 1.60723   | 3.02223   | 22.7176   |
| LOC100247390              | 1.89652   | 2.14633   | 0.264373  |
| LOC100250718              | 2.39876   | 0.490642  | 0.724465  |
| LOC100259516              | 0.414692  | 4.1098    | 0.250333  |
| LOC104882328              | 3.0873    | 17.3268   | 4.70699   |
| LOC100268098              | 4.94888   | 13.127    | 2.93033   |
| LOC100263971              | 43.5838   | 107.059   | 215.539   |
| LOC100253660              | 232.252   | 1055.58   | 251.392   |
| LOC100263850              | 3.85606   | 0.616538  | 9.30303   |
| LOC100258695              | 3.8637    | 4.62859   | 1.09745   |
| LOC100245018              | 2.06768   | 5.75797   | 0.720824  |
| LOC100246789              | 0         | 0.0769343 | 1.13141   |
| LOC104882407              | 3.07925   | 0         | 0         |
| LOC100246665              | 2.12283   | 8.87733   | 4.30971   |
| LOC100852956              | 32.863    | 6.42848   | 46.6958   |
| LOC100265518              | 0         | 0.215722  | 2.21104   |
| LOC100253651              | 0.100285  | 0.152226  | 2.37911   |
| LOC100243281              | 1.26961   | 0         | 5.7774    |
| LOC100260306              | 2.70595   | 0.312408  | 0.37849   |
| LOC100257032              | 3.39361   | 16.5956   | 3.96802   |
| LOC100246821              | 0.175943  | 3.55937   | 7.95367   |
| LOC100257111              | 0.267647  | 0.173994  | 4.65067   |
| LOC100241613              | 0.0930555 | 1.3139    | 0.314227  |
| LOC100852763              | 0.508016  | 3.11626   | 4.42399   |
| LOC100267280              | 1.02834   | 4.01743   | 4.2795    |
| LOC100242398              | 2.52053   | 15.8903   | 14.2797   |
| LOC104882428              | 0         | 2.15209   | 0         |
| LOC100258099              | 0.34552   | 3.81219   | 0.752666  |
| LOC100242793              | 3.49467   | 0.397541  | 2.19774   |
| LOC100247939              | 3.96292   | 16.4287   | 7.52749   |
| LOC100250689              | 1.55213   | 0.46227   | 2.80485   |
| LOC100260938              | 3.95795   | 0.19168   | 0.823658  |
| LOC100248971              | 2.16956   | 0.806749  | 21.1209   |
| LOC100252389              | 8.71026   | 4.80372   | 37.0906   |
| LOC100266033              | 0.267119  | 0.748254  | 1.21156   |
| LOC100252368              | 0.179618  | 1.57923   | 2.1074    |
| LOC100262628,LOC104882465 | 0.841539  | 18.0479   | 2.29041   |
| LOC100267796              | 0.607763  | 5.25676   | 1.19993   |
| LOC100259038              | 0.542881  | 1.06771   | 2.39736   |

|                                        |           |          |          |
|----------------------------------------|-----------|----------|----------|
| LOC100233023                           | 4.64823   | 26.112   | 7.67586  |
| LOC100854472                           | 156.197   | 53.1451  | 241.722  |
| LOC100262645                           | 0.0584104 | 0        | 3.22646  |
| LOC100259041                           | 48.3798   | 27.526   | 149.89   |
| LOC100264214                           | 18.2094   | 5.79353  | 34.1724  |
| LOC100242154                           | 0.782192  | 1.91917  | 4.71448  |
| LOC100247293                           | 1.1236    | 0.32381  | 4.03395  |
| LOC100854240                           | 0.228089  | 0.754969 | 1.07318  |
| LOC100232945                           | 2.42364   | 0.521939 | 4.74231  |
| LOC104882493                           | 0.277838  | 2.02356  | 0.108786 |
| LOC100267723                           | 7.89399   | 18.4549  | 41.6557  |
| LOC100243668                           | 15.0358   | 5.87684  | 32.5991  |
| LOC100243687                           | 41.4068   | 70.5006  | 201.382  |
| LOC100257555                           | 2.71922   | 12.5393  | 20.6312  |
| LOC100245416                           | 1.23655   | 29.2522  | 10.2935  |
| LOC100267722                           | 18.9386   | 90.3989  | 22.2044  |
| LOC100255717                           | 0.288028  | 1.83634  | 0.229332 |
| LOC100259057                           | 3.77329   | 17.4831  | 10.4755  |
| LOC100260898                           | 3.76528   | 16.3812  | 12.0411  |
| LOC100257444                           | 2.55252   | 2.91694  | 43.9467  |
| LOC100257455                           | 307.67    | 1909.09  | 2633.84  |
| LOC100255729                           | 19.0227   | 111.641  | 78.3054  |
| LOC100250666                           | 0.35105   | 2.94634  | 3.40488  |
| LOC100266006                           | 0         | 2.05421  | 0.024798 |
| LOC100255844                           | 2.14116   | 1.40686  | 7.16654  |
| LOC100259070                           | 28.5216   | 5.90855  | 14.9719  |
| LOC100250675                           | 8.55646   | 2.66237  | 14.2511  |
| LOC100243808                           | 10.6688   | 60.6418  | 7.64519  |
| LOC100267755                           | 0.0323071 | 1.84492  | 0.329805 |
| LOC100855129                           | 0.0741997 | 0.572454 | 16.1501  |
| LOC100257363                           | 0.330286  | 0.281856 | 3.51594  |
| LOC100248962                           | 0         | 6.13438  | 4.40385  |
| LOC100259186                           | 0.281469  | 18.2971  | 9.53794  |
| LOC100241978                           | 2.56341   | 1.13118  | 0.131214 |
| LOC100259078                           | 32.486    | 100.211  | 22.7874  |
| IFRL4                                  | 5.79566   | 61.0439  | 18.44    |
| LOC100232901                           | 66.5203   | 3.54168  | 237.093  |
| LOC100262619                           | 0.705856  | 6.33623  | 0.389394 |
| LOC100267776                           | 7.32706   | 29.8147  | 5.99621  |
| LOC100253967                           | 0.466675  | 1.69156  | 0.169704 |
| LOC100242084                           | 0.174119  | 0.16288  | 1.5196   |
| LOC100243853                           | 6.66654   | 0        | 6.27874  |
| LOC100249003                           | 1.76774   | 5.58365  | 8.42347  |
| LOC100259227                           | 3.80626   | 1.24433  | 7.51793  |
| LOC100245479,LOC100257502,LOC100262635 | 32.6948   | 6.96109  | 99.9771  |
| LOC100267792                           | 6.5388    | 1.44574  | 9.01272  |
| LOC100262607                           | 3.25031   | 2.16148  | 9.1229   |



|                           |           |          |          |
|---------------------------|-----------|----------|----------|
| LOC100245451              | 1.73523   | 0.409286 | 11.3212  |
| LOC100250578              | 4.98248   | 3.33045  | 17.6416  |
| LOC104882584              | 4.55796   | 43.3458  | 7.73672  |
| LOC100259232              | 31.2245   | 0.643518 | 0.726148 |
| ADH3                      | 84.6525   | 46.9575  | 196.008  |
| LOC100248978,LOC100254084 | 20.5742   | 94.6603  | 154.445  |
| LOC100259201              | 7.44501   | 88.6593  | 25.4299  |
| LOC100854780              | 1.99308   | 0.292568 | 0.781844 |
| LOC100247883              | 0         | 1.28788  | 0.141181 |
| LOC100265028              | 2.61636   | 33.5168  | 14.2653  |
| VVSUC27                   | 4.8508    | 2.12852  | 11.4995  |
| LOC104882634              | 0         | 0.182    | 1.24244  |
| LOC104882655              | 0         | 7.4223   | 0        |
| LOC104882647              | 2.06162   | 0        | 0        |
| LOC100240827              | 9.60098   | 8.24877  | 109.956  |
| LOC100264185              | 4.24064   | 32.2716  | 17.3806  |
| LOC100247045              | 0         | 1.65655  | 4.46958  |
| LOC100261816              | 0.460672  | 1.48333  | 1.91019  |
| LOC100246262              | 1.89426   | 0.108981 | 0.150125 |
| LOC100261094,LOC104882700 | 1.87815   | 9.53605  | 4.53768  |
| LOC100855105              | 4.30757   | 61.6273  | 87.7083  |
| LOC100259650              | 1.46934   | 15.8254  | 14.4868  |
| LOC100248240              | 3.0084    | 6.20542  | 0.136413 |
| LOC100256879              | 1.08372   | 1.01571  | 0        |
| LOC100246044              | 2.3652    | 1.05402  | 9.45973  |
| LOC104882765              | 41.8728   | 16.6583  | 8.6296   |
| LOC100259577              | 12.9136   | 0.33001  | 0        |
| LOC104882755              | 25.3809   | 4.63009  | 14.711   |
| LOC100249918              | 6.16459   | 0.024326 | 0        |
| LOC100263848              | 0.417508  | 2.09426  | 0.743443 |
| LOC100241404              | 6.21892   | 1.00672  | 0.324496 |
| LOC100232974              | 46.6882   | 53.6913  | 10.2385  |
| LOC100256900              | 0.249935  | 11.1138  | 1.34828  |
| LOC100261993              | 0.208449  | 5.20881  | 3.39889  |
| LOC100267167              | 0.142098  | 1.84832  | 0.261323 |
| LOC100249990              | 0.0336245 | 5.10409  | 0.190623 |
| LOC100253312              | 0.0184934 | 1.52622  | 0        |
| LOC100854143              | 0.341396  | 2.94264  | 6.21828  |
| LOC100263585              | 1.91302   | 3.58531  | 8.84922  |
| LOC100243141              | 4.1075    | 1.66618  | 0.550582 |
| LOC100240987              | 2.09976   | 6.92472  | 8.99149  |
| LOC100247851              | 1.18386   | 1.27631  | 13.3164  |
| LOC100242785              | 0.243489  | 1.9348   | 0.185375 |
| LOC100258104              | 0.32177   | 0.531025 | 1.30408  |
| LOC100244431              | 2.37973   | 0.929434 | 0.568653 |
| LOC104882457              | 0.61256   | 0        | 8.40238  |
| LOC100252353              | 0.642081  | 2.12623  | 2.79086  |

|                           |           |          |           |
|---------------------------|-----------|----------|-----------|
| LOC100259216              | 14.3866   | 0.288255 | 1.7466    |
| LOC100264396              | 4.8193    | 0.769035 | 2.60092   |
| LOC100260772              | 2.55761   | 11.6547  | 7.77945   |
| LOC100267819              | 1.14938   | 4.27365  | 0.869538  |
| LOC100243769              | 0.149247  | 1.4783   | 12.6456   |
| LOC100233023              | 4.03771   | 5.42501  | 19.3819   |
| LOC100262668              | 3.32708   | 3.08928  | 14.8874   |
| LOC100242128              | 0.0636099 | 2.94294  | 0.249155  |
| LOC100266093              | 69.5553   | 205.928  | 532.656   |
| LOC100243675              | 2.20243   | 0.139    | 0.10734   |
| LOC100248812              | 5.39458   | 0.171105 | 0.291808  |
| LOC100267809              | 40.533    | 10.0717  | 15.2297   |
| LOC100255823              | 0.927098  | 0.442099 | 3.49125   |
| LOC100250619              | 2.53604   | 0.284607 | 1.65846   |
| LOC100260880              | 4.4222    | 1.61036  | 7.90507   |
| LOC100247181              | 0.584813  | 2.9462   | 2.65112   |
| LOC100243785              | 9.83764   | 0.532542 | 5.6518    |
| LOC104882515              | 5.30716   | 0.958377 | 3.95806   |
| LOC104882517              | 14.0489   | 29.0107  | 5.20121   |
| LOC100854033              | 3.75196   | 1.02039  | 6.55302   |
| LOC100253922              | 0.285091  | 0.722172 | 6.42234   |
| LOC100254044              | 4.31873   | 1.91041  | 0.656388  |
| LOC100242059              | 155.007   | 70.4629  | 20.5572   |
| LOC100257562              | 0.342942  | 0.578308 | 1.44347   |
| LOC100243702              | 1.62381   | 3.23899  | 18.0654   |
| LOC100241962              | 12.6103   | 13.1188  | 68.4759   |
| LOC100266120              | 0.261385  | 0.252991 | 1.2601    |
| LOC100254056              | 0.54373   | 0.94425  | 2.47822   |
| LOC100255742              | 2.43379   | 0.361174 | 3.34711   |
| LOC100264254              | 0.0935517 | 0.770992 | 6.17607   |
| LOC100257359              | 32.7822   | 7.14618  | 9.3735    |
| LOC100257474              | 2.65851   | 7.57757  | 1.60976   |
| LOC100262602              | 4.05525   | 0.982634 | 0.516786  |
| LOC100250571              | 8.95191   | 0.789081 | 0.254926  |
| LOC100260826              | 1.3737    | 9.02063  | 3.12712   |
| LOC100257468              | 2.10534   | 17.8625  | 18.8305   |
| LOC100253937              | 5.54556   | 0.937826 | 4.15061   |
| LOC100257377              | 3.6395    | 3.01193  | 0.823806  |
| LOC100255862,LOC100260930 | 6.06452   | 3.69998  | 0.250136  |
| LOC100852518              | 0.32734   | 5.33136  | 2.09103   |
| LOC100267760              | 0.293259  | 0.400113 | 14.8753   |
| LOC100255764              | 539.22    | 126.213  | 101.813   |
| LOC100266040              | 29.3117   | 25.9992  | 108.12    |
| LOC104882566              | 0.398471  | 1.65117  | 2.40735   |
| LOC100266024              | 0.501659  | 3.66775  | 3.26245   |
| LOC100255866              | 1.2312    | 11.0458  | 0.0612253 |
| LOC100260935              | 88.9934   | 49.0468  | 2.63319   |

|                           |           |           |           |
|---------------------------|-----------|-----------|-----------|
| LOC100254074              | 8.53912   | 14.5776   | 2.52816   |
| LOC100266028              | 21.2603   | 14.9639   | 87.0986   |
| LOC100248859              | 0         | 0         | 1.11079   |
| LOC100249009              | 5.33177   | 0.60207   | 1.05455   |
| LOC100255793              | 2.64605   | 4.19511   | 0.42611   |
| LOC100245373              | 0.197471  | 3.54657   | 0.341917  |
| ADH1                      | 9.88053   | 42.4824   | 22.6816   |
| LOC100252383              | 0.501664  | 0.904298  | 3.47997   |
| LOC100262647              | 0.522451  | 0.969426  | 5.75966   |
| LOC100242094              | 5.34715   | 2.2684    | 0.304506  |
| LOC104882629              | 2.09202   | 0         | 0         |
| LOC104882628              | 0.738509  | 4.33736   | 1.90093   |
| LOC100853071              | 3.27758   | 3.13352   | 0         |
| LOC100266619              | 0.349531  | 3.51713   | 0.156696  |
| LOC100247483              | 0.34439   | 1.56757   | 11.0652   |
| LOC100266412              | 0.566651  | 1.97018   | 4.63321   |
| LOC100250966              | 3.54181   | 19.5077   | 14.5787   |
| LOC100253881,LOC104882696 | 1.40362   | 6.39148   | 0.281529  |
| LOC104882688              | 0.0637836 | 2.04526   | 10.1059   |
| LOC100854843              | 0.387872  | 0.687277  | 4.68071   |
| LOC100262406              | 1.20739   | 5.11783   | 1.7893    |
| LOC100260625              | 2.27371   | 14.3207   | 4.2304    |
| LOC100243972              | 1.49938   | 0.857925  | 0.193394  |
| LOC100249129              | 0.960052  | 11.2107   | 9.75881   |
| LOC100242381              | 1.8111    | 0.0403712 | 0         |
| LOC104882732              | 0.94308   | 6.83996   | 14.5935   |
| LOC100256299              | 8.27163   | 25.0789   | 35.1574   |
| LOC100251158              | 0.258091  | 15.1383   | 0.473709  |
| LOC100855175              | 0.118972  | 5.05291   | 0.351098  |
| LOC100261322              | 10.8515   | 4.29651   | 1.14533   |
| LOC104882763              | 7.10946   | 6.14359   | 59.0927   |
| LOC100249337              | 0.292481  | 0.476622  | 4.20394   |
| LOC100853111              | 0.201196  | 0.421372  | 20.0979   |
| LOC104882750              | 0         | 4.22092   | 7.82943   |
| LOC100248194,LOC100256743 | 8.57699   | 4.87293   | 0.535975  |
| LOC104882746              | 1.46774   | 0         | 0         |
| LOC100250024              | 2.88726   | 0.795468  | 0.628065  |
| LOC100251634              | 0.442107  | 5.54895   | 1.92048   |
| LOC100261979              | 8.09937   | 5.99702   | 53.1258   |
| LOC100243063              | 4.47792   | 17.3783   | 0.0767998 |
| LOC104877454              | 15.6646   | 2.20489   | 1.48888   |
| LOC100265345              | 22.4278   | 35.1057   | 8.21731   |
| LOC100255640              | 10.2889   | 4.75121   | 28.3084   |
| LOC100262364              | 48.0449   | 71.1348   | 2.44982   |
| LOC100255540              | 1.59318   | 0.294339  | 1.99146   |
| LOC100245127              | 1.0407    | 0.512349  | 2.30101   |
| LOC100245140              | 8.56192   | 18.9971   | 3.43097   |

|                                        |          |           |           |
|----------------------------------------|----------|-----------|-----------|
| LOC100854036                           | 2.18536  | 5.38159   | 0.40365   |
| LOC104877559                           | 1.45724  | 18.2129   | 1.43738   |
| LOC104877559                           | 2.86182  | 65.3873   | 4.46208   |
| LOC100250269                           | 1.34011  | 0.177667  | 0.202696  |
| LOC100247002                           | 13.555   | 9.82206   | 44.2539   |
| LOC104877523                           | 0.359843 | 2.81425   | 1.31639   |
| LOC104877525                           | 0        | 0         | 1.97514   |
| LOC104877564                           | 0        | 8.81351   | 0.291083  |
| LOC104877349,LOC104877408              | 2.60484  | 3.15197   | 0         |
| LOC100245158                           | 2.3342   | 1.13738   | 0.419648  |
| LOC100262419,LOC104877363,LOC104877572 | 0.657161 | 2.92088   | 11.7188   |
| LOC100255581                           | 0.305591 | 3.21045   | 2.24127   |
| LOC100258992                           | 81.8613  | 24.3655   | 13.8426   |
| LOC100854699                           | 1.22247  | 7.38527   | 1.87681   |
| LOC100243502                           | 0.567307 | 2.23052   | 4.71919   |
| LOC100248576                           | 0        | 2.04183   | 4.60167   |
| LOC100260669                           | 0.323618 | 2.51767   | 1.7648    |
| LOC104877542                           | 1.83785  | 5.7521    | 1.13936   |
| LOC100253691                           | 0        | 0.487576  | 4.79234   |
| LOC100855066                           | 3.38818  | 3.68908   | 18.4473   |
| LOC100255502                           | 6.97692  | 3.45139   | 14.2284   |
| LOC100259000                           | 11.7626  | 27.1591   | 5.53768   |
| LOC100257132                           | 2164.82  | 18813.2   | 2214.16   |
| LOC100253748                           | 1058.06  | 2920.04   | 566.985   |
| LOC100258895                           | 19.3716  | 65.6633   | 122.382   |
| LOC100243010                           | 6.20333  | 1.62108   | 6.8996    |
| LOC100263526                           | 0.795751 | 4.46048   | 26.5756   |
| LOC100251431                           | 3.9049   | 0.72194   | 4.56314   |
| LOC100260079                           | 140.291  | 20.1161   | 69.7446   |
| LOC100246366                           | 0.380649 | 2.83624   | 1.01343   |
| LOC100256628                           | 0.703322 | 1.58246   | 0.306504  |
| LOC100852799                           | 0.606643 | 3.8648    | 7.45973   |
| LOC104877649                           | 4.59543  | 2.50661   | 0.300354  |
| LOC100248372                           | 0.370478 | 4.89731   | 5.30834   |
| LOC100262772                           | 1884.33  | 99.4241   | 490.167   |
| LOC104877726                           | 2.41927  | 0.280528  | 0         |
| LOC100254975                           | 5.79456  | 15.4112   | 25.9167   |
| LOC100264177                           | 5.46728  | 80.1097   | 23.9586   |
| LOC100248356                           | 0.854232 | 2.33096   | 5.20825   |
| LOC100264502                           | 0.828672 | 5.38846   | 0.823273  |
| LOC104877788                           | 2.3824   | 1.29452   | 0.256276  |
| LOC100252621                           | 0.384837 | 2.2093    | 0.365382  |
| LOC104877760                           | 0.989344 | 3.7868    | 0.348205  |
| LOC100268036                           | 3.09432  | 1.78424   | 0.270855  |
| LOC100261089                           | 0.13939  | 6.66434   | 0.216284  |
| LOC100241033,LOC100251285              | 2.80558  | 0.0305913 | 0.0291544 |
| LOC104877752                           | 0        | 2.36684   | 0         |

|                           |           |          |          |
|---------------------------|-----------|----------|----------|
| LOC100259870              | 0.753393  | 6.27807  | 3.6715   |
| LOC104877808              | 1.14468   | 0        | 0.38322  |
| LOC100249646              | 0.260648  | 0.875964 | 1.63948  |
| LOC104877797              | 0.518598  | 0.737005 | 2.45972  |
| LOC100243362              | 0.477268  | 1.68094  | 3.16392  |
| LOC100256921              | 0.462379  | 2.61567  | 5.84022  |
| LOC100245214              | 2.19855   | 3.46742  | 11.5727  |
| LOC100257142              | 0.223206  | 1.37401  | 0.612534 |
| LOC100243598              | 6.08041   | 37.5109  | 1.7875   |
| LOC100257253              | 73.3373   | 80.6805  | 355.171  |
| LOC100252144              | 12.2849   | 2.51529  | 0.856021 |
| LOC100258873              | 31.1838   | 13.6952  | 55.4563  |
| LOC100241782,LOC100255645 | 81.8902   | 33.9672  | 8.20464  |
| LOC100257280              | 0.69819   | 3.52577  | 1.23849  |
| LOC100264076              | 28.4977   | 5.47478  | 15.8519  |
| LOC100250352              | 2.95486   | 12.4873  | 16.0547  |
| LOC100265853              | 3.49143   | 14.8927  | 11.4112  |
| LOC104877527              | 0         | 1.29542  | 0.476347 |
| LOC104877575              | 0.438037  | 3.21171  | 0.991933 |
| LOC100257312              | 0.613656  | 5.64524  | 0.139312 |
| LOC100267579              | 0.803878  | 2.60596  | 7.29179  |
| LOC100245275              | 0         | 0        | 2.30849  |
| LOC104877540              | 0         | 10.5561  | 73.8475  |
| LOC104877544              | 0.231676  | 12.3744  | 0.391135 |
| LOC100258946              | 3.65394   | 13.1339  | 18.537   |
| LOC104877584              | 10.2467   | 12.5726  | 2.74375  |
| LOC100265937              | 1.91665   | 6.70213  | 11.1459  |
| LOC100255495              | 0.655189  | 10.2809  | 3.75567  |
| LOC104877588              | 0.645028  | 20.2596  | 3.21593  |
| LOC100245306              | 18.3352   | 4.38527  | 13.521   |
| LOC100265899              | 7.01531   | 2.29339  | 1.03594  |
| LOC100257234              | 8.84786   | 0.640776 | 1.7647   |
| LOC100260574              | 0.0432198 | 0.219463 | 3.08302  |
| LOC100265792              | 0.403681  | 0.323496 | 2.7632   |
| LOC100265300,LOC104877656 | 3.16854   | 5.42442  | 0.854612 |
| LOC100260095              | 16.7729   | 79.2907  | 19.9641  |
| LOC100248132              | 0.322521  | 1.1437   | 1.31487  |
| LOC100242996              | 3.35782   | 16.0857  | 10.1336  |
| LOC100853612              | 1.48632   | 0.126936 | 3.72546  |
| LOC104877637              | 0         | 0        | 0.903029 |
| LOC104877636              | 0.289101  | 0.891595 | 2.35218  |
| LOC100242885              | 0.091098  | 0        | 1.34988  |
| LOC104877640              | 2.11735   | 1.38668  | 11.9237  |
| LOC104877680              | 0         | 21.4202  | 0        |
| LOC100255558              | 0.069698  | 14.9558  | 0        |
| LOC100256345              | 88.4667   | 9.2447   | 10.1024  |
| LOC100232878              | 32.701    | 8.44127  | 123.698  |

|                               |           |          |           |
|-------------------------------|-----------|----------|-----------|
| LOC104877716                  | 0.456254  | 0        | 10.9167   |
| LOC100257648                  | 19.8977   | 1.52599  | 27.6808   |
| LOC100262655                  | 6.47462   | 1.17213  | 12.8042   |
| LOC100257609,LOC100852663     | 13.8569   | 2.25854  | 3.41052   |
| LOC100855352                  | 9.10567   | 9.7906   | 60.5866   |
| LOC104877780                  | 1.40208   | 0        | 6.26832   |
| LOC100249639,LOC104877773     | 0.345811  | 0.154428 | 4.3707    |
| LOC100256445                  | 1.64578   | 0.286152 | 0.304205  |
| LOC100258085                  | 0.0421429 | 0.570072 | 10.7704   |
| LOC100251296                  | 0.194071  | 2.28446  | 2.17162   |
| LOC100261538                  | 0.115583  | 1.84409  | 0.0826877 |
| LOC100263791                  | 16.762    | 1.22241  | 2.04372   |
| LOC100246744                  | 0.484325  | 1.2446   | 5.18194   |
| LOC100265661                  | 28.942    | 6.64598  | 7.70364   |
| LOC100258716                  | 0.656623  | 5.55515  | 5.77911   |
| LOC100241699                  | 1.76361   | 11.2901  | 1.19424   |
| LOC100246818                  | 0         | 4.21936  | 0.222823  |
| LOC100243329                  | 0.0727507 | 0.192418 | 1.15851   |
| LOC100258609                  | 0.257058  | 0.348993 | 1.17512   |
| LOC100248471                  | 23.74     | 87.7844  | 20.074    |
| LOC100241597                  | 21.2437   | 4.81082  | 17.078    |
| LOC100259874                  | 126.808   | 43.3926  | 178.794   |
| LOC100253121                  | 0.266748  | 2.13365  | 0.0319263 |
| LOC100249566                  | 1.12324   | 8.18004  | 16.1003   |
| VVYS1                         | 563.235   | 73.4204  | 75.4116   |
| LOC100259860                  | 5.66743   | 0.598857 | 1.02827   |
| LOC100259927                  | 0.27836   | 2.44053  | 1.42925   |
| LOC100256431                  | 3.35067   | 1.50746  | 7.08057   |
| LOC100242748                  | 13.2664   | 5.1171   | 2.48817   |
| LOC100241107                  | 1.22528   | 5.66669  | 1.20666   |
| LOC100266710                  | 0.806787  | 1.78288  | 0.441265  |
| LOC100242765                  | 31.7667   | 33.4984  | 2.87784   |
| LOC100244399                  | 0.584598  | 1.37943  | 6.45932   |
| LOC100246131                  | 68.2158   | 21.9261  | 6.08891   |
| LOC100244444                  | 0.179788  | 1.09588  | 0.145878  |
| LOC100244461                  | 0         | 1.98488  | 35.6881   |
| LOC100249610                  | 0         | 3.57586  | 21.0962   |
| LOC100254732                  | 0         | 2.48552  | 10.3917   |
| LOC100259841                  | 0.0525714 | 1.66769  | 32.0018   |
| LOC100242737,LOC100246096,TL3 | 23182.7   | 3959.21  | 3778.74   |
| TL1                           | 4081.04   | 369.343  | 1163.28   |
| LOC100263272                  | 993.131   | 593.526  | 55.5525   |
| LDOX                          | 2009.94   | 509.755  | 170.896   |
| GFH2                          | 12.846    | 34.084   | 171.686   |
| LOC100251344                  | 23.4269   | 9.1475   | 47.1372   |
| LOC100267708                  | 4.10279   | 1.0441   | 6.44218   |
| LOC100855263                  | 2.24196   | 4.37656  | 10.7352   |

|                           |           |           |          |
|---------------------------|-----------|-----------|----------|
| LOC100259241              | 0.888929  | 7.65178   | 0.786974 |
| LOC100243800              | 35.6737   | 98.8589   | 21.3237  |
| LOC100255790              | 32.371    | 43.4596   | 238.441  |
| LOC100242080              | 0.384848  | 1.4921    | 3.37723  |
| LOC100254114              | 0.194323  | 7.71353   | 17.0077  |
| LOC100259234              | 0         | 1.31109   | 0        |
| LOC100264277              | 5.49121   | 0         | 0        |
| LOC100240765              | 0.640526  | 1.28293   | 0        |
| LOC100249859              | 201.991   | 0         | 1.47897  |
| LOC100242620              | 110.974   | 2.13102   | 0.647792 |
| LOC104877515              | 49.7246   | 5.13069   | 1.18002  |
| LOC104877539              | 0.421478  | 2.5329    | 0.577784 |
| LOC100245856              | 18.8034   | 129.298   | 530.457  |
| LOC100261349              | 8.58801   | 20.0601   | 57.8815  |
| LOC100267372              | 7.01861   | 3.34057   | 15.2812  |
| LOC100253460              | 20.3527   | 2.91979   | 2.71153  |
| LOC100243235              | 0.51964   | 5.9368    | 17.9905  |
| LOC100248364              | 0.587403  | 3.54064   | 0.78045  |
| LOC100243221,LOC100265535 | 5.40312   | 0.37265   | 0.382561 |
| LOC104881234              | 0.619609  | 0.914523  | 4.44335  |
| LOC104881245              | 1.67736   | 0.697431  | 3.06934  |
| LOC100253577              | 6.51047   | 32.8133   | 21.9614  |
| LOC100265543              | 9.70389   | 2.46146   | 1.39049  |
| LOC100249570              | 104.967   | 19.3869   | 33.8724  |
| LOC100266728              | 2.41992   | 10.0342   | 8.87108  |
| LOC104881495              | 0         | 0.629222  | 1.97014  |
| LOC104881931              | 0         | 1.71368   | 13.1727  |
| LOC100232921              | 25.0405   | 143.627   | 23.7217  |
| LOC100246227              | 8.9879    | 13.703    | 74.9184  |
| LOC100251364              | 4.81481   | 2.6852    | 28.5327  |
| LOC100261608              | 0.398734  | 2.36367   | 2.31809  |
| PIP1%3B3                  | 1246.9    | 510.711   | 2528.7   |
| LOC100247828              | 0.197834  | 1.42201   | 1.55061  |
| LOC100256474              | 4.38659   | 8.71573   | 20.5049  |
| LOC100265094              | 0.236496  | 0.352436  | 1.35888  |
| LOC104881793              | 1.17942   | 6.02068   | 6.36939  |
| LOC100252995              | 0.788476  | 6.42691   | 9.88129  |
| LOC100854222              | 32.6242   | 7.64406   | 15.4304  |
| LOC100262548              | 8.36382   | 7.34582   | 42.7414  |
| LOC100241232              | 44.7985   | 6.76901   | 43.9615  |
| LOC100259122              | 0.977657  | 0.0504722 | 23.113   |
| LOC100262648              | 0.160682  | 0         | 1.8688   |
| LOC100267804              | 0         | 0.908333  | 2.6159   |
| LOC100243757              | 5.83555   | 0.569727  | 3.08223  |
| LOC100253999              | 2.00176   | 0.354082  | 5.72072  |
| LOC100260753              | 0.0438581 | 0.144051  | 2.22247  |
| LOC104882174              | 9.05647   | 0         | 0        |

|                           |           |           |          |
|---------------------------|-----------|-----------|----------|
| LOC100853134              | 7.72824   | 0.109398  | 0        |
| LOC104882186              | 0         | 1.20132   | 0        |
| LOC100248732              | 7.34326   | 4.60296   | 1.41376  |
| LOC100243854              | 1.49025   | 1.04441   | 11.899   |
| LOC100266064              | 0.520632  | 6.65674   | 13.2776  |
| LOC100248894              | 0.248336  | 0.985206  | 1.9371   |
| LOC100253987              | 71.9376   | 74.4125   | 9.20127  |
| LOC100248986              | 32.2361   | 15.4415   | 0.498605 |
| LOC100264388              | 0.258667  | 1.18987   | 0.163696 |
| LOC100261471              | 4.12491   | 1.32929   | 0.820311 |
| LOC100263035              | 1.02456   | 0.032302  | 10.3982  |
| LOC100243193              | 0.367396  | 4.09434   | 0.543842 |
| LOC100232838              | 171.372   | 71.3476   | 36.7427  |
| LOC100853472              | 102.307   | 36.1255   | 22.4651  |
| LOC100853652              | 365.503   | 25.814    | 5.55073  |
| LOC100253338              | 1.12447   | 0.310996  | 0        |
| LOC100248203              | 15.2542   | 0.0357191 | 0        |
| LOC100265384              | 5.56281   | 33.6961   | 1.12861  |
| LOC100252759              | 0.195714  | 0.521755  | 6.59003  |
| LOC100266675              | 11.5742   | 0.557244  | 2.62886  |
| LOC100257911              | 0.436062  | 0.139733  | 1.53751  |
| LOC104882747              | 0         | 2.47825   | 7.19077  |
| LOC100252878              | 30.0755   | 78.1746   | 18.7141  |
| LOC100251220              | 0.811336  | 0.399162  | 3.50203  |
| HYD2                      | 3.46403   | 9.17759   | 19.8826  |
| LOC100242493              | 1.09369   | 1.37739   | 5.00064  |
| LOC100244332              | 4.57699   | 10.3516   | 0.913288 |
| LOC100247745              | 0.5436    | 2.3304    | 3.13715  |
| LOC100251100              | 14.2035   | 9.63489   | 1.32786  |
| LOC100252859              | 24.3663   | 13.4913   | 0.412537 |
| LOC104878760              | 0.13528   | 11.1432   | 0.622469 |
| LOC100250277              | 3.67686   | 2.3348    | 0.674031 |
| LOC100265851              | 4.65217   | 0         | 4.54642  |
| LOC100250384              | 9.03627   | 1.89325   | 15.18    |
| LOC100246872              | 7.40345   | 1.24076   | 21.2049  |
| LOC100253871,LOC100264029 | 22.1311   | 0.218517  | 1.36739  |
| LOC100243412              | 10.3922   | 0         | 2.56365  |
| LOC100258859              | 1.5345    | 0         | 0.297235 |
| LOC100267506              | 1156.82   | 194.022   | 427.437  |
| LOC100250374              | 0         | 0         | 1.15082  |
| LOC100854771              | 35.8689   | 17.3274   | 80.442   |
| LOC100257341              | 6.06053   | 26.2294   | 34.5875  |
| LOC100248597              | 0.0759624 | 0.414835  | 385.124  |
| LOC100250364              | 1.24751   | 0.755359  | 10.1867  |
| LOC100262451              | 9.78892   | 1.45929   | 1.42216  |
| LOC100241875              | 6.64421   | 8.23443   | 0.923113 |
| LOC104878763              | 10.9351   | 3.13166   | 1.82187  |



|                           |          |           |           |
|---------------------------|----------|-----------|-----------|
| LOC100245113              | 0.25868  | 0.0679855 | 2.55312   |
| LOC104878761              | 0.346626 | 0.673159  | 1.39741   |
| LOC100853712              | 0        | 3.04231   | 0.0913458 |
| LOC100853320              | 47.6773  | 14.825    | 109.942   |
| LOC100852969              | 5.96796  | 0.992821  | 120.306   |
| LOC100253828              | 0.566732 | 2.42396   | 1.14474   |
| LOC100245283              | 0        | 0.719521  | 1.45804   |
| LOC104878800              | 0.663114 | 0.662351  | 3.13953   |
| LOC100255508              | 3.40652  | 1.77784   | 0.557454  |
| LOC100252188,LOC100258826 | 63.6195  | 11.102    | 3.72021   |
| LOC100263992              | 576.369  | 318.987   | 4.25737   |
| LOC100248570              | 0.447215 | 4.27753   | 0.0200964 |
| LOC104878791              | 0.393812 | 2.18969   | 1.8974    |
| LOC100265900              | 3.20824  | 0.161691  | 2.84034   |
| LOC100255589              | 3.84527  | 20.6294   | 81.3315   |
| LOC100250402              | 0.568693 | 0.48798   | 4.11143   |
| LOC100250434              | 5.57783  | 0.087082  | 0.198494  |
| LOC100253696              | 2.33897  | 0.468822  | 2.34844   |
| LOC100252205              | 0        | 2.16483   | 0.434708  |
| LOC100264205              | 2.3704   | 11.4713   | 7.49236   |
| LOC100264093              | 0.507584 | 1.10807   | 4.31531   |
| LOC100248682              | 0.740362 | 0.865099  | 3.06411   |
| GT3                       | 11.065   | 1.35752   | 0.765345  |
| LOC100251483              | 0.399365 | 0.378771  | 4.46218   |
| LOC100241214              | 2.91459  | 0.209893  | 0.0912697 |
| LOC100245631              | 39.5181  | 11.3815   | 3.06982   |
| LOC100855361              | 17.5771  | 9.74949   | 49.1269   |
| LOC100255590              | 14.2736  | 0.339288  | 0.14754   |
| LOC104878897              | 250.811  | 0         | 0         |
| LOC100253700              | 3.51846  | 0.807916  | 0.273399  |
| LOC100245203              | 0.177464 | 1.92624   | 2.24679   |
| LOC100253706              | 5.13409  | 36.5046   | 42.498    |
| LOC100246869              | 10.5791  | 46.3963   | 51.5614   |
| LOC104878920              | 58.1074  | 16.5692   | 0.319641  |
| LOC104878948              | 0.117049 | 1.74996   | 1.90792   |
| LOC100263311              | 9.00928  | 18.0783   | 47.7121   |
| LOC100244413              | 65.2     | 8.76831   | 671.525   |
| LOC100259788              | 151.817  | 381.136   | 38.5813   |
| LOC100242699              | 0.667376 | 86.1177   | 6.85175   |
| LOC100257121              | 21.896   | 3.23346   | 6.33517   |
| LOC104878931              | 7.45036  | 1.72587   | 0.341474  |
| LOC100251889              | 7.76635  | 26.0013   | 5.94838   |
| LOC100262128              | 17.2796  | 13.7338   | 0.594702  |
| LOC100233114              | 95.5557  | 0.377342  | 1.81332   |
| LOC100243271              | 8.64659  | 23.4541   | 5.73976   |
| LOC100260651              | 2.03608  | 0.794256  | 5.07142   |
| LOC100265746              | 27.3252  | 17.8137   | 4.54081   |

|                           |           |           |           |
|---------------------------|-----------|-----------|-----------|
| LOC100257133              | 76.7922   | 53.2511   | 13.9081   |
| LOC100241748              | 2.62651   | 0         | 2.91196   |
| LOC100264191              | 4.18575   | 0         | 0.797278  |
| LOC100248778              | 13.6706   | 0         | 2.16016   |
| LOC100265736              | 2.49168   | 0         | 0.336448  |
| LOC100260633,LOC104878769 | 2.93542   | 6.5274    | 15.8724   |
| LOC100260696              | 35.9607   | 10.7853   | 2.61977   |
| LOC100262390              | 0.0524    | 0.243416  | 1.70535   |
| LOC100241839              | 1.33115   | 7.32342   | 5.27559   |
| LOC100245123              | 10.9384   | 0.836037  | 1.29178   |
| LOC100243457              | 0.740942  | 4.86871   | 5.38603   |
| LOC100243495              | 1.58785   | 3.99571   | 0.579981  |
| LOC100248701              | 1.69338   | 5.8035    | 1.24022   |
| IFRL6                     | 12.7183   | 156.931   | 189.453   |
| LOC100853060              | 0.441862  | 0         | 21.2134   |
| LOC100853024              | 0         | 0         | 12.6927   |
| LOC100852930              | 0.5906    | 0.142686  | 824.849   |
| LOC104878807              | 0.4945    | 0         | 9.97109   |
| LOC100265877              | 8.38752   | 0.847751  | 15.7921   |
| LOC100260701              | 0.0817851 | 0.119234  | 7.27269   |
| LOC100264100              | 28.2635   | 37.1999   | 143.943   |
| LOC100245165              | 3.0396    | 23.3244   | 15.6467   |
| LOC100257333              | 0.272783  | 0.0809809 | 1.18341   |
| LOC100241832              | 0.696581  | 1.06981   | 7.63115   |
| LOC100245274              | 273.119   | 60.0965   | 58.8692   |
| LOC100259535              | 0.485228  | 13.3222   | 0.967053  |
| LOC100252521              | 0.365385  | 2.6785    | 39.2652   |
| LOC100242957              | 0.290773  | 2.96917   | 0         |
| LOC100265159              | 97.4318   | 30.666    | 15.3798   |
| LOC100263403              | 0.106283  | 1.14128   | 0.580783  |
| LOC104878821              | 0         | 0.374525  | 4.10079   |
| LOC100259955              | 0.350312  | 2.59062   | 5.04453   |
| LOC100253211              | 0.892596  | 0.105438  | 20.6151   |
| LOC100855413              | 1.73679   | 0         | 0.0378773 |
| LOC100265220              | 13.5252   | 0.683769  | 0.921191  |
| LOC100258330              | 67.7018   | 25.0761   | 15.9958   |
| LOC100241199              | 6.42627   | 2.52547   | 14.2359   |
| LOC100265141              | 1.63766   | 0         | 6.33076   |
| LOC100242852              | 0.230742  | 41.8346   | 1.70545   |
| LOC100247990              | 1.48771   | 57.1781   | 10.4149   |
| LOC100253281              | 0         | 3.33102   | 0.377944  |
| PR-1,PR1                  | 5.98161   | 0.705437  | 669.843   |
| LOC104878838              | 0.670288  | 0         | 1.79479   |
| LOC100267951              | 0.623964  | 5.61725   | 9.33264   |
| LOC100254955              | 0.0943964 | 3.0744    | 1.56046   |
| LOC104878895              | 25.5904   | 0         | 3.73175   |
| LOC104878914              | 0.291973  | 2.02643   | 0         |

|                           |           |           |          |
|---------------------------|-----------|-----------|----------|
| LOC104878918              | 0         | 0.360616  | 1.51697  |
| LOC100245219              | 54.9599   | 9.46661   | 40.1176  |
| LOC104878949              | 0         | 0         | 2.41801  |
| LOC100255633              | 0.043354  | 0.447475  | 2.33295  |
| LOC100248624              | 0.145764  | 1.50319   | 0.248678 |
| LOC100254677              | 141.748   | 12.0472   | 4.19502  |
| LOC100266732              | 8.02537   | 1.63711   | 4.07819  |
| LOC100249571              | 2.9296    | 0.293474  | 2.78156  |
| LOC100254685              | 6.49637   | 5.14934   | 21.6511  |
| LOC100246147              | 2.39387   | 0.315815  | 1.87682  |
| LOC100264985              | 31.4224   | 2.60512   | 66.3092  |
| LOC100255284              | 276.888   | 1311.75   | 711.928  |
| LOC100262239              | 0.358907  | 4.10993   | 2.04681  |
| LOC100257733              | 0.975645  | 9.61713   | 1.68136  |
| LOC104878975              | 1.1017    | 42.3199   | 13.1168  |
| LOC100245594              | 12.706    | 7.82579   | 59.081   |
| LOC100252510              | 11.3888   | 2.24345   | 3.323    |
| LOC100242268              | 2.54572   | 0.376172  | 1.64964  |
| LOC100257789              | 1.81501   | 2.32812   | 9.01261  |
| LOC100247474              | 1.21503   | 0.327669  | 2.409    |
| LOC100245801              | 0.94379   | 1.01626   | 4.73923  |
| LOC100257849              | 6.27986   | 6.71627   | 33.533   |
| LOC100259283              | 0.222965  | 0.0513704 | 3.48096  |
| LOC100259270              | 0.652885  | 0.310836  | 1.56896  |
| LOC100257828              | 0         | 3.06516   | 11.0775  |
| LOC100254240              | 2.77577   | 4.83311   | 1.07207  |
| LOC100242450              | 0.108238  | 2.11215   | 2.6284   |
| LOC100259497              | 14.86     | 3.6232    | 12.8824  |
| RD22-C                    | 0.495747  | 1.03683   | 246.169  |
| LOC100259409              | 0         | 6.48216   | 5.31649  |
| LOC104879004,LOC104879005 | 49.9542   | 2.77846   | 10.1391  |
| LOC100852625,LOC104879049 | 12.5414   | 0         | 69.6309  |
| LOC100254233              | 255.915   | 3.79277   | 1174.97  |
| LOC100252668              | 63.7821   | 0.187092  | 0.131886 |
| LOC100249127              | 8.49033   | 0         | 1.46125  |
| LOC100243964              | 6.96337   | 1.67413   | 2.02549  |
| LOC100259547              | 2.68909   | 2.76921   | 0.652467 |
| LOC100267929,LOC104879013 | 1.46249   | 9.86756   | 4.15822  |
| LOC100245608              | 1.67307   | 21.0063   | 0.126002 |
| LOC100267884              | 0.937156  | 7.926     | 2.42221  |
| LOC100252479              | 910.991   | 224.959   | 2300.38  |
| LOC100259338              | 8.775     | 4.79615   | 22.2522  |
| LOC100262752              | 1.26082   | 3.85044   | 8.92886  |
| LOC100253755              | 0.0468599 | 1.74761   | 1.23464  |
| LOC100241108              | 0         | 2.03124   | 0.021445 |
| LOC100248656              | 0         | 1.42459   | 0        |
| LOC100252152              | 1.65758   | 0.0149745 | 0        |

|                           |           |           |           |
|---------------------------|-----------|-----------|-----------|
| LOC100249685              | 5.94801   | 3.56907   | 17.9944   |
| LOC100244374              | 7.25429   | 18.9628   | 4.07877   |
| LOC100247879              | 15.7135   | 1.16403   | 16.0529   |
| LOC100249605              | 0.661737  | 2.68714   | 9.8889    |
| LOC104879142              | 0.586258  | 9.48669   | 1.22357   |
| LOC100240980              | 1.27171   | 1.51165   | 0.363791  |
| LOC100252985              | 1.21742   | 8.23479   | 4.00769   |
| LOC100265092              | 54.1098   | 0.330592  | 0.0214014 |
| LOC100252977              | 0.668075  | 4.39486   | 0.955433  |
| LOC100241065              | 21.5843   | 1.96721   | 37.5934   |
| LOC100240994              | 3.71118   | 2.15805   | 12.0301   |
| LOC100247207,LOC104877277 | 3.93418   | 0.820902  | 20.1614   |
| LOC100232848              | 4.55052   | 4.13781   | 27.3373   |
| LOC100267863              | 3.67062   | 8.50379   | 1.24605   |
| LOC100854147              | 0.195541  | 0.911287  | 1.18925   |
| LOC100247095              | 0.0442568 | 0.33972   | 2.2513    |
| F3H                       | 276.848   | 117.34    | 7.47729   |
| LOC104879153              | 0         | 2.40103   | 0.55885   |
| LOC104879125              | 1.57331   | 2.49436   | 0.6177    |
| LOC100247204              | 27.2047   | 165.721   | 52.5924   |
| LOC100247111              | 9.34389   | 38.5391   | 26.8326   |
| LOC100250555              | 2.02286   | 4.91133   | 1.06744   |
| LOC100259071              | 1.06126   | 4.27807   | 10.0741   |
| LOC100249006,LOC100254111 | 72.8167   | 5.0425    | 98.4765   |
| LOC100853656              | 0         | 0         | 1.00898   |
| LOC100257602              | 0.178468  | 1.5603    | 0.310856  |
| LOC100853165              | 2049.24   | 600.83    | 2889.23   |
| LOC100259244              | 2.70956   | 0.0997683 | 0.256126  |
| LOC100262539              | 2.10036   | 8.16515   | 12.3468   |
| LOC100264434              | 2.35511   | 4.20049   | 0.652972  |
| LOC100250623              | 1.98593   | 2.33043   | 0.371692  |
| LOC100232935              | 91.0447   | 44.6971   | 213.879   |
| LOC100243051              | 12.5573   | 1.65207   | 11.898    |
| LOC100251677              | 1.46254   | 0.0187688 | 0.106729  |
| LOC100247400              | 0         | 0.623558  | 3.06587   |
| LOC100266322              | 16.835    | 1.50776   | 6.9547    |
| LOC100243924              | 0.0514192 | 0.198799  | 6.25447   |
| LOC100245740              | 17.5706   | 3.64822   | 23.3797   |
| LOC100262911              | 0.239533  | 5.6238    | 0.0897336 |
| LOC100254397              | 2.29475   | 10.3939   | 4.89677   |
| LOC100266315              | 2.62234   | 2.80609   | 22.4764   |
| LOC100249153              | 11.8379   | 1.64462   | 7.40739   |
| LOC100266471              | 179.97    | 11.5609   | 21.6673   |
| LOC100257698              | 2.41465   | 0.432364  | 4.67764   |
| LOC100266225              | 7.99813   | 4.28563   | 18.4617   |
| LOC100266369              | 4.67041   | 2.07691   | 0.845097  |
| LOC100264680              | 4.31375   | 13.5291   | 24.0686   |

|                           |           |           |           |
|---------------------------|-----------|-----------|-----------|
| LOC100252547              | 158.818   | 29.9356   | 98.4899   |
| LOC100252631              | 6.4572    | 0.0933974 | 0         |
| LOC100852666              | 5.23138   | 0         | 34.2054   |
| LOC104879007              | 0.812487  | 0.257411  | 5.24755   |
| LOC100255917              | 0.0983782 | 0.208409  | 1.58208   |
| LOC100259490              | 8.01085   | 0.505064  | 10.725    |
| LOC104879016              | 0.708807  | 3.14266   | 2.96866   |
| LOC100262779              | 3.89469   | 10.9598   | 15.7551   |
| LOC100255990              | 37.2647   | 10.2307   | 8.55061   |
| LOC100257754              | 0.324994  | 24.0107   | 0.0549032 |
| LOC100242272              | 0.861297  | 1.21103   | 3.7949    |
| LOC100262729              | 0         | 0.562867  | 3.71903   |
| LOC100266177              | 0         | 1.14535   | 0.140137  |
| LOC100259329              | 48.1073   | 77.2713   | 5.94288   |
| LOC100266281              | 5.7563    | 1.22437   | 4.80728   |
| LOC100262872              | 0.481051  | 2.40367   | 1.65064   |
| LOC100254251              | 3.60054   | 0.652802  | 1.08195   |
| LOC104879058              | 0.503036  | 6.47758   | 1.5485    |
| LOC104879077              | 0.114776  | 2.73057   | 0         |
| LOC104879079              | 0.386628  | 1.18924   | 0.293407  |
| LOC100243515              | 0.571566  | 1.88192   | 2.57647   |
| LOC104879098              | 0         | 1.96963   | 0         |
| LOC100854905              | 0.296571  | 0.204943  | 1.34388   |
| GST4                      | 2246.15   | 1278.89   | 9.85937   |
| LOC100244416              | 0.763859  | 1.43904   | 0.238045  |
| LOC100253049              | 0.467745  | 0.0150621 | 1.95804   |
| LOC100256454              | 3.44772   | 0.472951  | 3.89511   |
| LOC100264992              | 11.3936   | 7.79176   | 1.30046   |
| LOC100252964,LOC100256532 | 43.2173   | 25.2267   | 6.31759   |
| LOC100261630              | 1.39279   | 0.614637  | 10.2372   |
| LOC100247855              | 3.06654   | 3.94017   | 0.915216  |
| LOC100263254              | 10.52     | 23.308    | 3.25302   |
| LOC100240984              | 0.701497  | 4.88195   | 10.2242   |
| LOC100251398              | 72.8592   | 15.2365   | 36.6075   |
| LOC100266832              | 2.02601   | 0         | 0         |
| LOC100251313              | 2.92475   | 5.07073   | 1.25842   |
| LOC100266757              | 4.73634   | 0.593567  | 0.0528827 |
| LOC100253073              | 436.172   | 6.56224   | 3.13632   |
| LOC100258209              | 37.5682   | 5.32026   | 9.36291   |
| LOC100852802              | 5.78254   | 8.37018   | 32.6595   |
| LOC100262585              | 5.38468   | 25.1585   | 8.09697   |
| LOC100253840              | 86.539    | 22.5144   | 20.1308   |
| LOC100245522              | 0.324168  | 0.864952  | 1.97671   |
| LOC104879194              | 1.0244    | 0.329331  | 0.209345  |
| LOC100266089              | 98.8674   | 40.0248   | 11.3746   |
| LOC100248918              | 2.06582   | 3.21862   | 0.174033  |
| LOC100267170              | 0.15706   | 1.31163   | 0.217613  |

|                           |          |           |          |
|---------------------------|----------|-----------|----------|
| LOC100260142              | 24.0105  | 4.3245    | 22.9739  |
| LOC100246634              | 0        | 1.45231   | 0.462799 |
| LOC100256778              | 1.34009  | 0.764604  | 0.3333   |
| LOC104879215              | 0.293808 | 5.02545   | 0.851523 |
| LOC100256894              | 0.285355 | 1.73373   | 1.0486   |
| LOC100241496              | 2.56043  | 1.84529   | 7.67232  |
| LOC100261887              | 63.4075  | 178.341   | 2.31759  |
| LOC100256795              | 18.0909  | 44.0897   | 0.38657  |
| LOC100251668              | 29.2386  | 27.1516   | 1.48601  |
| LOC100260215              | 6.72796  | 1.72876   | 0.274216 |
| LOC104879202              | 3.50671  | 7.73964   | 14.1043  |
| LOC100249877              | 2.33568  | 7.98804   | 15.8142  |
| LOC100242064              | 0.108172 | 0.265025  | 2.1801   |
| LOC100263041              | 0.363167 | 5.58613   | 3.34893  |
| LOC100256165              | 5.72817  | 0.892409  | 9.54217  |
| LOC100251007              | 1.00982  | 1.35996   | 11.9352  |
| LOC100259559              | 0.349329 | 2.90445   | 3.3556   |
| LOC100259548              | 0.569411 | 4.99092   | 2.95615  |
| LOC100254429              | 1.0722   | 4.98613   | 4.34915  |
| LOC100261302              | 7.16462  | 5.76618   | 27.2978  |
| LOC100251097              | 1.00148  | 3.13094   | 10.3171  |
| LOC100244323              | 11.6533  | 11.7825   | 1.61248  |
| LOC100263116              | 15.0832  | 33.2029   | 3.86674  |
| LOC100259752              | 26.9666  | 293.935   | 17.3405  |
| LOC100251040              | 4.16606  | 17.0272   | 19.4104  |
| LOC100252901              | 5.63198  | 8.02265   | 1.92013  |
| LOC100259676              | 41.2339  | 8.66195   | 5.23769  |
| LOC100266490              | 16.9348  | 12.6738   | 2.56016  |
| LOC100264824              | 2.07992  | 0.358522  | 0.263194 |
| LOC100266596              | 6.07302  | 29.3905   | 13.9065  |
| LOC100251140              | 1.18888  | 0.0749918 | 0        |
| LOC100261423              | 3.22771  | 8.23405   | 1.00171  |
| LOC100245922              | 4.03389  | 15.0953   | 2.74504  |
| LOC100256292,LOC100261388 | 89.5611  | 17.7922   | 28.0687  |
| LOC100251134              | 45.7616  | 11.944    | 68.5455  |
| LOC100247693              | 0.886543 | 1.12981   | 11.6297  |
| LOC100249518              | 0.296537 | 4.13623   | 5.96104  |
| LOC100266478              | 0.591134 | 19.4215   | 2.10349  |
| LOC104879295              | 0        | 1.02312   | 0.165844 |
| LOC100266585              | 12.6443  | 6.47265   | 31.7198  |
| LOC100256286              | 0.417504 | 3.16084   | 3.08301  |
| LOC100240897              | 1.12897  | 0.573191  | 5.76428  |
| CHS3                      | 2095.84  | 442.503   | 49.6964  |
| LOC100265737              | 9.18533  | 19.2567   | 41.1458  |
| LOC100252165              | 3.77245  | 0.110943  | 27.2997  |
| LOC104877384              | 2.21784  | 0         | 0.363699 |
| LOC104877391              | 5.63413  | 0         | 1.33851  |

|                           |           |          |          |
|---------------------------|-----------|----------|----------|
| LOC104879362              | 1.8925    | 0.309857 | 1.12113  |
| LOC100248619              | 1.03517   | 0.551332 | 0.192105 |
| LOC100250461              | 0.339756  | 2.06182  | 10.3889  |
| LOC100255642              | 0.713142  | 7.7032   | 58.6624  |
| LOC100260716              | 0.137387  | 1.23048  | 1.51971  |
| LOC100259981              | 0.923313  | 2.54849  | 0.547848 |
| LOC100244608              | 34.9357   | 21.1819  | 4.29768  |
| LOC100854828              | 0.557594  | 0.506019 | 2.48944  |
| LOC104879453              | 1.45918   | 6.3671   | 3.34201  |
| LOC104879488              | 0         | 2.10091  | 0.142021 |
| LOC100243918              | 5.42359   | 4.23614  | 0.634169 |
| LOC100264616              | 23.005    | 13.7418  | 5.18277  |
| LOC100266359              | 0         | 1.32924  | 0        |
| LOC100253295              | 19.2703   | 48.8064  | 89.58    |
| LOC100255033              | 0.542471  | 1.91707  | 7.97195  |
| LOC100246529              | 185.159   | 0.239126 | 2.15229  |
| LOC100241405              | 1.45446   | 0        | 0.098183 |
| LOC100256873,LOC104879213 | 0         | 4.32439  | 5.02778  |
| PR10.8                    | 1.38281   | 4.08867  | 0.742269 |
| PR10.9                    | 1.90708   | 18.006   | 3.52052  |
| PR10.7                    | 58.1407   | 3.92031  | 52.7585  |
| LOC100244758              | 7.03246   | 21.3399  | 0.327922 |
| PR10.3                    | 257.262   | 423.66   | 42.3839  |
| LOC100255126              | 8.74984   | 3.14393  | 12.943   |
| LOC100265331              | 4.70438   | 0.731571 | 3.44478  |
| LOC100253439              | 0.134877  | 0.384731 | 2.66645  |
| LOC100248153              | 1.31608   | 2.50908  | 0.296835 |
| LOC100241949              | 46.5773   | 10.9611  | 8.74782  |
| LOC100243191              | 0.460996  | 2.43047  | 4.6472   |
| LOC100854284              | 0         | 3.92049  | 11.6027  |
| LOC100853716              | 0.0438027 | 17.1     | 28.0978  |
| LOC100252933              | 15.8908   | 8.11038  | 46.1622  |
| LOC100252810              | 0.117163  | 0.472293 | 2.60721  |
| LOC100251002              | 0.201629  | 1.03086  | 2.28203  |
| LOC100264795              | 0.218004  | 1.26739  | 1.25198  |
| LOC100247810              | 0.139651  | 0.292952 | 2.72188  |
| LOC100249323              | 277.609   | 68.6898  | 116.036  |
| HT5                       | 4.00436   | 28.0068  | 1.03109  |
| LOC100240867              | 0.112965  | 3.65788  | 0.22965  |
| LOC104879274              | 0         | 9.38973  | 1.22759  |
| LOC100254587,LOC100263125 | 7.34338   | 15.6057  | 3.44757  |
| LOC100266656              | 0.427133  | 6.30653  | 0.151153 |
| LOC100251211,LOC100256366 | 6.65248   | 2.98729  | 15.7657  |
| LOC100247679              | 1.91882   | 3.78648  | 7.67695  |
| LOC100259653              | 2.38321   | 21.0228  | 3.48256  |
| LOC100245945              | 0.0707284 | 1.36998  | 34.6025  |
| LOC100244856              | 17.3043   | 4.37161  | 28.4843  |

|              |           |           |           |
|--------------|-----------|-----------|-----------|
| LOC100254645 | 0.0111201 | 0.104168  | 13.1176   |
| LOC100242476 | 1.15484   | 0.685036  | 0.153163  |
| LOC100259585 | 0.420333  | 1.68822   | 1.43783   |
| LOC100264868 | 4.80092   | 10.3646   | 0.259252  |
| LOC100245900 | 165.535   | 44.4019   | 419.995   |
| LOC100263066 | 28.4597   | 44.9224   | 115.371   |
| LOC100264865 | 2.35146   | 1.78912   | 9.28109   |
| LOC100258034 | 60.7337   | 5.78067   | 27.6244   |
| LOC100242465 | 0.781391  | 3.43816   | 1.78469   |
| GRIP4,MRIP1  | 578.359   | 3537.34   | 1333.63   |
| LOC100240909 | 18.2826   | 114.307   | 1163.07   |
| LOC100264738 | 80.5041   | 6.0746    | 25.8953   |
| LOC100244140 | 0.314221  | 2.59075   | 2.51836   |
| LOC100259740 | 10.5655   | 0.896902  | 5.08322   |
| LOC100249526 | 5.84819   | 0.69529   | 1.35174   |
| LOC100258020 | 1.44891   | 15.2303   | 2.42479   |
| LOC100245916 | 1.81778   | 12.1504   | 1.75244   |
| LOC100240788 | 0.873196  | 2.91047   | 0.463647  |
| LOC100242670 | 0.327352  | 0.964592  | 1.97371   |
| LOC100261301 | 0.369045  | 2.9317    | 1.55992   |
| LOC100852746 | 0.228476  | 2.96472   | 1.39088   |
| LOC104879322 | 1.63367   | 1.23114   | 0.39015   |
| LOC104877450 | 0.40597   | 2.22998   | 0.863423  |
| LOC100266687 | 0         | 1.54098   | 0.201855  |
| LOC100255447 | 0.688797  | 6.4285    | 9.58632   |
| LOC100257288 | 59.007    | 35.677    | 12.9063   |
| LOC100245254 | 0.610549  | 3.67857   | 0.611128  |
| LOC104879368 | 1.27982   | 0         | 0.277997  |
| LOC104879366 | 0.1155    | 0.59297   | 2.97993   |
| LOC100262385 | 0.404609  | 6.79056   | 1.62005   |
| LOC104879357 | 1.19388   | 0         | 0.0986444 |
| LOC104879356 | 0.206455  | 0         | 2.10678   |
| LOC104879355 | 3.02558   | 0.0147964 | 0.276922  |
| LOC100263523 | 0.932016  | 9.41474   | 85.2637   |
| LOC100266931 | 5.70474   | 8.80292   | 24.1036   |
| LOC100246287 | 40.6692   | 75.4191   | 11.6384   |
| LOC100854122 | 9.77968   | 2.2576    | 2.98122   |
| LOC100246361 | 1.29616   | 7.0824    | 7.89776   |
| LOC104879424 | 0.9266    | 10.4247   | 8.60297   |
| LOC100262094 | 0         | 3.66696   | 1.52906   |
| LOC104879465 | 5.53704   | 3.28196   | 0.445691  |
| LOC104879470 | 0.136988  | 2.78122   | 0.295173  |
| LOC100266390 | 6.57576   | 45.7258   | 44.8104   |
| LOC100256098 | 4.5435    | 7.95154   | 1.61492   |
| LOC100244031 | 0.526249  | 3.92936   | 0.0453541 |
| LOC104879495 | 3.25801   | 5.44503   | 27.0486   |
| LOC100244046 | 4.18941   | 0.91243   | 1.7686    |



|                           |          |          |          |
|---------------------------|----------|----------|----------|
| LOC100259258              | 0.261501 | 1.56654  | 0.626944 |
| LOC100262970              | 1.85787  | 2.56908  | 9.60116  |
| MLO15                     | 8.89625  | 83.0446  | 33.3403  |
| LOC104879640              | 0.807129 | 2.26088  | 0        |
| LOC100258679              | 2.81962  | 0.563535 | 1.15248  |
| LOC100854198              | 0.486906 | 2.02403  | 0.22028  |
| LOC100260405              | 97.8976  | 15.1138  | 174.321  |
| LOC100265620              | 90.9752  | 48.8894  | 256.286  |
| LOC100244918              | 6.05651  | 33.3433  | 9.13316  |
| LOC100253541              | 52.2369  | 6.66955  | 1.28295  |
| LOC100263839              | 12.286   | 16.1864  | 1.60964  |
| LOC100241568              | 9.45783  | 23.8002  | 1.3656   |
| LOC100246695              | 1.68305  | 3.52417  | 0.35723  |
| LOC100251830              | 1.51936  | 3.19712  | 11.3185  |
| LOC100258789              | 99.5816  | 0        | 0.528514 |
| LOC100248545,LOC104879589 | 1.43851  | 0.157459 | 0.170179 |
| LOC100241684              | 0.318234 | 0.14349  | 11.7502  |
| LOC100255333              | 3.46056  | 7.86947  | 1.85771  |
| LOC100241571              | 0.282459 | 1.65807  | 4.44189  |
| LOC100246807              | 1.16352  | 6.56049  | 6.30965  |
| LOC100263963              | 33.0063  | 14.6795  | 6.33582  |
| LOC104879579              | 6.97498  | 1.39608  | 4.96655  |
| LOC100853565              | 2.47315  | 0.606001 | 3.27125  |
| LOC100257080              | 0        | 0        | 2.00904  |
| GRIP22                    | 11935.6  | 1944.31  | 9404.42  |
| LOC100245047              | 7.58404  | 0.744188 | 7.49972  |
| LOC100853239              | 0.914457 | 1.24323  | 5.52997  |
| LOC100256973              | 202.901  | 39.7929  | 50.6584  |
| LOC104879568              | 0.241645 | 0.600857 | 5.07643  |
| PIP2                      | 0.368251 | 3.32674  | 8.68413  |
| LOC100251941              | 2.00075  | 3.73019  | 14.2896  |
| LOC100253566              | 1.34529  | 0.298658 | 0.538662 |
| LOC100233064              | 1.1281   | 3.98007  | 0.750478 |
| LOC100243320              | 4.23254  | 6.35697  | 31.2522  |
| LOC100255365              | 0.072623 | 1.59235  | 0.504481 |
| LOC100255372              | 0        | 0.1879   | 1.17307  |
| LOC100265533              | 85.9618  | 295.685  | 35.8768  |
| LOC100246640              | 0.90719  | 11.5035  | 9.38681  |
| LOC100250212              | 3.05281  | 2.34789  | 14.6965  |
| LOC104879547              | 2.0933   | 1.40751  | 0        |
| LOC100262098              | 2.96801  | 0        | 0.919358 |
| LOC104879615              | 0.866303 | 12.376   | 0.76711  |
| LOC100248386              | 179.955  | 11.1731  | 87.5618  |
| LOC100241712              | 1.40696  | 12.3601  | 1.07706  |
| LOC100243236              | 0.65973  | 0.382233 | 5.76486  |
| LOC100248366              | 0.80576  | 13.671   | 1.00098  |
| LOC100262025              | 0        | 0.24107  | 3.51275  |

|                           |           |           |           |
|---------------------------|-----------|-----------|-----------|
| LOC100265697              | 2.69557   | 11.7352   | 29.741    |
| LOC100262131              | 0.627628  | 2.02556   | 3.53637   |
| LOC100267299              | 2.68045   | 19.7247   | 5.4883    |
| LOC100251984,LOC100262142 | 1.64994   | 8.11248   | 0.831945  |
| LOC100260379              | 0         | 2.0042    | 0.166725  |
| LOC100262223              | 0.722519  | 0.412299  | 3.78432   |
| LOC100263887              | 1.65104   | 0.292856  | 14.512    |
| LOC100257005              | 79.8818   | 378.614   | 88.1669   |
| LOC100261566              | 0.821361  | 30.5556   | 7.49668   |
| LOC100853401,LOC104877424 | 0.16773   | 1.4895    | 0.776677  |
| LOC100261580              | 64.6201   | 16.9219   | 96.647    |
| LOC100253027              | 134.992   | 332.83    | 75.8583   |
| LOC100251280              | 12.5352   | 57.0751   | 77.9214   |
| LOC100854978              | 2.81808   | 0.218305  | 0         |
| LOC100249557              | 0.165192  | 1.29563   | 6.1379    |
| LOC100258223              | 0.0939168 | 1.39751   | 0.151477  |
| LOC100249635              | 0         | 0.393314  | 1.89087   |
| LOC100247908              | 3.06004   | 0.668889  | 1.62818   |
| LOC100244402              | 5.30714   | 7.83646   | 25.9092   |
| LOC100259777              | 7.21187   | 9.1702    | 1.75769   |
| F3'5'H                    | 37.4275   | 0.152358  | 0.0341022 |
| LOC100248071              | 1.33155   | 0.0220808 | 0         |
| LOC100267840              | 3.18008   | 0         | 0.0200294 |
| LOC100243414              | 1.51556   | 0.0735221 | 0         |
| LOC100852531              | 1.01794   | 0         | 0         |
| LOC100241335              | 35.1661   | 2.74008   | 0         |
| LOC100263664              | 127.235   | 34.8341   | 11.8097   |
| LOC100246526              | 5.30741   | 0.357516  | 0.298357  |
| LOC104879646              | 0.756879  | 6.23648   | 0.202601  |
| LOC100265368              | 0.65838   | 14.0603   | 0.62963   |
| LOC100244768              | 110.508   | 61.0108   | 26.9412   |
| LOC104879714              | 84.5754   | 18.1966   | 21.2646   |
| LOC100267088              | 4.1973    | 0         | 0         |
| LOC100244770              | 0.658624  | 5.26741   | 5.40586   |
| LOC100249900              | 0.0708437 | 0.158242  | 2.86594   |
| LOC100243057              | 0.27328   | 0.514622  | 1.22937   |
| LOC100246559              | 4.46439   | 2.59909   | 0.717126  |
| LOC100243061              | 0.284737  | 1.39472   | 0.397917  |
| LOC100251616              | 14.9718   | 5.99122   | 78.6892   |
| LOC104879704              | 0         | 0         | 2.26032   |
| LOC100244875              | 2.45794   | 11.1888   | 4.43618   |
| LOC100266673              | 14.0674   | 2.61592   | 1.5663    |
| LOC100253478              | 3.70038   | 0.674954  | 0.109582  |
| LOC100257100              | 0.651674  | 2.53317   | 5.00147   |
| LOC104879739              | 0.302383  | 1.54369   | 0.204069  |
| LOC100263939              | 1.00967   | 16.2589   | 1.46485   |
| LOC104879597              | 0         | 0.365777  | 2.6324    |

|              |           |           |           |
|--------------|-----------|-----------|-----------|
| LOC100263949 | 19.8721   | 41.7      | 8.53527   |
| LOC100263837 | 22.1698   | 11.4233   | 3.32166   |
| LOC100262067 | 0.0707763 | 0         | 2.80235   |
| LOC100255325 | 50.8348   | 10.8689   | 57.6694   |
| LOC100260291 | 1.41978   | 16.7966   | 6.48156   |
| LOC100244923 | 15.2612   | 37.692    | 121.581   |
| LOC104879585 | 0.764118  | 0         | 1.78305   |
| LOC100854491 | 3.23127   | 33.6331   | 6.94713   |
| LOC104879583 | 0         | 1.00004   | 0         |
| LOC100253650 | 1.54647   | 3.40771   | 10.9112   |
| LOC100241575 | 167.921   | 65.13     | 20.7638   |
| LOC100245036 | 2.79313   | 6.09949   | 17.5243   |
| LOC100251969 | 10.4127   | 3.77938   | 24.3541   |
| LOC100243211 | 0.243905  | 0.365307  | 1.52195   |
| LOC100241584 | 0.121421  | 4.70588   | 0.929393  |
| LOC100246844 | 1.2609    | 0         | 0.441282  |
| LOC100255240 | 22.2851   | 5.11515   | 19.6111   |
| LOC100253492 | 0.260989  | 1.97623   | 7.71399   |
| LOC100255246 | 41.7761   | 21.868    | 108.945   |
| LOC100258611 | 0.776781  | 3.46575   | 0.815711  |
| LOC100245055 | 35.2125   | 20.3598   | 113.45    |
| LOC100255358 | 15.9562   | 61.0253   | 4.61676   |
| LOC104879541 | 15.9026   | 32.7239   | 5.96367   |
| CTR6         | 0         | 2.77223   | 0.673235  |
| CTR7         | 4.91708   | 45.1051   | 0.368417  |
| LOC100251865 | 21.9691   | 92.3154   | 97.3939   |
| LOC100853495 | 2.92832   | 1.85982   | 0         |
| LOC100251798 | 0.189273  | 1.13491   | 0.0479185 |
| LOC100243349 | 18.9719   | 0.0554222 | 0.600439  |
| LOC100265561 | 6.0094    | 0.408393  | 10.9232   |
| LOC100250239 | 0.0196783 | 0.126634  | 2.09476   |
| LOC100257036 | 6.21688   | 34.1303   | 0.0745553 |
| LOC100262112 | 20.0513   | 28.8083   | 6.7239    |
| LOC100255269 | 10.0768   | 43.3193   | 14.159    |
| LOC100263822 | 4.4964    | 0.913896  | 28.7933   |
| LOC100253493 | 345.275   | 236.134   | 53.8198   |
| LOC100249672 | 0.0471271 | 0.642501  | 4.67712   |
| LOC100246224 | 12.576    | 17.3179   | 67.9975   |
| LOC104879665 | 0         | 0.0514842 | 1.52045   |
| LOC100253115 | 0.281198  | 1.56323   | 0.709624  |
| LOC104879651 | 0.197334  | 1.46065   | 0.503772  |
| LOC104879717 | 0.073838  | 1.06199   | 1.91835   |
| LOC100263698 | 46.5476   | 1.01109   | 134.222   |
| LOC100243077 | 1.86018   | 5.03561   | 12.4082   |
| LOC100261833 | 0.915039  | 0         | 1.58348   |
| LOC100854742 | 0.097564  | 0.538665  | 7.10693   |
| LOC100260258 | 0         | 0.217829  | 56.6931   |

|                           |           |           |           |
|---------------------------|-----------|-----------|-----------|
| LOC100248181              | 0         | 0.197503  | 1.57156   |
| LOC100243168              | 0.173738  | 3.13609   | 2.6462    |
| LOC100259719              | 0.494152  | 0.0538289 | 2.78177   |
| LOC100251004              | 10.6474   | 3.91806   | 17.3937   |
| LOC100265664              | 2.21646   | 0.309332  | 1.20588   |
| LOC104879730              | 2.33038   | 5.05418   | 15.7173   |
| LOC100854382              | 21.3292   | 22.3154   | 4.85602   |
| LOC100264878              | 1.89603   | 11.7789   | 4.72858   |
| LOC100852937              | 0.380479  | 0.414082  | 2.95512   |
| LOC104879755              | 1.24332   | 6.08229   | 0.890723  |
| LOC100247629              | 5.81326   | 2.44758   | 1.45259   |
| LOC100252738              | 11.4151   | 19.6514   | 86.6051   |
| LOC100853168              | 0.631248  | 3.65532   | 8.13786   |
| LOC104879772              | 2.78948   | 0.0317408 | 0.586739  |
| LOC100252825              | 5.15127   | 12.228    | 0.872758  |
| LOC100240843              | 2.18025   | 0.932774  | 0.37537   |
| LOC100266534              | 2.71044   | 7.75868   | 1.6149    |
| LOC104879761              | 0.312879  | 1.60949   | 0.0412343 |
| LOC100247639              | 3.96263   | 0         | 4.39124   |
| LOC100251998              | 20.5703   | 2.78496   | 33.5246   |
| LOC100253698              | 60.607    | 110.18    | 27.3698   |
| LOC100245304              | 12.2907   | 0.771849  | 108.465   |
| LOC100232904              | 6.3837    | 25.393    | 4.30067   |
| LOC104879790              | 4.90806   | 0.217911  | 0         |
| LOC100243565              | 12.2939   | 0.457896  | 0.395655  |
| LOC100252201              | 0.583115  | 3.3366    | 3.03584   |
| LOC100264200              | 0.226695  | 3.10808   | 3.31743   |
| LOC100260531              | 0.0571648 | 0.145035  | 1.15749   |
| LOC100255485              | 4.94638   | 0.345958  | 2.88511   |
| LOC100250305              | 3.52343   | 0.216905  | 1.2046    |
| LOC100257220              | 0         | 3.57345   | 0.0381757 |
| LOC100252196              | 0         | 0.108594  | 1.79421   |
| LOC100252166              | 1.39888   | 1.75985   | 7.23895   |
| MYB14                     | 12.499    | 4.70617   | 1.25057   |
| LOC100254904              | 2.83826   | 22.8546   | 18.4481   |
| LOC100260006,LOC100263455 | 1.12642   | 5.59119   | 3.23904   |
| LOC100241271              | 2.04062   | 10.5247   | 1.50384   |
| LOC100256669              | 2.82949   | 0.492664  | 3.80333   |
| LOC104879861              | 10.032    | 1.8237    | 1.70798   |
| LOC100252818              | 1.22124   | 15.5807   | 0.0852829 |
| LOC100254562              | 2.29865   | 13.3611   | 0.831139  |
| LOC100853965              | 2.53339   | 11.0731   | 13.5241   |
| LOC100266575              | 2.80734   | 0.0360424 | 0         |
| LOC104879888              | 2.83399   | 0.113668  | 0.427474  |
| LOC100265512              | 0.0702754 | 0.374256  | 25.0396   |
| LOC100253540              | 4.5015    | 0.979687  | 0.949806  |
| LOC100855319              | 0.458394  | 0.22465   | 5.24941   |

|                           |          |           |          |
|---------------------------|----------|-----------|----------|
| LOC104879902              | 2.09822  | 2.89547   | 0.49361  |
| LOC100249503              | 0.206926 | 1.23588   | 0.899905 |
| LOC100242628              | 137.297  | 14.1773   | 16.637   |
| LOC100854017              | 0        | 0.525872  | 1.47591  |
| LOC100855039              | 207.094  | 8.99169   | 1.32672  |
| LOC100854234              | 3.07643  | 4.29132   | 0.366305 |
| LOC100261250              | 2.50306  | 10.8105   | 13.8241  |
| LOC100262963              | 0.42572  | 0.593215  | 2.22991  |
| LOC100242388              | 17.8042  | 42.0446   | 130.94   |
| LOC100254308              | 2.23673  | 6.35026   | 11.9617  |
| LOC100261095              | 11.8464  | 11.0712   | 108.961  |
| LOC100247305              | 0.765656 | 0.449504  | 3.41408  |
| LOC100262973              | 1.01554  | 0         | 0        |
| LOC100250944              | 3.48886  | 0.680258  | 0.250323 |
| LOC100261177              | 0.266997 | 0.399452  | 2.17985  |
| LOC100249066              | 0.868299 | 2.53713   | 6.28626  |
| LOC100262983              | 0.14075  | 2.47512   | 2.97484  |
| LOC100252644              | 0.094134 | 6.75716   | 0.715872 |
| LOC100257784              | 1.76708  | 20.6772   | 6.20963  |
| LOC100259314              | 80.5057  | 20.6778   | 6.26448  |
| LOC104879927              | 0.842515 | 4.32045   | 5.42731  |
| LOC100242414              | 0.491489 | 0.918942  | 2.17695  |
| LOC100261123              | 62.912   | 254.913   | 106.677  |
| LOC100254266              | 0.503465 | 4.16138   | 4.35028  |
| LOC100259386              | 0        | 2.06883   | 4.95908  |
| LOC100250696              | 0.168955 | 2.15525   | 0.292936 |
| IFRL3                     | 0        | 0.321287  | 1.73828  |
| LOC100256321,LOC104879754 | 1.84469  | 0.900347  | 0.261795 |
| LOC104879750              | 0        | 6.34749   | 0.252913 |
| LOC100259592              | 8.11346  | 41.8136   | 21.3281  |
| LOC100264774              | 1.23838  | 15.5778   | 0.949056 |
| LOC100263120              | 117.587  | 103.721   | 18.1202  |
| LOC100854059              | 0        | 2.48462   | 0        |
| LOC100852645,LOC100853754 | 0.323877 | 0.379911  | 2.46646  |
| LOC100852532              | 0.741803 | 1.44039   | 3.89754  |
| LOC100853533              | 0.429441 | 0         | 2.09134  |
| LOC100264747              | 0.490346 | 27.7995   | 2.10134  |
| LOC100854564              | 9.75781  | 3.55794   | 19.8144  |
| LOC100264861              | 0.818448 | 5.31956   | 2.68031  |
| LOC100263109              | 20.8555  | 9.05514   | 49.3726  |
| LOC104879771              | 1.13206  | 5.58705   | 1.5305   |
| LOC100251223              | 2.34366  | 8.66436   | 0.153215 |
| LOC100247747              | 0        | 1.82383   | 10.2241  |
| LOC100266566              | 4.29052  | 0.0215093 | 0.220424 |
| LOC100253672              | 0        | 3.96264   | 0.451684 |
| LOC100248567              | 0.63355  | 2.81248   | 4.5857   |
| LOC100260563              | 69.194   | 37.1018   | 16.74    |

|                           |           |          |          |
|---------------------------|-----------|----------|----------|
| LOC100245167              | 10.984    | 1.36998  | 0.444611 |
| LOC100854991              | 0.424292  | 2.56599  | 1.84595  |
| LOC100264117              | 10.4627   | 0.321412 | 2.11052  |
| LOC100248587              | 1.06133   | 0.229203 | 7.33286  |
| LOC100243451              | 7.34677   | 4.47661  | 19.2323  |
| LOC100260647              | 7.89891   | 22.5031  | 1.25477  |
| LOC100252066              | 3.2842    | 1.86393  | 47.5038  |
| LOC100260673              | 1.01558   | 4.54811  | 2.07237  |
| LOC100260641              | 0         | 0        | 1.68873  |
| LOC100265739              | 0         | 2.25472  | 0.1665   |
| LOC100267452              | 3.25374   | 27.2108  | 7.6317   |
| LOC100263547              | 0         | 0.111261 | 1.02828  |
| LOC100246316              | 35.2507   | 2.99184  | 35.1182  |
| LOC100243021,LOC100248141 | 0.975953  | 4.50725  | 2.5608   |
| LOC100251082              | 0.575197  | 3.92947  | 2.02349  |
| LOC100241465,LOC100263724 | 0.0267144 | 0.198849 | 14.8287  |
| LOC100251642              | 0.454072  | 1.35749  | 2.42991  |
| LOC104879871              | 0.47256   | 0.254513 | 3.05026  |
| LOC100261941              | 12.3311   | 5.93842  | 2.59316  |
| LOC104879882              | 0         | 7.84439  | 0        |
| LOC100242338              | 1.53475   | 7.47506  | 2.86881  |
| LOC100854756              | 0.361668  | 0.499924 | 1.61055  |
| LOC104879909              | 0         | 0.931349 | 1.72047  |
| LOC100264525              | 0.51425   | 3.25385  | 6.69821  |
| LOC100249049              | 1.75455   | 6.88567  | 9.70371  |
| LOC100250701              | 0.178776  | 1.42991  | 2.63656  |
| LOC100255878              | 1.31599   | 7.63785  | 20.4742  |
| LOC100266458              | 0.669495  | 5.94781  | 2.51385  |
| LOC100244116              | 1.2118    | 4.36396  | 5.92019  |
| LOC100256084              | 0.724563  | 1.27638  | 3.31182  |
| LOC100247381              | 1.49924   | 0.554655 | 0.187474 |
| LOC100264539              | 34.6748   | 33.7271  | 137.143  |
| LOC100262762              | 106.723   | 26.3254  | 103.546  |
| LOC100266173              | 0         | 0.110847 | 5.01296  |
| LOC100853240              | 0.344646  | 0.472796 | 1.98137  |
| LOC100254367              | 15.816    | 6.76205  | 42.351   |
| LOC100266331              | 278.921   | 61.3746  | 156.027  |
| LOC100262890              | 1.15675   | 0.450493 | 0.234912 |
| LOC100244355              | 2.12034   | 13.3411  | 29.7516  |
| LOC100262151              | 2.36219   | 8.9487   | 1.72487  |
| LOC100251912              | 9.04434   | 41.2721  | 17.1786  |
| LOC104879960              | 0.805994  | 3.19869  | 0.729761 |
| LOC100241535              | 3.0289    | 0.404362 | 2.90735  |
| LOC100265386              | 4.53994   | 10.5947  | 20.5218  |
| LOC100246655              | 6.37582   | 0.459707 | 2.65589  |
| LOC104879974              | 0.329213  | 0.227131 | 1.10095  |
| LOC100252978              | 0.520876  | 4.11846  | 5.46185  |

|                           |           |           |          |
|---------------------------|-----------|-----------|----------|
| LOC104879975              | 1.40289   | 4.48015   | 6.4596   |
| LOC100251316              | 2.65474   | 93.7578   | 3.87568  |
| LOC100250354              | 2.76183   | 17.5992   | 10.2675  |
| LOC100259062              | 0.487315  | 3.00273   | 0.544183 |
| LOC104880008              | 0.700259  | 2.39387   | 0.32957  |
| LOC104880031              | 0.611679  | 4.22177   | 1.20577  |
| LOC104880016              | 3.5345    | 20.7704   | 3.91937  |
| LOC100249984              | 2.0151    | 30.1933   | 9.15661  |
| LOC100244761,LOC100249885 | 54.5423   | 152.094   | 422.295  |
| LOC100263665              | 0.639682  | 3.04895   | 0.660475 |
| LOC100261985              | 86.5836   | 44.2452   | 538.983  |
| LOC100244729              | 309.888   | 72.6051   | 154.452  |
| LOC100260104              | 0.148816  | 2.57313   | 3.19665  |
| LOC100263725              | 0.0818183 | 2.1896    | 1.28006  |
| LOC100243165              | 1.74387   | 3.19104   | 0.356427 |
| LOC100853283              | 2.12019   | 0.305437  | 3.18675  |
| LOC100261834              | 0.628785  | 0.264436  | 1.27236  |
| LOC100251645              | 3.16125   | 13.5412   | 5.19759  |
| PIP2%3B3                  | 31.2125   | 99.5923   | 268.89   |
| LOC104880058              | 0.0470151 | 0.203999  | 3.15097  |
| LOC100854914              | 0.326673  | 1.07765   | 1.66019  |
| LOC100267116              | 8.77334   | 1.19163   | 2.44058  |
| LOC100265405              | 0.079771  | 1.27387   | 1.49062  |
| LOC100256772              | 1.15438   | 5.25511   | 12.8514  |
| LOC100267121              | 1.84015   | 13.4219   | 4.72584  |
| LOC100253445              | 0.271882  | 0.597639  | 4.57471  |
| LOC100248309              | 0.358841  | 1.57123   | 0.56389  |
| LOC100241385              | 0.973626  | 0.539167  | 2.23945  |
| LOC100259551              | 334.696   | 76.4578   | 224.462  |
| LOC100263156              | 1.95939   | 9.53315   | 6.89312  |
| LOC100233051              | 8.94775   | 2.21951   | 18.4417  |
| LOC100240931              | 1.88072   | 4.9956    | 8.62543  |
| LOC100258048              | 0.351544  | 2.64911   | 0.132259 |
| LOC100249316              | 47.5769   | 6.83508   | 39.1291  |
| LOC100244158              | 1.93677   | 0.919231  | 0.266047 |
| LOC100242625              | 0.0834811 | 1.88231   | 0.565308 |
| LOC100245906              | 2.24622   | 0.0826513 | 11.9993  |
| LOC100247753              | 6.88325   | 0.192388  | 0        |
| LOC100233126              | 3.80707   | 7.4964    | 17.4476  |
| LOC100256304              | 1.2417    | 8.72702   | 1.76377  |
| LOC100246006              | 0.0193659 | 0.142781  | 1.07314  |
| LOC100263174              | 0.701305  | 1.6237    | 3.70433  |
| LOC100258036              | 0.538657  | 1.32729   | 3.01985  |
| LOC100245964              | 1.02967   | 2.73491   | 0.515923 |
| LOC100254525              | 1.23223   | 0.275887  | 4.1339   |
| LOC100254636              | 1.55258   | 1.08758   | 6.86332  |
| LOC100261446              | 68.1148   | 10.1572   | 1.76281  |

|              |          |           |           |
|--------------|----------|-----------|-----------|
| LOC100240971 | 0.368912 | 0.0208561 | 10.5362   |
| LOC100264776 | 0.943888 | 2.00977   | 7.25752   |
| LOC100251138 | 2.06885  | 0.516481  | 2.52654   |
| LOC100255435 | 0.153767 | 1.1928    | 0.75338   |
| TIP1%3B2     | 134.466  | 250.297   | 769.569   |
| LOC104880140 | 0        | 1.34369   | 0.244525  |
| LOC100243497 | 24.2149  | 47.8993   | 110.138   |
| LOC100853129 | 6.07746  | 19.6131   | 26.8784   |
| LOC100252129 | 156.606  | 67.7338   | 327.397   |
| LOC100248729 | 2.20169  | 4.50698   | 13.6589   |
| GDHB         | 2.8859   | 14.3411   | 27.7331   |
| LOC100265797 | 0.200998 | 0.686259  | 2.97251   |
| LOC100855221 | 388.329  | 0.23458   | 17.5205   |
| LOC100255467 | 0.925074 | 0.420864  | 2.38736   |
| LOC100241812 | 1.46882  | 3.84811   | 8.17449   |
| LOC100250439 | 1.17656  | 7.94421   | 1.91287   |
| LOC104879969 | 0.712233 | 2.24799   | 0.507568  |
| LOC100265706 | 4.50045  | 0.382565  | 0.0688805 |
| LOC100262048 | 1.20747  | 0         | 0.440516  |
| LOC100241637 | 693.998  | 548.02    | 44.4104   |
| GRIP32       | 156.222  | 421.129   | 62.3712   |
| LOC100249668 | 0.24474  | 2.73947   | 4.16614   |
| LOC100247933 | 1.41586  | 6.41164   | 4.283     |
| LOC100246087 | 50.9839  | 32.697    | 8.88403   |
| LOC100252982 | 21.8543  | 40.9652   | 89.5911   |
| LOC100246161 | 2.02228  | 2.06109   | 0.462097  |
| LOC100255650 | 0.714738 | 2.98265   | 2.71601   |
| LOC100250551 | 2.30951  | 12.1786   | 7.46539   |
| LOC100262692 | 0.410685 | 5.5176    | 0.231698  |
| LOC100247091 | 1.95529  | 1.16193   | 0.392841  |
| LOC100244757 | 0.283978 | 7.61819   | 1.34448   |
| LOC104877317 | 2.10504  | 13.3244   | 1.74687   |
| LOC100243128 | 0.196404 | 1.73402   | 0.257035  |
| LOC100256885 | 1.20887  | 0.133281  | 0.0503045 |
| LOC100251671 | 4.31221  | 4.13797   | 17.6439   |
| CIPK08       | 12.3507  | 2.06747   | 15.457    |
| LOC100241389 | 1.16044  | 0.266134  | 0.342985  |
| LOC100255013 | 5.66221  | 36.0681   | 45.6463   |
| LOC100243039 | 4.1702   | 1.97358   | 15.0612   |
| LOC100261951 | 38.2947  | 24.4875   | 4.68218   |
| LOC100249911 | 0.67302  | 0.39918   | 3.95409   |
| LOC100255056 | 0.844387 | 13.5737   | 5.1922    |
| LOC100241372 | 0.889542 | 17.0002   | 7.62546   |
| LOC100256832 | 8.90415  | 1.46422   | 4.571     |
| LOC100241377 | 14.1284  | 23.6665   | 4.82379   |
| MLO11        | 0.734941 | 11.7801   | 0.818975  |
| LOC100251731 | 3.81432  | 1.28658   | 7.11422   |



|                           |           |           |           |
|---------------------------|-----------|-----------|-----------|
| LOC100256751              | 2.66275   | 13.3314   | 4.70092   |
| LOC100255195              | 9.27198   | 22.1732   | 2.73046   |
| LOC100263625              | 0.764229  | 1.40886   | 0.287453  |
| LOC104880170              | 2.15548   | 0.38056   | 3.58344   |
| LOC100245911              | 22.0992   | 6.60161   | 65.0179   |
| LOC100245988              | 1.42286   | 0.126809  | 8.11859   |
| LOC100854994              | 0         | 0.754669  | 2.15777   |
| LOC104880167              | 0.808712  | 5.9363    | 1.64345   |
| LOC100240776              | 2.10372   | 0.950347  | 26.7159   |
| LOC100246012              | 8.55564   | 62.8077   | 13.1845   |
| LOC100264798              | 0.0697542 | 4.52564   | 0.311146  |
| LOC100254532              | 4.62138   | 1.42729   | 6.83212   |
| LOC100240763              | 94.8055   | 3.63375   | 1.32684   |
| LOC100254493              | 0.179146  | 1.01479   | 1.44131   |
| LOC100240876              | 0.169161  | 0.0893363 | 4.93431   |
| LOC100264942              | 6.22909   | 5.56452   | 29.0644   |
| LOC104880155              | 1.50815   | 2.83889   | 6.34457   |
| LOC100251141              | 0.0578701 | 0         | 22.6524   |
| LOC100240912              | 0         | 0.0303183 | 7.11621   |
| LOC104880145              | 2.32283   | 0.26613   | 0.0721513 |
| LOC100258024              | 0.281826  | 1.0528    | 0.159662  |
| LOC100259738              | 3.60727   | 1.54016   | 8.13588   |
| LOC100250246              | 2.80934   | 0.288136  | 3.83479   |
| LOC100246902,LOC100248767 | 2.31908   | 13.3952   | 9.6023    |
| LOC100264066              | 3.53475   | 6.13968   | 15.8911   |
| LOC100248651              | 0.848874  | 2.16544   | 0.407447  |
| LOC100255547              | 0.297867  | 0.100041  | 4.46291   |
| LOC100247001              | 1.08363   | 0.527838  | 2.29399   |
| LOC100853352              | 24.7115   | 19.7294   | 5.69618   |
| LOC100855222              | 1.86858   | 12.7297   | 5.18766   |
| LOC100855149              | 7.02441   | 47.6      | 67.5262   |
| LOC100852723              | 8.42735   | 1.36287   | 6.33716   |
| LOC100265807              | 0.524444  | 1.28338   | 2.19205   |
| LOC100253833              | 2.35128   | 19.8888   | 27.083    |
| LOC100255639              | 3.36906   | 20.078    | 17.868    |
| LOC100257217              | 1.73137   | 4.54295   | 29.5474   |
| MYBCS1                    | 13.9985   | 3.72541   | 22.8783   |
| LOC100250413              | 2.24153   | 14.8068   | 6.94359   |
| LOC100248614              | 0.507717  | 3.47897   | 3.729     |
| LOC104880112              | 1.4992    | 2.55236   | 6.9161    |
| LOC100245168              | 5.70914   | 0.820125  | 1.68444   |
| LOC104880101              | 3.85944   | 7.73019   | 1.37854   |
| LOC100260694              | 1.38904   | 7.12792   | 0.723279  |
| LOC100257201              | 0         | 0.0218134 | 1.25163   |
| LOC104880196              | 1.74284   | 2.06756   | 0.465548  |
| LOC100251413              | 0.659853  | 2.50665   | 24.6545   |
| LOC100258290              | 6.66054   | 2.69068   | 44.2038   |

|                           |           |          |          |
|---------------------------|-----------|----------|----------|
| LOC100253160              | 16.1466   | 3.01429  | 9.46257  |
| LOC100254856              | 1.06047   | 1.38859  | 0.209129 |
| LOC100265188              | 35.0015   | 66.9708  | 15.266   |
| LOC100246433              | 0.613271  | 0        | 3.09419  |
| LOC100266896              | 0.48538   | 6.90051  | 1.26084  |
| LOC100249800              | 0.887517  | 5.3718   | 4.59459  |
| LOC104880208              | 6.24774   | 13.2145  | 30.4121  |
| LOC100244649              | 1.79349   | 1.16144  | 0.349458 |
| LOC100855049              | 0.0290021 | 0.328669 | 2.75841  |
| LOC100265181              | 1.74799   | 14.6926  | 17.9262  |
| LOC104880217              | 0.105462  | 0.591913 | 2.98317  |
| CWINV                     | 3.61217   | 24.7115  | 2.5491   |
| LOC100241282              | 0.304925  | 3.30443  | 2.93373  |
| LOC100256592              | 4.82265   | 21.1884  | 16.4083  |
| LOC100251455              | 4.97087   | 12.746   | 2.09272  |
| LOC100242932              | 0.045181  | 1.47839  | 0.259398 |
| LOC104877404              | 2.06412   | 0        | 0        |
| LOC100248142              | 46.1037   | 6.36833  | 6.6425   |
| LOC100261686,LOC104880223 | 0.0510976 | 2.33978  | 0.992438 |
| LOC100266874              | 0.185914  | 3.54232  | 1.30308  |
| LOC104877427              | 2.0246    | 14.7604  | 23.6028  |
| LOC100249745              | 30.9427   | 75.3359  | 11.3288  |
| LOC100267002              | 0         | 2.45416  | 0.768003 |
| LOC100248013              | 0.967003  | 2.83351  | 4.41584  |
| LOC100241176              | 28.2787   | 18.8636  | 84.6863  |
| LOC100266912              | 0.169609  | 0.348428 | 5.62632  |
| LOC104880252              | 0.196015  | 1.19323  | 0.830684 |
| LOC100249812              | 0.524841  | 5.67789  | 0.298619 |
| LOC100246445              | 0.365429  | 1.3629   | 6.44518  |
| LOC100253157              | 3.15046   | 0.464645 | 0.608731 |
| LOC104880259              | 131.603   | 35.8227  | 14.2452  |
| LOC100266263              | 1.35376   | 3.22235  | 15.4218  |
| LOC100250809              | 0         | 4.91166  | 0.320624 |
| LOC100255171              | 0.10114   | 4.9947   | 1.82395  |
| LOC100242509,LOC100250015 | 5.63744   | 5.06779  | 24.7764  |
| LOC100259222              | 3.73221   | 1.9703   | 26.045   |
| LOC100266893              | 0         | 0.050605 | 4.54486  |
| LOC100266984,LOC104880318 | 7.27744   | 0.438522 | 8.70827  |
| LOC100266987              | 22.4595   | 18.7041  | 2.99692  |
| LOC100246437              | 2.61328   | 2.31299  | 0.480574 |
| LOC100265249              | 2.79956   | 6.87596  | 1.56227  |
| LOC104880282              | 2.46724   | 7.27219  | 16.5881  |
| LOC104880342              | 2.84522   | 0        | 0        |
| LOC100247196              | 0.234556  | 1.69298  | 2.70596  |
| LOC104880337              | 0         | 5.23257  | 0.622018 |
| LOC100261932,LOC104880348 | 0.257319  | 4.72778  | 4.82781  |
| LOC104880349,LOC104880350 | 7.49603   | 1.435    | 0.788055 |

|                           |           |           |          |
|---------------------------|-----------|-----------|----------|
| LOC104880338              | 0         | 2.95299   | 3.92764  |
| LOC104880339              | 0.0514446 | 0         | 3.93586  |
| LOC104877381              | 0         | 0.442734  | 2.30385  |
| LOC100256746              | 0.514381  | 5.2022    | 7.69856  |
| LOC104880354              | 3.88532   | 0         | 1.48782  |
| LOC100265363              | 0.239298  | 1.97244   | 1.43254  |
| LOC100265463              | 0.963473  | 2.6395    | 5.00308  |
| LOC104880356              | 51.5974   | 205.527   | 1144.38  |
| LOC100261184              | 15.0289   | 1.39493   | 10.5092  |
| LOC104880391              | 0.422557  | 3.25385   | 4.24772  |
| LOC100255370              | 9.87803   | 0.421553  | 0.27422  |
| LOC104880397              | 0.161188  | 2.23487   | 2.61244  |
| LOC100256964              | 0.125801  | 3.66411   | 1.55631  |
| LOC104880403              | 0.0987054 | 1.09121   | 0.734918 |
| LOC100265643              | 4.73754   | 0.746353  | 2.35173  |
| LOC100267352              | 8.54958   | 1.77916   | 6.30811  |
| LOC104880426              | 5.98589   | 0.280908  | 3.48006  |
| LOC100267011              | 0.199787  | 0.0212852 | 2.07058  |
| LOC100246222              | 2.52212   | 0.614869  | 47.724   |
| LOC104880434              | 5.64049   | 3.55845   | 0        |
| LOC100265044              | 0.0428033 | 1.24119   | 0        |
| LOC100261598              | 0         | 4.29948   | 7.5316   |
| LOC100244700              | 11.4961   | 8.29351   | 33.6234  |
| LOC104880200              | 1.46488   | 0         | 0        |
| LOC100251477              | 0         | 0.0146733 | 2.09527  |
| LOC104880292              | 0.60627   | 1.27615   | 0.219341 |
| LOC100265183              | 0.343825  | 0.486458  | 4.56384  |
| LOC100259980              | 9.57704   | 1.16721   | 0.26433  |
| LOC100244575              | 0         | 0         | 4.3683   |
| LOC100242977              | 0.29731   | 0.361287  | 1.94418  |
| LOC104880231              | 4.49104   | 15.9368   | 1.84429  |
| HP2                       | 0.0423627 | 0         | 1.09311  |
| LOC100248099              | 3.479     | 23.4331   | 38.5441  |
| LOC100254908              | 0.455206  | 1.93397   | 1.97297  |
| TIP2%3B1                  | 875.909   | 159.13    | 518.064  |
| LOC100253148              | 0         | 1.11083   | 1.16816  |
| LOC100254998              | 0.546432  | 0.207188  | 2.25741  |
| LOC100852761              | 0.797239  | 2.21176   | 0        |
| LOC100256715              | 2.25956   | 1.51378   | 10.9737  |
| LOC100241136              | 30.5606   | 39.9566   | 5.6492   |
| LOC100241247              | 1.53275   | 0.854087  | 0.230079 |
| LOC100251419              | 1.81132   | 8.89238   | 1.1543   |
| LOC100246279              | 2.90779   | 1.53181   | 0.202016 |
| LOC104880309              | 0.452581  | 2.04369   | 0.709341 |
| LOC100265187,LOC104877437 | 3.275     | 19.3035   | 5.30081  |
| LOC100247488              | 23.9584   | 1.0072    | 3.13221  |
| LOC100245657              | 7.0768    | 0.431384  | 0        |

|                           |           |           |           |
|---------------------------|-----------|-----------|-----------|
| LOC100242207              | 8.52643   | 2.73254   | 1.30236   |
| LOC100853353              | 4.03065   | 10.7402   | 1.95349   |
| LOC104880276              | 2.25157   | 0         | 0         |
| LOC100259959              | 0.419694  | 3.93885   | 5.26634   |
| LOC100244585,LOC104877375 | 0.110434  | 0.242114  | 1.23346   |
| LOC100264455              | 0         | 0.282804  | 1.52148   |
| LOC100242170              | 91.8288   | 18.8589   | 15.4805   |
| LOC100268109              | 0.808756  | 3.57351   | 4.21333   |
| LOC100268101              | 0.964911  | 2.56829   | 7.89343   |
| LOC100249060              | 0         | 0.122171  | 1.67542   |
| LOC100255943              | 2.57219   | 26.0859   | 9.53523   |
| LOC100854265              | 1.61053   | 0.218353  | 0.0179258 |
| LOC100265292              | 0.218327  | 2.65798   | 1.14186   |
| LOC100251433              | 0.377457  | 2.30822   | 1.33426   |
| LOC104880347              | 3.94392   | 0         | 0.678363  |
| LOC104880364              | 0         | 1.80273   | 1.49526   |
| LOC100262015              | 2.29416   | 6.0785    | 11.9204   |
| LOC100251973              | 0.629403  | 0.765789  | 5.3559    |
| LOC104880373              | 1.38472   | 2.25811   | 0.108346  |
| LOC100263973              | 5.79991   | 12.5669   | 137.717   |
| LOC100244938,LOC100250075 | 0.0370005 | 0.513016  | 44.9356   |
| LOC100260288              | 430.284   | 13.3036   | 76.4016   |
| LOC104880387              | 2.9685    | 0         | 12.0301   |
| LOC100247976              | 1.06726   | 5.57755   | 0.510074  |
| LOC100242837              | 4.61759   | 3.2923    | 0         |
| LOC100852884              | 3.76283   | 13.1271   | 0.471873  |
| LOC100852503              | 1.04547   | 0.0414312 | 0         |
| LOC104880420,LOC104880421 | 2.44998   | 0         | 0         |
| LOC104880442              | 1.0915    | 5.29022   | 0.0817577 |
| LOC100263357              | 0.32636   | 1.04923   | 0.235357  |
| LOC100254746              | 0.843237  | 7.32717   | 4.39803   |
| LOC100854019              | 0.360557  | 2.25776   | 0         |
| LOC100249623              | 0         | 1.7214    | 0.0263081 |
| LOC100256402              | 0.925519  | 0.336756  | 2.15717   |
| LOC100855028              | 2.4596    | 0         | 0.314246  |
| LOC100249107              | 0.864892  | 0.158259  | 1.21287   |

**Supplemental Data Set 2. Differently expressed genes among grape young leaf samples.**

| Gene                      | BB       | RG        | DK        |
|---------------------------|----------|-----------|-----------|
| LOC100249028              | 9.96887  | 31.1532   | 4.93794   |
| LOC100264573              | 1.35342  | 0.163581  | 0.024902  |
| LOC100261136              | 1.72775  | 0.0907905 | 1.83301   |
| LOC100260989              | 0.224828 | 20.4608   | 4.13314   |
| LOC100260982              | 1.96063  | 5.89604   | 1.11651   |
| LOC100257798,LOC104879009 | 2.64554  | 15.7567   | 9.78175   |
| LOC100242416              | 7.14353  | 0.977537  | 23.9124   |
| LOC100267908              | 12.0252  | 0.915437  | 9.46132   |
| LOC100254256              | 35.3395  | 1.54629   | 2.05003   |
| LOC100256027              | 0.593394 | 4.55641   | 0.574897  |
| LOC104879344              | 0.443203 | 23.614    | 0         |
| LOC100247541              | 9.79197  | 25.3903   | 0.994903  |
| LOC104878923              | 0.988895 | 5.03007   | 4.02141   |
| LOC104878924              | 3.54318  | 17.4379   | 0.0750254 |
| LOC100263000              | 1.11906  | 21.7122   | 1.50537   |
| LOC100250719              | 1.27903  | 4.21538   | 0.918334  |
| LOC100259307              | 92.3636  | 7.08287   | 78.6652   |
| LOC100257723              | 30.2384  | 6.62268   | 13.9905   |
| LOC100249239              | 4.88736  | 15.2776   | 3.55527   |
| LOC100247323              | 12.7086  | 52.1568   | 5.83754   |
| LOC100245576              | 1.17447  | 8.1305    | 1.86688   |
| LOC100262743              | 7.4926   | 12.793    | 1.75435   |
| LOC100257622              | 0.2956   | 2.46229   | 0.119108  |
| LOC100262828              | 47.2348  | 85.4249   | 4.95343   |
| LOC100254317              | 12.4303  | 4.63447   | 25.3799   |
| MYBC2-L1                  | 63.0277  | 8.77917   | 18.4024   |
| LOC104881043              | 3.89617  | 19.0742   | 10.2007   |
| LOC100261077              | 49.7619  | 10.0758   | 3.88416   |
| LOC100266230              | 3.76019  | 0.540246  | 11.5916   |
| LOC100267971              | 1.4717   | 0         | 0.0788296 |
| LOC100254219              | 31.5236  | 1.54948   | 5.52718   |
| LOC100853085              | 46.4188  | 4.83189   | 30.0199   |
| LOC100262819              | 188.134  | 30.1132   | 87.0742   |
| LOC100250842              | 2.90817  | 12.0936   | 4.31152   |
| LOC100264648              | 9.87423  | 0.0590901 | 1.53113   |
| LOC100266435,LOC100853103 | 41.7379  | 4.71711   | 20.1109   |
| LOC100268011              | 2.79249  | 12.1593   | 3.03804   |
| LOC100257690              | 31.3867  | 3.8232    | 22.7491   |
| LOC100247486              | 1.20673  | 0.262603  | 1.2426    |
| LOC100233130              | 2.46473  | 40.3266   | 41.1723   |
| LOC100259451              | 1.04754  | 0.057155  | 0         |
| LOC100244068              | 1.33825  | 8.28418   | 0.167605  |
| LOC100252431              | 16.633   | 5.96234   | 3.87877   |
| LOC100852957              | 180.273  | 85.4138   | 24.9357   |

|                           |          |          |           |
|---------------------------|----------|----------|-----------|
| LOC100250014              | 1.60561  | 0        | 0.0817307 |
| LOC100260250              | 7.58014  | 9.53856  | 30.6318   |
| LOC100241353              | 70.416   | 15.5565  | 55.8109   |
| LOC100260266              | 557.846  | 14.4969  | 765.324   |
| LOC104879599              | 0        | 5.09028  | 5.39292   |
| LOC100854095              | 0.269129 | 9.69966  | 10.4913   |
| LOC100852726              | 24.6237  | 32.4399  | 2.04591   |
| LOC100260439              | 0.109637 | 0        | 1.14268   |
| LOC100267362              | 1.3257   | 0.492087 | 2.20093   |
| LOC104879964              | 1.32387  | 5.90321  | 3.91473   |
| LOC100260341              | 20.7399  | 1.66852  | 8.02372   |
| LOC100262076              | 1.24804  | 0.684024 | 7.75162   |
| LOC104879808              | 0.061701 | 1.16931  | 0         |
| LOC100256814              | 2.35493  | 0.585045 | 1.62801   |
| LOC100249919              | 4.32214  | 0.814686 | 0.994923  |
| LOC100265355              | 12.0478  | 1.7393   | 10.8784   |
| LOC100248178              | 1.49861  | 10.1253  | 0.887315  |
| LOC100251684              | 4.7326   | 0.14698  | 0.219316  |
| LOC100257438              | 1.90604  | 11.397   | 7.95428   |
| LOC104880113              | 0        | 0        | 1.15162   |
| LOC100264433              | 7.64568  | 1.31437  | 5.5655    |
| LOC100251346              | 0.135667 | 1.07159  | 0.0579688 |
| LOC100248212              | 39.9976  | 26.911   | 4.3527    |
| LOC100247728,LOC100264875 | 0.907429 | 5.25721  | 3.23276   |
| LOC104880699              | 0        | 2.13813  | 0         |
| LOC104880458              | 329.141  | 1685.18  | 706.927   |
| LOC104880461              | 271.004  | 1243.37  | 396.134   |
| LOC100242487,LOC100264777 | 2.56418  | 25.1121  | 3.86721   |
| LOC100266653              | 1.84201  | 2.9407   | 0         |
| LOC100244321              | 0.848933 | 1.61072  | 0         |
| LOC100254585              | 0.997839 | 5.14628  | 0         |
| LOC100263123              | 2.08209  | 3.95233  | 0         |
| LOC100240864              | 0.931945 | 4.29152  | 0.337635  |
| LOC100259708              | 7.09524  | 0        | 0.403213  |
| LOC104880513              | 0        | 8.37581  | 4.55297   |
| FAOMT                     | 3.47472  | 20.9612  | 9.31522   |
| LOC100852958              | 21.7898  | 89.5097  | 33.8661   |
| LOC100853551              | 0.456894 | 2.52065  | 0.400206  |
| LOC104880633              | 0.244785 | 0.305426 | 4.79122   |
| LOC100245367              | 14.6089  | 40.0386  | 8.92728   |
| LOC100245472              | 0.435092 | 0        | 1.14144   |
| LOC100248984              | 78.5356  | 15.3945  | 27.3977   |
| LOC100245456              | 1.93347  | 0.398854 | 3.44268   |
| LOC100259202              | 2.11797  | 3.29307  | 0.774387  |
| LOC100249034              | 1.34822  | 0.124654 | 0.370816  |
| LOC100257668              | 14.9162  | 3.95404  | 19.3082   |
| LOC100247567              | 1.75653  | 3.64758  | 0.688111  |

|                           |           |          |           |
|---------------------------|-----------|----------|-----------|
| LOC100254419,LOC104877428 | 14.1596   | 4.07537  | 1.74313   |
| LOC100855161              | 3.13645   | 13.1322  | 1.22487   |
| LOC104879102              | 0.0267633 | 1.249    | 0.184887  |
| LOC100266416              | 53.3423   | 10.5199  | 13.1268   |
| LOC104878973              | 30.4038   | 8.29308  | 0.993358  |
| LOC104878972              | 1.08193   | 0.219446 | 0         |
| LOC104878959              | 7.04703   | 4.10969  | 1.51669   |
| LAR1                      | 62.6957   | 15.0952  | 28.3355   |
| LOC100249140              | 22.6918   | 51.1258  | 8.89156   |
| LOC100257863              | 1.11208   | 0        | 0         |
| LOC100244117              | 8.94742   | 9.57991  | 2.3574    |
| LOC100245810              | 0.134751  | 2.23809  | 0.514347  |
| LOC100261252              | 0.44341   | 1.11707  | 2.57707   |
| LOC100852497              | 4.27072   | 1.88878  | 9.31676   |
| LOC100252491              | 1.1978    | 0.836269 | 3.63894   |
| LOC100261088              | 0.55795   | 0.670912 | 3.99215   |
| LOC100243915              | 6.21363   | 20.1266  | 4.99373   |
| LOC104882362              | 7.72063   | 26.6427  | 1.74585   |
| LOC104882357              | 6.72897   | 0.124707 | 0.944702  |
| LOC100262736              | 6.70958   | 0.582349 | 0.0667966 |
| LOC104881607              | 0.328726  | 3.35613  | 0         |
| LOC100242324              | 13.7919   | 38.7209  | 2.05795   |
| LOC100250994              | 0.349801  | 2.16078  | 0.428234  |
| LOC100257695              | 19.4318   | 83.5981  | 31.0289   |
| LOC100266279              | 0.612892  | 10.3228  | 3.32969   |
| LOC104880150              | 5.98674   | 1.58074  | 1.47548   |
| LOC100266435              | 23.2524   | 3.48612  | 16.9589   |
| LOC100254156              | 48.0869   | 85.0631  | 2.55199   |
| LOC100255972              | 3.74196   | 22.3549  | 10.4127   |
| LOC100249254,LOC100265597 | 1.03522   | 7.86497  | 20.3953   |
| LOC100852659              | 11.5253   | 19.4335  | 1.03198   |
| LOC104879119              | 7.11738   | 0.145374 | 0         |
| LOC100247586              | 38.2738   | 5.41409  | 42.7638   |
| LOC100264447              | 31.4216   | 6.92587  | 64.8532   |
| LOC100266215              | 0.644953  | 4.87908  | 1.09411   |
| LOC104879922              | 1.36125   | 0.388365 | 1.62481   |
| LOC100261157              | 15.7653   | 2.42622  | 14.5514   |
| LOC100246480              | 0.0599413 | 3.08532  | 0         |
| LOC100248190              | 0.783012  | 10.1054  | 7.37658   |
| LOC100267199              | 16.8083   | 4.14432  | 25.9905   |
| LOC100244715              | 1.03128   | 14.125   | 7.00388   |
| LOC104879710              | 147.285   | 207.842  | 40.4756   |
| LOC100852822              | 124.092   | 143.391  | 28.0614   |
| LOC100243339              | 18.9705   | 3.3855   | 2.64806   |
| LOC100262106              | 16.1291   | 34.7774  | 7.37673   |
| LOC100246832              | 32.2996   | 21.5039  | 87.0335   |
| LOC100241577              | 20.4237   | 4.2014   | 10.0284   |

|                                        |           |          |           |
|----------------------------------------|-----------|----------|-----------|
| LOC100245028                           | 2.01442   | 3.39778  | 0.561796  |
| LOC100255163                           | 5.44513   | 36.4873  | 7.3567    |
| LOC104879728                           | 59.1238   | 0.886297 | 1.9777    |
| LOC100241338                           | 1.2336    | 12.4064  | 5.32696   |
| LOC104880135                           | 1.16133   | 5.12103  | 3.90247   |
| LOC100263380                           | 3.3175    | 0.790006 | 0.210989  |
| LOC104880670                           | 1.30413   | 1.9338   | 5.356     |
| LOC100251075,LOC104880264,LOC104880266 | 3.20265   | 3.85286  | 18.3448   |
| LOC100852829                           | 1.20567   | 1.41081  | 0.203826  |
| LOC100259604                           | 9.99562   | 6.21603  | 2.12      |
| LOC100251213                           | 0.716204  | 0.375603 | 4.65128   |
| LOC100855198                           | 0.286335  | 1.47819  | 3.06539   |
| LOC100242071                           | 0.451034  | 3.61625  | 6.90023   |
| LOC100241971                           | 1.24617   | 0.301017 | 4.09925   |
| LOC100260747                           | 39.2553   | 11.5367  | 7.12998   |
| LOC100255784                           | 3.45884   | 11.6548  | 1.86629   |
| LOC100264403                           | 0.0964649 | 0        | 13.413    |
| LOC100257506                           | 0.440747  | 2.80072  | 1.59127   |
| LOC100248869                           | 0.642735  | 0.236109 | 1.71502   |
| LOC104880450                           | 5.52201   | 3.42549  | 13.9982   |
| THI1-2                                 | 46.0409   | 750.797  | 279.186   |
| LOC104880451                           | 1.59985   | 0.183666 | 1.52436   |
| LOC100250414                           | 1.86595   | 1.14382  | 0.397396  |
| LOC100248583                           | 11.6824   | 63.1736  | 16.903    |
| LOC100267596                           | 0         | 3.25688  | 0         |
| LOC104880467                           | 0.524598  | 1.90222  | 0.231607  |
| LOC100855171                           | 1.16075   | 6.22696  | 7.38626   |
| LOC104880486                           | 13.5933   | 2.79344  | 1.52346   |
| LOC100266953                           | 6.40441   | 15.7728  | 26.4064   |
| LOC100266966                           | 0.370043  | 3.70722  | 0.0691457 |
| CIPK16                                 | 57.0904   | 1.48077  | 19.3415   |
| LOC100244564                           | 18.956    | 3.95227  | 18.5758   |
| LOC100246308                           | 2.04111   | 16.9597  | 0.736157  |
| LOC100246406                           | 1.81595   | 2.7635   | 11.7068   |
| LOC104880495                           | 2.26421   | 0.474567 | 10.0186   |
| LOC104880494                           | 2.23973   | 0.976315 | 14.9165   |
| LOC100251456                           | 37.5882   | 4.01393  | 8.62249   |
| LOC104880497                           | 21.5159   | 5.05281  | 0.694768  |
| LOC100262300                           | 3.599     | 15.6518  | 3.66148   |
| LOC100241745                           | 2531.58   | 735.687  | 3541.81   |
| LOC100854721                           | 10.8383   | 7.30905  | 2.41793   |
| LOC100251443                           | 4.42631   | 8.86755  | 1.34357   |
| LOC100254905                           | 10.8851   | 0.211644 | 0.149211  |
| LOC100241263,LOC104877336              | 10.4434   | 5.03247  | 2.23484   |
| LOC100246387                           | 2.81743   | 2.31859  | 0.360724  |
| LOC100249695                           | 4.12244   | 10.4458  | 1.12084   |
| LOC100244546                           | 3.379     | 37.8931  | 0.377336  |



|              |           |          |          |
|--------------|-----------|----------|----------|
| LOC100256656 | 49.212    | 87.2853  | 1.28752  |
| LOC100246382 | 4.81809   | 26.1253  | 0.737746 |
| LOC104880516 | 1.15147   | 0        | 0.252827 |
| LOC100261664 | 0.964154  | 1.77046  | 0        |
| LOC100251427 | 0.744741  | 1.72787  | 0        |
| LOC100254909 | 2.59188   | 15.7876  | 4.76407  |
| LOC100263534 | 6.26164   | 16.0302  | 33.4979  |
| LOC104880529 | 5.25014   | 8.00608  | 0        |
| LOC100268068 | 2.84775   | 0.525796 | 0.246466 |
| LOC104877323 | 1.83948   | 0        | 0.827853 |
| LOC104877439 | 4.25043   | 0.178808 | 0.815401 |
| LOC100267910 | 5.11047   | 1.02036  | 2.58808  |
| LOC100264549 | 26.2213   | 4.11374  | 6.84178  |
| LOC104880535 | 14.8553   | 36.9115  | 5.53301  |
| LOC104880537 | 0.716304  | 0.829802 | 53.7221  |
| LOC100252820 | 15.8937   | 59.7248  | 13.0072  |
| LOC100254557 | 7.65099   | 94.258   | 3.54346  |
| LOC104880583 | 0         | 0        | 1.04337  |
| LOC100242590 | 0.343888  | 0        | 1.39945  |
| LOC100240855 | 1.79289   | 1.26379  | 0.270546 |
| LOC104880591 | 1.51323   | 0.383096 | 0.23087  |
| LOC100264787 | 0.126143  | 0.348627 | 1.79869  |
| LOC104880596 | 0.0188366 | 0.166904 | 1.24354  |
| LOC100241181 | 2.40939   | 10.0223  | 7.14686  |
| LOC100249715 | 0.508256  | 2.04164  | 1.01096  |
| LOC100261794 | 2.28874   | 4.10686  | 0.707565 |
| LOC100257837 | 9.46189   | 1.47846  | 1.421    |
| LOC104880615 | 5.14407   | 0        | 0        |
| LOC104880608 | 15.3041   | 0        | 0        |
| LOC100255934 | 5.02348   | 23.2095  | 8.44084  |
| LOC100266208 | 12.2821   | 3.66469  | 26.2571  |
| LOC100257214 | 1.13159   | 0.157407 | 19.0596  |
| LOC104880453 | 0.477815  | 2.3135   | 0.685273 |
| LOC104880456 | 6.37691   | 27.3774  | 1.99331  |
| LOC100243449 | 6.07706   | 5.3576   | 1.33907  |
| LOC104880473 | 11.5601   | 38.8198  | 4.62531  |
| LOC100246962 | 0.440847  | 0.235802 | 2.62606  |
| LOC100853959 | 0.603032  | 0.593569 | 4.32254  |
| LOC100854252 | 3.79319   | 9.70444  | 1.74733  |
| LOC100241917 | 24.0114   | 6.6566   | 28.8894  |
| LOC100258824 | 15.5425   | 56.4647  | 14.0734  |
| LOC100252186 | 0.742179  | 5.70963  | 0.599502 |
| LOC100260521 | 591.077   | 103.714  | 178.314  |
| LOC100248784 | 34.3579   | 50.9959  | 4.33352  |
| LOC100255569 | 16.5676   | 25.5382  | 2.66437  |
| LOC100267554 | 6.39749   | 13.1442  | 0.886326 |
| LOC100250378 | 8.59363   | 5.94532  | 1.15458  |

|                           |          |           |           |
|---------------------------|----------|-----------|-----------|
| LOC100260643              | 4.76347  | 1.03819   | 1.56903   |
| LOC100243529              | 27.0439  | 0.250049  | 3.07081   |
| LOC100245259              | 0.269793 | 0.111388  | 1.61164   |
| LOC100255564              | 2.81997  | 0.96998   | 0.609457  |
| LOC100253763              | 1.63981  | 0         | 0         |
| LOC104880487              | 11.1742  | 2.4956    | 12.5764   |
| LOC100258410              | 33.1866  | 3.25285   | 1.48304   |
| LOC100241911              | 2.85293  | 0.380554  | 0.402815  |
| LOC100253808              | 1.21165  | 4.93252   | 2.51695   |
| LOC100253669              | 25.6846  | 114.651   | 24.2955   |
| LOC100232932              | 377.76   | 109.627   | 458.576   |
| LOC104880566              | 0.976133 | 0         | 1.4836    |
| LOC100266935              | 0.725725 | 16.0224   | 1.05142   |
| LOC100250720              | 1.72756  | 5.589     | 1.11911   |
| LOC100259563              | 19.8548  | 1.62934   | 6.59235   |
| LOC100256223              | 37.2964  | 7.54917   | 55.6803   |
| LOC100257998              | 0        | 0         | 3.90325   |
| LOC100247733              | 2.21231  | 19.6815   | 35.3252   |
| LOC104880600              | 1.34496  | 0.292009  | 0.82828   |
| LOC100253253,LOC104880595 | 1.1997   | 3.53907   | 0.872826  |
| LOC100247995              | 2.45057  | 22.1002   | 3.36579   |
| LOC100263475              | 0.352835 | 1.63027   | 0.999907  |
| LOC100256692              | 0.114377 | 0.0628356 | 1.63025   |
| LOC104880609              | 12.3054  | 2.89478   | 3.87281   |
| LOC104880620              | 0.534096 | 7.7401    | 1.28305   |
| LOC100244113              | 4.94268  | 12.6079   | 1.71282   |
| LOC100247370              | 92.155   | 173.28    | 0.301132  |
| LOC100245800              | 4.20573  | 3.22531   | 0         |
| LOC100249061              | 11.4088  | 22.3697   | 5.35296   |
| LOC100852952              | 1.08274  | 4.64919   | 1.18232   |
| LOC100262821              | 0.536313 | 0.483576  | 2.8734    |
| LOC100256088              | 0.66763  | 2.20214   | 0.466907  |
| LOC100255989              | 5.47201  | 9.5947    | 1.74857   |
| LOC100268094              | 20.7042  | 0.792659  | 4.64892   |
| LOC100254212              | 3.69315  | 79.0839   | 6.44261   |
| LOC100249186              | 35.4181  | 2.84006   | 3.03325   |
| LOC100257654              | 4.32368  | 2.31864   | 1.06104   |
| LOC100242271              | 0.663242 | 1.71313   | 0.16822   |
| LOC100249162              | 0        | 2.61121   | 0.0509247 |
| LOC100247336              | 14.6373  | 21.9174   | 2.44425   |
| LOC104880652              | 0.598474 | 1.40385   | 4.81791   |
| LOC100252650              | 45.8765  | 7.337     | 36.7515   |
| LOC100245678              | 7.95363  | 0.626808  | 4.75247   |
| SIUP1                     | 55.8871  | 99.727    | 12.0611   |
| LOC104880694              | 0.379152 | 3.3372    | 2.84648   |
| LOC100256872              | 19.9816  | 5.7559    | 25.3728   |
| LOC104880720              | 1.94605  | 0         | 0         |

|                           |          |           |           |
|---------------------------|----------|-----------|-----------|
| LOC100262220,LOC100265559 | 1.24225  | 0.25778   | 19.3699   |
| LOC100853727,LOC104880710 | 1.18641  | 4.29931   | 5.67418   |
| LOC100257033              | 108.185  | 15.7071   | 102.348   |
| LOC104877289              | 66.405   | 12.7772   | 35.7548   |
| LOC104880718              | 0        | 1.61686   | 0.537484  |
| LOC100258663              | 1.52916  | 7.45084   | 4.82923   |
| CYP716A15                 | 3.50474  | 7.08804   | 60.103    |
| LOC104880763              | 0        | 4.81349   | 4.05256   |
| LOC100267207              | 0.694132 | 17.7389   | 5.02828   |
| LOC104880731              | 9.91584  | 1.64428   | 1.75682   |
| LOC104880790              | 1.68485  | 2.24973   | 0.337534  |
| LOC104880789              | 0.629379 | 10.822    | 0.480682  |
| LOC100259795              | 0.125452 | 0.0224176 | 1.03142   |
| LOC100256460              | 0        | 1.29379   | 0.0890103 |
| LOC100253044              | 5.02348  | 151.088   | 50.4981   |
| LOC100247920              | 3.42648  | 65.5884   | 21.0139   |
| LOC100265066              | 1.32397  | 87.6302   | 25.4987   |
| LOC100251303,LOC100263324 | 8.61329  | 175.346   | 1.41319   |
| LOC100246166              | 0.806274 | 31.0362   | 0.856783  |
| LOC100258257              | 0.560324 | 10.7205   | 0.202849  |
| LOC100854235              | 0.244729 | 3.01032   | 0.136708  |
| LOC100241039              | 1.06469  | 0         | 0.0429441 |
| LOC100244405,LOC100247834 | 6.41809  | 21.5496   | 1.20608   |
| LOC100247315              | 0.859947 | 3.68866   | 5.1282    |
| LOC100267980              | 36.2622  | 10.9344   | 44.1019   |
| LOC100254231              | 89.9618  | 82.7522   | 8.76091   |
| LOC100254165              | 6.43156  | 0.231285  | 0.267219  |
| LOC100252622              | 48.8076  | 12.1997   | 25.7888   |
| LOC100257697              | 1.04992  | 0.548905  | 2.6683    |
| LOC100250940              | 0.790778 | 0         | 3.13954   |
| LOC100250779              | 6.74753  | 0.916094  | 0.644019  |
| LOC100247440              | 192.918  | 308.131   | 2.18477   |
| LOC100254298              | 2.64149  | 0.0973442 | 4.07311   |
| LECY1                     | 35.4823  | 7.67537   | 19.8909   |
| LOC100252681              | 0.178015 | 0.296299  | 2.12816   |
| LOC100259328              | 76.932   | 10.4878   | 13.9702   |
| LOC100256064              | 5.20677  | 23.6963   | 2.35608   |
| LOC100259323              | 31.6051  | 7.10437   | 10.2766   |
| LOC100264581              | 0.634052 | 0.483823  | 2.09031   |
| LOC100266350              | 50.999   | 19.8538   | 9.58717   |
| LOC100243875,LOC100254355 | 53.6001  | 7.37898   | 12.8347   |
| LOC100260997              | 14.9281  | 13.7573   | 3.31519   |
| LOC100252531              | 21.7396  | 49.1398   | 2.78197   |
| LOC104880644              | 1.61838  | 16.8567   | 4.47244   |
| LOC100247419              | 103.167  | 17.4036   | 88.8364   |
| LOC104880679              | 0.342213 | 3.3441    | 4.97926   |
| LOC100264475              | 8.70758  | 6.41458   | 0         |

|                           |          |           |          |
|---------------------------|----------|-----------|----------|
| LOC100855242              | 10.379   | 0.898184  | 10.0189  |
| LOC100243923              | 12.5305  | 5.54361   | 23.8842  |
| LOC100266250              | 2.32525  | 6.15489   | 0.320094 |
| LOC100243980              | 0.444956 | 2.44275   | 0.61983  |
| LOC100242337              | 12.4747  | 50.3764   | 11.6126  |
| LOC100268054              | 0.397245 | 1.14602   | 2.60859  |
| LOC100266398              | 7.99662  | 2.05106   | 1.64427  |
| LOC100268134              | 305.01   | 36.4483   | 12.419   |
| LOC100257854              | 75.8507  | 23.9979   | 193.507  |
| LOC100259059              | 0.568499 | 0         | 2.56966  |
| LOC100248934              | 1.18416  | 0.0226838 | 5.22827  |
| LOC100259160              | 0        | 0         | 1.26408  |
| LOC104880688              | 44.6911  | 101.865   | 2.253    |
| LOC104880696              | 109.059  | 70.1232   | 20.8983  |
| LOC100259191              | 10.126   | 43.6263   | 32.0437  |
| LOC100248333              | 5.67119  | 1.39224   | 2.09384  |
| LOC100250237              | 8.3928   | 1.77416   | 2.20229  |
| LOC100260449              | 0.169264 | 0.728913  | 1.7533   |
| LOC104880723              | 2.27599  | 0.0477603 | 0.487652 |
| LOC104880746              | 0.532458 | 3.05495   | 2.13288  |
| LOC104880752              | 0.850136 | 4.23806   | 2.4601   |
| LOC104880753              | 1.56014  | 0.701145  | 3.15223  |
| LOC100855096              | 0.995775 | 4.20145   | 7.31684  |
| LOC104880755              | 1.94726  | 8.66641   | 5.31378  |
| LOC100240983,LOC100244514 | 126.54   | 206.203   | 15.5608  |
| LOC100242716              | 0        | 1.84951   | 0.216681 |
| LOC104880789              | 1.78331  | 15.9804   | 0.321305 |
| LOC100249647              | 9.6135   | 45.8804   | 18.3437  |
| LOC100244496              | 10.1404  | 4.11473   | 2.23879  |
| LOC100254684              | 0.16248  | 0.1102    | 1.16251  |
| LOC100246152              | 0.904137 | 1.82719   | 0.293434 |
| LOC100264996              | 21.5589  | 11.8759   | 0        |
| LOC100259802              | 6.79795  | 9.67123   | 1.00102  |
| LOC100261619,LOC104880799 | 1.30728  | 21.628    | 0.591226 |
| LOC100256520              | 1.29065  | 26.3298   | 0.693551 |
| LOC100266747              | 3.61508  | 28.3924   | 2.65115  |
| LOC100241119              | 2.20875  | 1.50314   | 8.68248  |
| LOC100256515              | 104.54   | 23.0565   | 41.4351  |
| LOC100262576              | 6.09714  | 0.64559   | 6.18952  |
| LOC100264246              | 0.253566 | 0.873227  | 3.42263  |
| LOC100854169              | 0.77086  | 9.83974   | 2.4329   |
| LOC100267688              | 1.85892  | 0.687437  | 3.49338  |
| LOC104880838              | 166.376  | 4.70367   | 109.008  |
| LOC100267696              | 48.3845  | 185.16    | 208.628  |
| LOC104880834              | 0        | 0.766897  | 1.11511  |
| LOC100243728              | 3.17724  | 2.32748   | 0.432965 |
| LOC100266042              | 1.09708  | 4.70404   | 1.7985   |

|                           |           |           |          |
|---------------------------|-----------|-----------|----------|
| LOC100262504,LOC100267662 | 32.584    | 13.1796   | 4.40445  |
| LOC100254091              | 0.501849  | 3.71092   | 2.53425  |
| LOC100267811              | 84.3634   | 14.1323   | 40.866   |
| LOC100248798              | 1.83832   | 4.83108   | 8.81716  |
| LOC104880820              | 9.98066   | 0         | 0        |
| LOC100267709              | 247.724   | 16.8123   | 3.585    |
| LOC100247528              | 42.8736   | 48.6257   | 4.87026  |
| LOC100260852              | 45.509    | 6.33515   | 38.7723  |
| LOC104880818              | 1.36268   | 0.68392   | 2.95321  |
| LOC100242144              | 234.182   | 200.299   | 11.9341  |
| LOC104880813              | 2.06286   | 0.519466  | 2.48927  |
| LOC100261867              | 6.11927   | 0.775538  | 12.0793  |
| LOC100245484              | 0.61761   | 0.165867  | 10.4479  |
| LOC100256773              | 2.30121   | 0         | 1.64665  |
| LOC100251650              | 0.815085  | 0.486922  | 5.49193  |
| LOC104880890              | 0         | 1.29426   | 0        |
| LOC100263637              | 13.9263   | 0.532445  | 0        |
| LOC104880892              | 11.2495   | 1.18343   | 0.356291 |
| LOC100261952              | 2.62882   | 0.768586  | 4.94768  |
| LOC100248315              | 0.8481    | 0.477058  | 4.02679  |
| LOC100244725              | 0.174851  | 0.0993386 | 1.10098  |
| OMT1                      | 0.844091  | 4.5041    | 0.860013 |
| LOC100261846              | 18.0011   | 3.19271   | 9.6268   |
| LOC100246512              | 0.187285  | 2.95354   | 0.795825 |
| LOC100255112              | 16.1993   | 188.583   | 41.3283  |
| LOC100255186              | 0.113365  | 1.47258   | 24.0104  |
| LOC104880901              | 9.72099   | 22.6322   | 1.40111  |
| LOC100252747              | 24.7648   | 3.43544   | 12.7615  |
| LOC100256383              | 5.46366   | 6.02366   | 0.545939 |
| LOC100246003              | 15.8347   | 7.20183   | 0.418693 |
| LOC100256273              | 2.74783   | 8.91532   | 0.865936 |
| LOC100264828              | 4.01813   | 30.1308   | 0.664521 |
| LOC100242538,LOC100252779 | 2.06922   | 14.8701   | 0.529342 |
| LOC100247673              | 0.553516  | 2.9629    | 0.194414 |
| LOC100263064              | 2.26309   | 9.57277   | 1.14335  |
| LOC100240803              | 2.69699   | 8.47666   | 1.96116  |
| LOC100251039              | 2.9117    | 5.18119   | 1.17339  |
| LOC100256196              | 2.50267   | 10.3928   | 1.51539  |
| LOC100261290,LOC100266494 | 2.75355   | 16.1402   | 4.62323  |
| LOC100261380              | 8.1916    | 1.98169   | 5.45772  |
| LOC100247678              | 19.9569   | 0.792064  | 0.316079 |
| LOC100263071              | 2.14847   | 0.305386  | 0.9611   |
| LOC100244934              | 0.0919536 | 1.44995   | 2.50006  |
| LOC100241696              | 0.11056   | 3.86231   | 0.846118 |
| LOC100258706              | 4.23134   | 7.55123   | 19.211   |
| LOC100253830              | 0.23783   | 0.254081  | 2.4691   |
| LOC100265935              | 35.3818   | 0.323386  | 33.6845  |

|                           |          |           |          |
|---------------------------|----------|-----------|----------|
| LOC100257146              | 0.21124  | 1.63672   | 1.07453  |
| LOC100263415              | 0.255763 | 0.461752  | 1.48482  |
| LOC100241143,LOC104881016 | 3.89761  | 7.82835   | 16.7283  |
| LOC100261789              | 4.34739  | 0.311002  | 5.98635  |
| LOC100249723              | 1.52316  | 0.448553  | 2.08694  |
| LOC100254853              | 4.9931   | 9.99873   | 20.0226  |
| LOC100254961              | 0.738951 | 0.502048  | 3.57464  |
| LOC100260054              | 0.497566 | 0.0700822 | 2.30428  |
| LOC100265260              | 1.41524  | 0.370793  | 2.64755  |
| LOC100246341              | 1.45064  | 0         | 0        |
| LOC100253141              | 115.136  | 28.0155   | 47.9173  |
| LOC100242191              | 2.56424  | 12.9872   | 6.34591  |
| LOC100243910              | 1.21346  | 4.53534   | 0.475362 |
| LOC100853267              | 2.35413  | 11.0072   | 5.54489  |
| LOC100855331              | 0.513927 | 4.10578   | 7.87845  |
| LOC100855331              | 0.799482 | 5.83016   | 8.57283  |
| LOC104881042              | 18.4838  | 2.46684   | 10.2183  |
| LOC104881040              | 1.10525  | 0.0951843 | 8.76942  |
| LOC100250636              | 0.21997  | 0.306287  | 1.16007  |
| LOC100243755              | 5.31439  | 1.59806   | 14.7501  |
| LOC104881028              | 8.37598  | 1.77712   | 4.75229  |
| LOC104881026              | 11.7631  | 13.3346   | 0.266393 |
| LOC100260818              | 7.25556  | 3.15096   | 0.485027 |
| LOC104880857              | 0.356488 | 1.69495   | 0.376972 |
| LOC100259242              | 8.05479  | 1.68294   | 75.2094  |
| GST3                      | 18.3811  | 1.48779   | 1.40411  |
| LOC100250574              | 6.24649  | 0.520841  | 3.11161  |
| PSBP1                     | 2083.85  | 494.211   | 1758.18  |
| LOC100262536              | 20.2966  | 0.396921  | 0.589007 |
| LOC100267770              | 16.5782  | 1.03907   | 1.22448  |
| LOC100255766              | 1.71625  | 6.58187   | 1.04609  |
| LOC100260760              | 112.996  | 28.2426   | 101.199  |
| LOC104880830              | 0.802417 | 1.61463   | 7.05068  |
| LOC104880829              | 0        | 1.72915   | 9.45915  |
| LOC100266079              | 1.47231  | 20.1552   | 1.57069  |
| LOC100255665              | 2.49059  | 0.401187  | 0.271459 |
| LOC100266164              | 1.81948  | 0.344553  | 0.429358 |
| LOC100259214              | 12.5182  | 6.93987   | 0.506834 |
| LOC100253888              | 0.427036 | 1.0127    | 7.75784  |
| LOC100264432              | 20.9557  | 0.648837  | 39.8624  |
| LOC100257395              | 3.63208  | 0.760716  | 2.87446  |
| LOC100243748              | 7.68928  | 18.9129   | 0.979112 |
| LOC100248895              | 3.1665   | 0.261031  | 0.990335 |
| LOC100253988              | 34.7883  | 8.18394   | 38.2815  |
| LOC100249958              | 0.472937 | 3.65086   | 1.81128  |
| LOC104880864              | 12.5004  | 0.35483   | 7.77017  |
| LOC100249881              | 92.5853  | 7.67733   | 1.48613  |

|                           |          |          |           |
|---------------------------|----------|----------|-----------|
| LOC100248222              | 1.12692  | 0.950938 | 0.153335  |
| LOC100256762              | 9.19251  | 24.8482  | 6.062     |
| LOC100255020              | 92.4541  | 13.732   | 37.784    |
| LOC100263717              | 23.3015  | 46.5256  | 10.0941   |
| LOC100243092              | 6.60011  | 0.287626 | 1.79104   |
| LOC104880876              | 1.81936  | 0        | 0.0936039 |
| LOC104880877              | 3.37614  | 13.5969  | 12.258    |
| LOC104880899              | 117.912  | 10.3367  | 14.3556   |
| LOC100246598              | 1.53248  | 7.02057  | 2.12348   |
| LOC100243167              | 0.546424 | 3.0884   | 0.237354  |
| LOC100265313              | 30.2876  | 49.6924  | 3.39342   |
| LOC100267196              | 5.60391  | 1.7032   | 1.05854   |
| LOC100256737              | 1.17872  | 0.296962 | 2.67395   |
| LOC100267151              | 20.3436  | 17.5253  | 4.60066   |
| LOC104880910              | 0.496162 | 0.189023 | 2.25639   |
| LOC104880916              | 0        | 0        | 6.97302   |
| LOC100264944              | 0.853493 | 0.19235  | 3.48907   |
| LOC100259620              | 25.5583  | 69.5842  | 11.2164   |
| LOC100249400              | 0.807585 | 0.496633 | 5.30695   |
| LOC100259624              | 0.881691 | 0        | 1.99469   |
| LOC100245876              | 0.205772 | 0.212769 | 2.01644   |
| LOC100853881              | 3.0253   | 5.82778  | 0.698781  |
| LOC100266583              | 2.79491  | 37.0746  | 7.99343   |
| LOC100252786              | 18.0616  | 5.58736  | 2.4841    |
| LOC100254517              | 2.92638  | 0.379817 | 1.87154   |
| LOC104880945              | 3.76685  | 0.941886 | 0.912019  |
| LOC100246878              | 0.31392  | 2.56801  | 0.517727  |
| LOC100267628              | 2.4481   | 0.80371  | 0         |
| LOC100262371              | 0.825249 | 3.30886  | 0.0314943 |
| LOC100250360              | 2.59218  | 2.06453  | 0.409606  |
| LOC100255538              | 1.76885  | 2.90855  | 0.698762  |
| LOC100852631              | 1.53763  | 2.49515  | 0.380987  |
| LOC100265929              | 0.989932 | 0.182738 | 0.18728   |
| LOC100258988              | 0.319867 | 0        | 1.40428   |
| LOC104881018              | 40.6279  | 3.98021  | 4.73553   |
| LOC104880988              | 0        | 0        | 1.36427   |
| LOC100246446              | 0.570788 | 0.288703 | 1.72799   |
| LOC104877322              | 0.50275  | 4.03036  | 0.739329  |
| LOC100249813,LOC100251590 | 0.673771 | 5.5831   | 0.408896  |
| LOC100253218              | 2.73556  | 3.60962  | 0.678376  |
| LOC100246346,LOC100256081 | 6.4187   | 3.79007  | 19.8316   |
| LOC104881052              | 1.75849  | 1.5824   | 38.2538   |
| LOC100855076              | 3.6276   | 4.10101  | 36.9169   |
| LOC100255940,LOC104881076 | 0.109476 | 0.531013 | 5.76566   |
| LOC100855331              | 0.670013 | 10.3506  | 10.1852   |
| LOC100852459              | 6.78748  | 3.83047  | 26.6741   |
| LOC104881068              | 6.79168  | 0        | 0         |

|                                        |           |           |           |
|----------------------------------------|-----------|-----------|-----------|
| LOC100855087,LOC104881036,LOC104881063 | 26.5506   | 0.477316  | 11.7059   |
| LOC104881067                           | 0.956444  | 0.522054  | 3.39513   |
| LOC104881029                           | 0.955977  | 5.01737   | 0.622337  |
| LOC100243669                           | 4.64187   | 1.57273   | 0.104628  |
| LOC100267686                           | 7.54644   | 3.8282    | 38.1535   |
| LOC100257402                           | 1.88221   | 0         | 0.0667175 |
| LOC100253526                           | 11.7762   | 70.3442   | 13.3405   |
| LOC100248420                           | 0.561025  | 2.7087    | 0.923922  |
| LOC100246707                           | 245.267   | 341.091   | 54.9909   |
| LOC100253544                           | 17.0022   | 2.89527   | 20.8389   |
| LOC100257059                           | 50.3651   | 1.14445   | 1.04219   |
| LOC100246797                           | 38.7058   | 141.356   | 15.338    |
| LOC100853941                           | 6.82077   | 4.67529   | 0.670335  |
| LOC100244917                           | 116.341   | 55.5949   | 250.196   |
| LOC100246693                           | 1.40605   | 5.39276   | 1.15651   |
| LOC100263918                           | 1.90242   | 2.24655   | 0.541665  |
| LOC100261614                           | 0.231087  | 0.153072  | 1.26967   |
| LOC100261486                           | 29.3137   | 157.269   | 78.7676   |
| LOC104881141                           | 0.0722995 | 1.13116   | 0         |
| LOC104881137                           | 0.130921  | 2.79054   | 0.33661   |
| LOC100259872                           | 0.169158  | 6.43423   | 0.300827  |
| LOC104881136                           | 2.92659   | 38.309    | 1.42822   |
| LOC104881135                           | 0.622677  | 8.5757    | 0.307298  |
| LOC104881134                           | 0.306969  | 3.25256   | 0.392956  |
| LOC100264982                           | 1.17119   | 4.39382   | 1.0742    |
| LOC100265103                           | 34.2245   | 6.03217   | 2.50243   |
| LOC100247958                           | 66.6468   | 29.1902   | 12.26     |
| LOC100246196                           | 4.33808   | 18.1945   | 12.2107   |
| LOC100854685                           | 2.72486   | 0         | 0.516747  |
| LOC100244500                           | 3.39384   | 1.4797    | 0.807962  |
| LOC100265108                           | 3.64879   | 0.290297  | 0         |
| LOC100263355                           | 23.2245   | 5.90062   | 3.11808   |
| LOC104881156                           | 2.81063   | 0.605903  | 1.00156   |
| LOC100260169                           | 348.547   | 83.9925   | 322.8     |
| LOC100855208                           | 7.94994   | 0.175816  | 0         |
| LOC100256543                           | 3.21835   | 0.33258   | 0.0940722 |
| MLO7                                   | 1.81291   | 1.74222   | 9.43351   |
| LOC100263275                           | 1054.2    | 260.04    | 853.828   |
| LOC100246181,LOC100266758              | 7.22843   | 3.72302   | 62.4668   |
| LOC104881109                           | 0.659316  | 2.94718   | 0.881349  |
| LOC100242107                           | 0.535373  | 0.0391833 | 2.88943   |
| LOC100854584                           | 0.171878  | 1.37354   | 0         |
| LOC100266039                           | 3.76484   | 0.67158   | 6.4059    |
| LOC100253963                           | 1.77052   | 1.29367   | 0         |
| LOC100241991                           | 2.61545   | 0.589445  | 0.111414  |
| LOC100260232                           | 14.2873   | 1.26193   | 13.8077   |
| LOC100248168                           | 5.23389   | 0.468023  | 0.997641  |



|                                        |           |           |          |
|----------------------------------------|-----------|-----------|----------|
| LOC104881217                           | 0.442391  | 1.72698   | 0        |
| LOC100247150                           | 8.53086   | 25.6954   | 34.9762  |
| LOC100252264                           | 2.70302   | 0.331642  | 0.261797 |
| LOC100262623                           | 3.96826   | 11.1327   | 0.415235 |
| LOC100259226                           | 6.60657   | 1.57493   | 4.65097  |
| LOC100265310                           | 3.69094   | 0         | 0        |
| LOC100855152                           | 0.505628  | 0.153946  | 9.3046   |
| LOC100248982                           | 0.544451  | 0.214462  | 9.01446  |
| LOC100267771                           | 0.276037  | 12.955    | 0.914758 |
| LOC100247224                           | 2.10986   | 0.590593  | 3.16076  |
| LOC100244656                           | 1.3157    | 1.85884   | 0.392889 |
| LOC100853082                           | 2.92359   | 0.458247  | 3.04827  |
| LOC100253197                           | 3.00322   | 1.50007   | 7.10315  |
| LOC100243146                           | 0.876628  | 1.81372   | 0        |
| LOC100853803                           | 3.05151   | 16.2978   | 7.85129  |
| LOC100251598                           | 2.81293   | 31.6294   | 12.2491  |
| LOC100246453,LOC100253376              | 0.861622  | 7.7407    | 1.60203  |
| LOC100241325                           | 0.606109  | 7.18283   | 1.24798  |
| LOC100241493                           | 11.5265   | 0.165431  | 4.938    |
| LOC100256794                           | 3.04756   | 0.0887637 | 0.476316 |
| LOC100249903                           | 40.2754   | 8.53127   | 39.9831  |
| LOC100256787                           | 7.53181   | 1.69102   | 3.46063  |
| LOC100852428                           | 132.492   | 228.894   | 27.5969  |
| LOC100853504                           | 25.1294   | 4.88868   | 11.7343  |
| LOC100257867                           | 0.899062  | 2.47363   | 0.142201 |
| LOC100252934                           | 0.179896  | 0.3838    | 1.41667  |
| LOC100261425                           | 0.20039   | 0.46426   | 6.22     |
| LOC100266629                           | 1.30735   | 1.65765   | 18.3282  |
| LOC104881346                           | 0.730089  | 1.39475   | 80.2105  |
| LOC100249452,LOC100264857,LOC100853465 | 11.0871   | 6.45004   | 34.583   |
| LOC104881343                           | 23.2513   | 12.727    | 0.769157 |
| LOC100254566                           | 2.65735   | 6.30412   | 0.936329 |
| LOC100255226                           | 110.21    | 46.0538   | 8.0196   |
| LOC100257064                           | 28.105    | 49.9287   | 6.17272  |
| LOC100267220                           | 0.0173015 | 10.7587   | 0        |
| LOC100256965                           | 0.4839    | 7.15723   | 9.8963   |
| LOC100267216                           | 9.18671   | 19.144    | 3.26252  |
| LOC100263817                           | 28.3264   | 5.89383   | 7.5639   |
| LOC100241651                           | 198.972   | 9.71482   | 113.658  |
| LOC104881086                           | 10.5999   | 29.0105   | 2.94162  |
| LOC100258754                           | 39.6023   | 47.278    | 10.5095  |
| LOC100854814                           | 5.51764   | 0.533406  | 1.02112  |
| LOC104881144                           | 0.227454  | 0.904942  | 2.02286  |
| LOC100854071                           | 54.4263   | 100.126   | 6.80671  |
| LOC100256404                           | 61.2053   | 51.097    | 13.4376  |
| LOC100266698                           | 341.755   | 2.13909   | 66.5034  |
| LOC100241084                           | 46.7134   | 2.71659   | 36.0552  |

|                           |          |          |           |
|---------------------------|----------|----------|-----------|
| LOC100246108              | 1.19659  | 28.9065  | 3.62908   |
| LOC100261497              | 11.7393  | 1.64422  | 1.43083   |
| LOC100249533              | 17.2091  | 9.6586   | 3.77635   |
| LOC100242821              | 13.8347  | 2.17364  | 1.1079    |
| LOC100249578              | 2.34264  | 1.82354  | 0.572373  |
| LOC100251340              | 2.27815  | 0.39974  | 0.535778  |
| LOC100253055              | 0.216293 | 1.75468  | 0.61068   |
| LOC100259813              | 9.76442  | 1.42137  | 3.8416    |
| LOC100259822              | 0.463927 | 1.05655  | 0.130209  |
| LOC100266711              | 8.41139  | 39.5989  | 17.1145   |
| LOC100262621              | 2.10939  | 0.088399 | 0         |
| LOC100250575              | 2.47426  | 3.57344  | 13.8127   |
| LOC100255773              | 28.5749  | 9.45946  | 6.14932   |
| LOC100253970              | 9.04253  | 1.98479  | 4.62134   |
| LOC100259107              | 0.946064 | 0.107513 | 1.80193   |
| LOC100264279              | 5.43995  | 0.321732 | 6.97292   |
| LOC100241998              | 6.10133  | 68.9968  | 28.7221   |
| LOC100248872              | 2.67118  | 0.952472 | 0.374575  |
| LOC104881190              | 4.70558  | 0        | 0         |
| LOC100245348              | 0.654785 | 6.1797   | 2.95782   |
| LOC100254093              | 1.57353  | 0.803781 | 0.0977471 |
| LOC104881195              | 0.321476 | 8.39496  | 0.682189  |
| LOC100246459              | 5.0858   | 0        | 2.79332   |
| LOC104881206              | 0.553231 | 0        | 1.28238   |
| LOC104881198              | 0        | 0        | 3.25466   |
| LOC104881207              | 0        | 0        | 1.44063   |
| LOC100260238              | 71.5838  | 8.72552  | 40.4158   |
| LOC100256901              | 3.88983  | 0.106895 | 0.374558  |
| LOC100244619              | 2.08776  | 0.210057 | 0.0712614 |
| LOC100252974              | 4.72184  | 0        | 8.5604    |
| LOC100259102              | 2.34991  | 8.89595  | 12.0151   |
| LOC100241994              | 0.315183 | 1.33735  | 0.548411  |
| LOC100247143              | 1.85444  | 0.259352 | 18.7027   |
| LOC100854575              | 1.27524  | 0.248972 | 0.306102  |
| LOC104881251              | 2.20704  | 0.362788 | 0.619916  |
| LOC100852853,LOC104881237 | 5.52765  | 1.17923  | 1.6806    |
| LOC100854210              | 3.21627  | 0.588278 | 2.6018    |
| LOC100253935,LOC100260928 | 5.45967  | 0.201433 | 0.516502  |
| LOC104881267              | 0.626813 | 1.272    | 3.19401   |
| LOC100267657              | 3.96561  | 1.05529  | 10.03     |
| LOC104881259              | 0.521198 | 0.302701 | 2.51316   |
| LOC100264272              | 154.603  | 16.6136  | 156.064   |
| LOC104881258              | 0.873995 | 1.11224  | 0         |
| LOC100248873              | 18.5305  | 78.9756  | 31.6771   |
| LOC100854267              | 54.2365  | 9.16701  | 0.256014  |
| LOC100241434              | 0.662316 | 5.04856  | 1.23752   |
| LOC100256686              | 0.331612 | 2.59744  | 0.214288  |

|                                        |          |           |           |
|----------------------------------------|----------|-----------|-----------|
| LOC104881300                           | 42.22    | 35.5814   | 2.38302   |
| LOC104881295                           | 0        | 2.12879   | 0         |
| LOC104881339                           | 2.33574  | 0.452464  | 0.178542  |
| LOC100263758                           | 8.34367  | 0.37579   | 6.43168   |
| LOC100267144                           | 0.445424 | 16.6684   | 0.701785  |
| LOC100257979                           | 1.15542  | 0.227027  | 0.474188  |
| LOC100254576                           | 0.967972 | 0         | 0.21489   |
| LOC104881306                           | 0.21154  | 0.566268  | 1.10176   |
| LOC100259574                           | 18.082   | 0.821422  | 0.0501956 |
| LOC100264732                           | 10.0966  | 18.6192   | 45.0969   |
| LOC100247598                           | 0.493126 | 4.43183   | 0.212046  |
| LOC100244286                           | 90.2552  | 336.464   | 9.86603   |
| LOC100261320                           | 0.993144 | 1.57455   | 0.338714  |
| LOC100242579                           | 17.9342  | 1.74919   | 1.65817   |
| LOC100264808                           | 0.260421 | 3.83214   | 0.285032  |
| LOC100256170                           | 3.8902   | 15.9714   | 6.63408   |
| LOC100240751                           | 0.804904 | 0         | 1.39581   |
| LOC100261443                           | 0.767044 | 12.5793   | 1.71171   |
| LOC100244147,LOC100852568,LOC104881450 | 7.67527  | 48.2003   | 15.6838   |
| LOC104881443                           | 4.36174  | 0.470058  | 6.14337   |
| LOC104881427                           | 2.59074  | 0.278881  | 0.119973  |
| LOC104881428                           | 38.9868  | 242.18    | 0         |
| LOC100255573                           | 0.848465 | 5.81941   | 0.660293  |
| LOC100262285                           | 1.93966  | 0.976752  | 4.53881   |
| LOC100854804                           | 40.5244  | 13.9452   | 65.5539   |
| LOC100854639                           | 4.46569  | 2.05561   | 9.63339   |
| LOC100267439                           | 3.57596  | 1.20666   | 26.7952   |
| LOC104881411                           | 2.52036  | 0.854553  | 3.91705   |
| LOC100260476                           | 65.6331  | 72.7944   | 13.1826   |
| LOC100245098                           | 0.559981 | 1.56848   | 0.230266  |
| LOC100260366                           | 1.6232   | 6.69234   | 2.21635   |
| LOC104881521                           | 1.3765   | 0.57897   | 16.5589   |
| LOC104881494                           | 0.800566 | 1.12348   | 5.36145   |
| LOC104881517                           | 2.09236  | 1.00147   | 0.395127  |
| LOC104881513                           | 4.22947  | 10.4363   | 0.636207  |
| LOC100240893                           | 2.41073  | 15.194    | 1.26707   |
| LOC104881511                           | 2.67234  | 5.96007   | 0.717497  |
| LOC100242523                           | 2.96379  | 13.6403   | 3.19748   |
| LOC100249700                           | 2.27163  | 13.3758   | 1.30608   |
| LOC104881539                           | 0.992828 | 0         | 0.327001  |
| LOC104881585                           | 0        | 1.21854   | 3.67615   |
| MYBA7                                  | 0.681869 | 4.32365   | 4.06786   |
| LOC100248383                           | 5.05207  | 62.0543   | 17.451    |
| LOC104881548                           | 3.72109  | 0         | 1.33419   |
| LOC100246645                           | 3.30195  | 0.659294  | 0         |
| LOC100251383                           | 0.199947 | 0.0852125 | 1.10518   |
| LOC100854072                           | 141.441  | 70.909    | 19.6438   |

|                           |           |          |           |
|---------------------------|-----------|----------|-----------|
| LOC100241191              | 0.386766  | 1.60814  | 1.08667   |
| LOC100263546              | 0.469571  | 0.341523 | 1.42035   |
| LOC100246414              | 3.20593   | 14.5811  | 3.28605   |
| LOC100261743              | 1.85815   | 7.85468  | 0.36214   |
| LOC100263434              | 0         | 1.97257  | 0         |
| LOC104881610              | 0         | 2.52773  | 0.0189996 |
| LOC100248114              | 72.9992   | 3.62302  | 30.764    |
| LOC100244586              | 45.6115   | 15.5667  | 9.66686   |
| LOC100244676              | 10.3913   | 6.84556  | 1.51825   |
| LOC100263492              | 9.7176    | 2.02086  | 4.73055   |
| LOC100249844              | 2.02813   | 7.3779   | 51.2745   |
| LOC100242976              | 2.21453   | 17.0496  | 2.48169   |
| LOC100263446              | 9.93296   | 0.421676 | 0         |
| LOC100253230              | 0.200373  | 1.65746  | 0.971762  |
| LOC100245521              | 1.17158   | 11.7976  | 7.55316   |
| LOC100855333              | 0.153468  | 0.9735   | 0.249472  |
| LOC100855369              | 0.12443   | 1.01914  | 0.52466   |
| LOC100249110              | 8.07231   | 0.631555 | 0.951044  |
| PEL                       | 2.86917   | 10.6278  | 1.47928   |
| LOC100245690              | 0.757664  | 7.89537  | 10.5365   |
| LOC100243977              | 39.5686   | 5.12096  | 4.18324   |
| LOC100243933              | 0.194596  | 3.82306  | 0.486391  |
| LOC100852430              | 1.35014   | 7.57653  | 7.79195   |
| LOC100852579,LOC104881666 | 0.909171  | 6.18493  | 9.58744   |
| LOC100249137              | 825.922   | 99.3813  | 662.661   |
| LOC100264470              | 1.1365    | 0.238963 | 0.104467  |
| LOC100264674              | 5.6775    | 23.3309  | 17.6966   |
| LOC100262833              | 18.8804   | 4.63509  | 25.0196   |
| LOC100249226              | 1.10442   | 4.43006  | 1.31309   |
| LOC100244055              | 1.40436   | 46.0591  | 14.3067   |
| LOC100266391              | 0.375828  | 43.34    | 12.9544   |
| LOC104881677              | 0.149709  | 29.9535  | 3.35182   |
| LOC100243965              | 31.1725   | 93.0911  | 2.7053    |
| LOC100261014              | 5.81188   | 30.7688  | 5.30245   |
| LOC100256158              | 5.56206   | 10.7375  | 2.2296    |
| LOC100256076              | 0.582738  | 0.176643 | 2.41941   |
| LOC100254372              | 23.7711   | 3.10243  | 17.1005   |
| LOC100249271              | 22.1664   | 35.1936  | 6.04572   |
| LOC100250998              | 12.9845   | 0.890077 | 8.02915   |
| LOC100254290              | 2.94558   | 13.6223  | 2.57997   |
| LOC100252475              | 16.7297   | 82.8801  | 10.4344   |
| LOC100261075              | 86.49     | 6.56131  | 39.0249   |
| LOC100268024              | 43.9817   | 12.3168  | 51.8237   |
| LOC104881396              | 0.0708429 | 6.71526  | 0.660752  |
| LOC100249324              | 2.77548   | 0.869174 | 0.521763  |
| LOC100258017              | 33.6028   | 1.31635  | 12.9053   |
| LOC100258047              | 5.11416   | 0.684766 | 0         |

|                                        |           |          |          |
|----------------------------------------|-----------|----------|----------|
| LOC104881378                           | 1.09647   | 0        | 0.382664 |
| LOC100247676                           | 1.77234   | 0.917106 | 0.189771 |
| LOC100854480,LOC104881462              | 0.628543  | 18.0824  | 1.1462   |
| LOC100253784                           | 0.726164  | 4.06826  | 2.63507  |
| LOC100854088                           | 1.32093   | 4.76336  | 5.4769   |
| LOC100245278,LOC104881445              | 1.08864   | 19.9965  | 5.18234  |
| LOC100247058                           | 3.36404   | 0.584701 | 0.672588 |
| LOC100247065                           | 0.853487  | 0.458492 | 2.3043   |
| LOC100241932                           | 1.31191   | 0.147496 | 0.348395 |
| LOC100243536                           | 10.7218   | 166.987  | 41.6902  |
| LOC100248678                           | 1.17526   | 92.7101  | 33.0637  |
| LOC104881433                           | 13.9822   | 2.52413  | 22.0199  |
| LOC104881430                           | 1.62351   | 9.9532   | 0.60882  |
| LOC100246921,LOC104881424              | 3.69145   | 13.6103  | 3.12827  |
| LOC100243526,LOC100248669              | 28.8249   | 17.782   | 72.4024  |
| LOC100265584                           | 0.651175  | 0.152931 | 1.20705  |
| LOC100253509                           | 0.244526  | 1.96653  | 0.929315 |
| LOC100267205                           | 0.283731  | 37.8433  | 6.16957  |
| LOC104881474                           | 0.808756  | 0        | 2.30115  |
| LOC104881473                           | 1.13129   | 0.132733 | 2.84011  |
| LOC100246029,LOC104881525,LOC104881527 | 7.34351   | 1.4573   | 69.9907  |
| LOC100263070,LOC104881503              | 17.4842   | 17.4353  | 71.1865  |
| LOC104881519                           | 4.69513   | 0.273769 | 0.685493 |
| LOC104881492                           | 0.958951  | 5.21583  | 2.21558  |
| LOC104881490                           | 0.65296   | 2.35201  | 3.33698  |
| LOC104881510                           | 0         | 0.246099 | 2.94443  |
| LOC100263537                           | 15.0146   | 21.8543  | 3.42229  |
| LOC100265304                           | 2.34664   | 5.68605  | 1.27671  |
| LOC104881536                           | 0         | 0        | 2.69757  |
| LOC100251878                           | 8.43471   | 2.06802  | 12.4827  |
| LOC104881542                           | 0         | 0.292358 | 2.71296  |
| LOC100265534                           | 93.3128   | 400.513  | 163.196  |
| LOC100253496                           | 33.1505   | 71.8656  | 15.1477  |
| LOC100251783                           | 3.27111   | 21.9208  | 10.224   |
| LOC100253584,LOC104881595              | 1.2025    | 17.4751  | 0.806063 |
| LOC100258732                           | 3.02162   | 2.3221   | 0.639958 |
| LOC104881562                           | 0.736286  | 0.616718 | 3.96465  |
| LOC104881600                           | 0         | 0.240685 | 1.084    |
| LOC100241294                           | 0.53576   | 0.151342 | 1.13571  |
| LOC100854949                           | 4.87497   | 72.9726  | 14.6577  |
| LOC104881611                           | 2.73419   | 0.350868 | 1.71061  |
| LOC100852538                           | 0.100888  | 0        | 0.917807 |
| LOC104881613                           | 0.213218  | 5.27989  | 1.51991  |
| LOC100265244                           | 0.0315743 | 1.94122  | 0.197941 |
| LOC100254855                           | 15.4355   | 102.01   | 60.5959  |
| VFUL-L                                 | 1.05987   | 3.30829  | 0.683139 |
| LOC100246444                           | 10.9942   | 12.3072  | 1.07672  |

|                           |          |           |          |
|---------------------------|----------|-----------|----------|
| LOC100855368              | 3.30855  | 308.821   | 0.950486 |
| LOC100253142              | 14.3651  | 2.62196   | 2.61687  |
| LOC100253147              | 1.9007   | 8.26279   | 1.6297   |
| LOC100256653              | 42.9457  | 93.5387   | 18.0435  |
| LOC100259977              | 1.07418  | 1.76897   | 0.238715 |
| LOC104881661              | 5.18342  | 0.69683   | 1.5616   |
| LOC100268167              | 5.38601  | 0.0514219 | 6.89902  |
| LOC100242394              | 5.91966  | 1.25658   | 6.40386  |
| LOC100254180              | 0.271613 | 1.18354   | 0.573539 |
| LOC100853271              | 1.29633  | 0.911699  | 0.174149 |
| LOC100252565              | 2.59341  | 0.428412  | 1.01936  |
| LOC100266380              | 25.1022  | 36.0467   | 5.97045  |
| LOC100261167              | 66.6443  | 97.3051   | 21.415   |
| LOC100256082              | 0.187918 | 2.53587   | 0.275094 |
| LOC104881686              | 1.01727  | 2.90357   | 0.372398 |
| LOC100242238              | 10.6947  | 0.321246  | 0.669326 |
| LOC100255991              | 12.9435  | 1.68191   | 0.169848 |
| LOC100854052              | 1.6212   | 0.259115  | 0.938965 |
| LOC100854089,LOC104881697 | 0.347328 | 0.570977  | 1.84612  |
| LOC100854125              | 1.13537  | 0.0363079 | 0        |
| LOC104881698              | 0.906849 | 4.91145   | 7.09165  |
| LOC100257462              | 3.12536  | 0.492083  | 0.187356 |
| LOC100242017              | 1.85273  | 7.56183   | 0.570213 |
| LOC104881751              | 0        | 6.96927   | 0        |
| LOC100260757              | 2.14573  | 6.82177   | 1.10806  |
| LOC104881723              | 1.1052   | 3.62824   | 10.1972  |
| LOC100247140              | 0.623719 | 6.68741   | 2.33159  |
| LOC104881716              | 1.47824  | 0.337858  | 0.547796 |
| LOC100265532              | 3.36966  | 7.81304   | 25.7849  |
| LOC100250170              | 1.16619  | 0.887004  | 0.160327 |
| LOC100854387              | 1.93781  | 4.90945   | 0.31671  |
| LOC100241453              | 0.119949 | 1.33374   | 0.100968 |
| LOC100257290              | 3.59527  | 0.508725  | 0.84192  |
| LOC100257309              | 0.132811 | 30.8945   | 0.348326 |
| LOC100258927              | 1.16837  | 0         | 0.413794 |
| LOC100265340              | 1.235    | 0         | 0.17068  |
| LOC104881776              | 0.179708 | 0         | 7.26585  |
| LOC100854413              | 6.23561  | 0.465584  | 0.343053 |
| LOC104881836              | 5.43911  | 0.331978  | 0.238813 |
| LOC100261547              | 0.28894  | 2.77416   | 0.530634 |
| LOC100264971              | 0.575795 | 16.3882   | 4.91469  |
| LOC100253104              | 0.345021 | 1.14778   | 0.141616 |
| LOC100254811              | 0.918021 | 8.34684   | 1.27764  |
| LOC104881878              | 0        | 37.9073   | 5.57525  |
| LOC100251335              | 51019.5  | 2.1118    | 3.32577  |
| LOC100255703              | 1.44978  | 1.72004   | 5.88148  |
| LOC100242001              | 0.970681 | 6.0497    | 1.10747  |

|                           |           |          |          |
|---------------------------|-----------|----------|----------|
| LOC100257393              | 0.570043  | 4.61339  | 0.829404 |
| LOC100264301              | 0.0634248 | 0.225054 | 6.84423  |
| LOC100247268              | 23.2656   | 55.4047  | 10.2326  |
| LOC100252386              | 33.4687   | 144.31   | 24.2922  |
| LOC100262652              | 0.888649  | 15.732   | 0.888555 |
| LOC104881856              | 16.8192   | 84.1991  | 6.48728  |
| LOC104881857,LOC104881858 | 3.58352   | 34.0078  | 2.73544  |
| LOC100262563              | 10.1805   | 33.9661  | 0.176553 |
| LOC100255716              | 2.37411   | 7.08189  | 0.716297 |
| LOC100260763              | 14.2279   | 0.463796 | 0.998745 |
| LOC100243677              | 44.4065   | 1.81716  | 29.8916  |
| LOC104881853              | 0.815205  | 0.497474 | 2.46052  |
| LOC100245524              | 83.7355   | 2.34686  | 10.5153  |
| LOC100260458              | 38.3579   | 0.502784 | 0.204336 |
| LOC100248474              | 19.8429   | 1.01774  | 2.41171  |
| LOC100241611              | 1.9066    | 0.172586 | 0        |
| LOC100852737              | 0.630005  | 4.42508  | 0.864387 |
| LOC104881934              | 1.6481    | 0        | 0        |
| LOC104881933              | 3.70853   | 0        | 0        |
| LOC104881932              | 1.81215   | 0        | 0        |
| LOC100263619              | 42.3919   | 101.945  | 19.8247  |
| LOC100251711              | 8.58742   | 46.3748  | 7.68331  |
| LOC100246456,LOC100267119 | 0.769212  | 16.6206  | 5.9367   |
| LOC100249910              | 1.10763   | 3.9556   | 0.706143 |
| LOC100251716              | 3.7455    | 1.46879  | 0.906915 |
| LOC100258459              | 8.05832   | 0.249341 | 0.182207 |
| LOC100241460              | 82.2522   | 206.547  | 48.0535  |
| LOC104881911              | 0.0302032 | 0        | 5.83233  |
| LOC100253419              | 2.35223   | 0.559237 | 1.39636  |
| LOC100854219              | 7.9291    | 12.6479  | 1.87964  |
| LOC100255094              | 8.10191   | 11.88    | 0.675157 |
| LOC100245433              | 1.31299   | 7.81861  | 0.290307 |
| LOC100248851              | 15.2856   | 0.385545 | 2.92415  |
| LOC104881718              | 4.57027   | 0        | 7.94178  |
| LOC104881717              | 8.86106   | 0.738091 | 27.8387  |
| LOC100258566              | 0         | 5.41067  | 0.946705 |
| LOC100253428              | 2.7057    | 0.98711  | 0.387326 |
| LOC100260317              | 4.00258   | 0.246    | 0.745186 |
| LOC104881752              | 2.29246   | 17.5872  | 9.57183  |
| LOC100253424              | 4.23731   | 0.712205 | 0.230608 |
| LOC104881757              | 1.38356   | 0.213766 | 0        |
| LOC100245933              | 0.187608  | 1.23377  | 3.7599   |
| LOC100256860              | 0.0253724 | 1.47603  | 0.302324 |
| LOC104881778              | 1.30009   | 0        | 0.198229 |
| LOC100251741              | 0.487031  | 2.77108  | 2.54535  |
| LOC100252221              | 16.8495   | 0.668011 | 1.24435  |
| LOC104881844              | 645.756   | 0.765001 | 0.115797 |

|                           |           |           |           |
|---------------------------|-----------|-----------|-----------|
| LOC104881842              | 13.8856   | 0.20141   | 0         |
| LOC104881829              | 0         | 1.67699   | 1.64774   |
| LOC104881827              | 0         | 0         | 1.40529   |
| LOC104881825              | 0.430665  | 0         | 1.96359   |
| LOC100256452              | 1.83905   | 9.44281   | 3.61077   |
| LOC100258179              | 2.41961   | 35.7287   | 26.8455   |
| LOC100251342              | 0.319855  | 7.84055   | 2.7584    |
| LOC100249535              | 0.794296  | 5.87049   | 1.06741   |
| LOC104881876              | 0.0164667 | 7.57169   | 0.792358  |
| LOC100242041              | 9.9595    | 51.2831   | 7.00511   |
| LOC100255668              | 5.37034   | 1.34905   | 21.2949   |
| LOC100264407              | 4.70549   | 0         | 0.146402  |
| LOC100242120              | 0.947496  | 6.36063   | 5.83348   |
| LOC100252376              | 3.32871   | 0.7351    | 1.14049   |
| LOC100259121              | 0.761097  | 0         | 3.09039   |
| LOC100267685              | 0.612706  | 0         | 4.29954   |
| LOC100245370              | 0.183222  | 0.123317  | 2.6602    |
| LOC100259039              | 30.9441   | 6.12466   | 92.2537   |
| LOC104881870              | 2.53512   | 0         | 7.56461   |
| LOC100248930              | 30.4327   | 55.4586   | 3.12393   |
| LOC100250535              | 336.919   | 11.3308   | 249.683   |
| LOC104881847              | 1.4533    | 7.9068    | 1.1622    |
| LOC100256846              | 4.55581   | 0.97694   | 2.02712   |
| LOC100255055              | 4.77224   | 59.3875   | 9.74211   |
| LOC100263714              | 1.29369   | 0         | 0         |
| LOC100241458              | 94.959    | 98.4062   | 13.2812   |
| LOC100253410              | 0.71304   | 4.21023   | 0.592918  |
| LOC100249927              | 2.70809   | 0.0431037 | 0.0858185 |
| LOC100258465,LOC100263608 | 12.8758   | 0.523407  | 0.501694  |
| LOC104881946              | 2.49635   | 0.879655  | 0.474303  |
| LOC100243097              | 34.6824   | 23.094    | 197.243   |
| LOC104881941              | 2.40083   | 0.386827  | 0.706812  |
| LOC100261474              | 20.3711   | 4.29737   | 20.7499   |
| LOC100264821              | 62.3565   | 12.2557   | 42.2127   |
| LOC100240884              | 41.524    | 7.83288   | 82.5053   |
| LOC100242527              | 13.8322   | 9.0131    | 1.2291    |
| LOC100244326              | 0.52466   | 0.180082  | 2.14485   |
| LOC104882010              | 0.216874  | 0.0861104 | 7.26374   |
| LOC104881983              | 2.16392   | 0.318059  | 0.749563  |
| LOC104881990              | 0         | 1.37101   | 0.424363  |
| LOC104882036              | 0         | 4.25176   | 1.72425   |
| LOC100256282              | 5.15159   | 58.7354   | 2.79088   |
| LOC100853363              | 3.85844   | 20.8091   | 1.0726    |
| LOC100247763              | 12.3713   | 47.9973   | 3.9949    |
| LOC100242632              | 12.5454   | 45.5197   | 2.48283   |
| LOC100259725,LOC100264915 | 7.60262   | 27.8701   | 2.80201   |
| LOC100254616              | 28.4552   | 17.4259   | 2.6051    |



|                           |           |           |           |
|---------------------------|-----------|-----------|-----------|
| LOC100249507              | 12.4221   | 53.5883   | 1.93224   |
| LOC100261260              | 8.79271   | 23.8757   | 0.880219  |
| LOC100252757,LOC100263042 | 30.9221   | 75.2541   | 3.09247   |
| LOC104882076              | 0.227402  | 4.28156   | 3.72036   |
| LOC100249206              | 0.511017  | 0.277209  | 1.5606    |
| LOC100254297,LOC104882087 | 3.39757   | 26.323    | 4.16845   |
| HT4                       | 16.4513   | 4.01796   | 11.4895   |
| LOC104882052              | 6.31915   | 44.4026   | 1.44821   |
| LOC100257357              | 42.7037   | 0         | 0         |
| LOC100853317              | 0.629154  | 3.99154   | 0.198351  |
| LOC100257268              | 1.25698   | 8.59594   | 3.82202   |
| LOC100246573              | 5.20082   | 1.16656   | 2.42316   |
| LOC100246778,LOC100854926 | 8.18633   | 1.89747   | 11.9985   |
| LOC100253626              | 1.60661   | 0.673007  | 14.4326   |
| LOC104877413              | 0.856579  | 0.622106  | 7.30439   |
| LOC104882119              | 2.13836   | 20.1109   | 3.97922   |
| LOC100254147              | 0.550314  | 0.122098  | 1.01494   |
| LOC100263570              | 6.27954   | 1.59832   | 17.3641   |
| LOC100249725              | 2.12602   | 9.34232   | 5.92419   |
| LOC100256085              | 0.22192   | 3.06074   | 0.274971  |
| LOC100252397              | 1.93005   | 0         | 0         |
| LOC100262428,LOC104882160 | 0.0619644 | 2.85375   | 0.222525  |
| LOC100267477              | 0.250856  | 2.742     | 0.724083  |
| LOC100241934              | 0.27295   | 6.42265   | 2.5724    |
| LOC100245181              | 0.177521  | 0.296012  | 1.45981   |
| LOC100250301              | 0.255243  | 0.482578  | 6.2707    |
| LOC100264844              | 0         | 0.104909  | 1.16376   |
| LOC100242903              | 0         | 0.0881052 | 1.31654   |
| LOC100253919              | 2.15046   | 1.02771   | 4.78394   |
| LOC100245414              | 4.57295   | 0.175961  | 2.41322   |
| LOC100257448              | 0.726178  | 0.0254785 | 3.53392   |
| LOC100264341              | 2.41971   | 0.596297  | 1.17345   |
| LOC100252463              | 27.875    | 2.29908   | 23.2506   |
| LOC100242214              | 18.1442   | 8.79422   | 50.9941   |
| LOC100261205              | 6.70501   | 0         | 14.9787   |
| LOC100247478,LOC100854849 | 3.23915   | 21.8453   | 2.20806   |
| LOC100254334              | 30.874    | 69.5007   | 14.1317   |
| LOC100252599              | 254.441   | 421.205   | 65.84     |
| LOC104882216              | 2.48475   | 5.99661   | 1.46577   |
| LOC100247310              | 14.0727   | 4.65848   | 0.668135  |
| LOC100250976              | 1.61108   | 0.883777  | 9.7828    |
| LOC100242322              | 64.0519   | 6.40198   | 16.4697   |
| LOC104882182              | 0.0336784 | 1.78285   | 0.212418  |
| LOC100243904              | 1.91865   | 0.0265053 | 0.0942843 |
| LOC104882179              | 0.411966  | 3.0265    | 7.137     |
| LOC100254307              | 1.0538    | 2.04489   | 4.57343   |
| LOC100262816              | 0.662571  | 1.34983   | 4.79265   |

|                                        |          |           |          |
|----------------------------------------|----------|-----------|----------|
| LOC100247451                           | 1.06366  | 4.73648   | 3.21874  |
| LOC100250120                           | 62.1962  | 15.168    | 50.2825  |
| LOC100854640                           | 1.64307  | 1.04213   | 20.4803  |
| LOC100854577                           | 0.27176  | 0.759724  | 2.58763  |
| LOC104882227                           | 0.184912 | 0.586935  | 6.78704  |
| LOC100252559,LOC100854759              | 2.92768  | 3.77395   | 32.6306  |
| LOC100854309                           | 1.67682  | 0.0203986 | 30.651   |
| LOC100250243,LOC104882236              | 2.35754  | 6.66125   | 17.5901  |
| LOC100854654                           | 1.56635  | 0.301487  | 0.617176 |
| LOC100854786                           | 0.223839 | 0.468378  | 2.55949  |
| LOC100262350                           | 0.94252  | 1.21524   | 9.66738  |
| LOC100245317                           | 3.90565  | 3.16744   | 0.548289 |
| LOC100264126                           | 15.5291  | 3.25641   | 15.6508  |
| LOC100252202                           | 4.33537  | 0.61252   | 1.94479  |
| LOC100252122                           | 3.02016  | 4.58804   | 12.6228  |
| LOC100259640                           | 4.4416   | 14.2385   | 47.6312  |
| LOC100254521                           | 9.32604  | 32.4114   | 44.534   |
| LOC100264872                           | 10.9204  | 7.65461   | 1.4551   |
| LOC100246060,LOC100259687,LOC104877432 | 25.1584  | 37.2551   | 142.754  |
| LOC104882063                           | 2.65676  | 0.532014  | 2.27525  |
| LOC104882038                           | 1.73427  | 16.9445   | 0.677285 |
| LOC100244353,LOC100247649,LOC100259623 | 80.3868  | 55.549    | 17.6109  |
| LOC100261410                           | 4.30013  | 3.36609   | 0.42542  |
| LOC100251162                           | 1.66028  | 1.00529   | 0.157518 |
| LOC100264804                           | 9.63262  | 1.96735   | 1.73847  |
| LOC104882047                           | 18.1371  | 0.84484   | 3.72243  |
| LOC100261150,LOC100854021,LOC104882049 | 3.84647  | 0.120231  | 49.6106  |
| LOC100250918                           | 0.191814 | 0.0997821 | 23.6682  |
| LOC104882030                           | 2.52802  | 12.5194   | 3.49008  |
| LOC100250146                           | 2.60486  | 11.0618   | 2.59532  |
| LOC100255225                           | 1.19619  | 4.80686   | 2.24544  |
| LOC104882109                           | 0.916272 | 1.20753   | 3.67998  |
| LOC100256068,LOC100853967              | 3.70052  | 0.229701  | 0.237618 |
| LOC100244664                           | 0.213544 | 2.11799   | 0.985644 |
| LOC100266985                           | 0.365414 | 0.150978  | 1.49638  |
| LOC100241305                           | 3.59947  | 0.452108  | 2.78677  |
| LOC100254849                           | 1.97188  | 9.29226   | 9.7445   |
| LOC100247997                           | 10.357   | 4.82402   | 2.21726  |
| LOC100854483                           | 5.94663  | 12.071    | 32.8587  |
| LOC100249257                           | 3.1979   | 2.16863   | 9.30588  |
| LOC100241724,LOC100264005              | 8.87234  | 0.849928  | 1.38819  |
| CBF4                                   | 16.2413  | 26.3294   | 0.278124 |
| LOC100853820                           | 0.124884 | 0.303111  | 1.72511  |
| LOC100855299                           | 0.164239 | 0.966935  | 2.66547  |
| LOC100254045                           | 0.226617 | 0.745886  | 3.47566  |
| STS                                    | 0.859574 | 0.821879  | 4.63422  |
| LOC100263437                           | 0.237056 | 0.375912  | 3.04235  |

|                           |           |           |          |
|---------------------------|-----------|-----------|----------|
| LOC100258294              | 0.200495  | 0.221566  | 1.55412  |
| LOC100241164              | 0.164085  | 0.294063  | 2.03932  |
| VINST1                    | 0.0443398 | 0.387047  | 1.69665  |
| LOC100259163              | 0.176845  | 0.29079   | 1.00609  |
| LOC100261929              | 1.54754   | 0.222689  | 1.34126  |
| LOC100853300              | 0.496742  | 0.173782  | 1.13585  |
| LOC100256632              | 52.7333   | 0.594717  | 5.9762   |
| LOC100251502,LOC100254969 | 1.94344   | 10.6104   | 2.19785  |
| LOC100853992              | 5.78491   | 0.771465  | 0.890509 |
| LOC100268009              | 114.111   | 26.9242   | 76.672   |
| LOC100242355              | 0         | 4.33535   | 1.1141   |
| LOC100852496              | 0.244329  | 2.76758   | 0.197448 |
| LOC104882218              | 0         | 1.8585    | 0.953644 |
| LOC104882188              | 1.04885   | 0.277199  | 0        |
| LOC100252698              | 2.03174   | 1.40687   | 0.351151 |
| LOC100251796              | 0.485692  | 6.20417   | 0.30256  |
| LOC100248494              | 1.95073   | 3.31155   | 0.55601  |
| LOC100854673              | 0.59477   | 0.937324  | 6.75912  |
| LOC100854608              | 2.48625   | 3.38998   | 10.4189  |
| LOC100251517              | 0.317954  | 0.332567  | 3.55079  |
| LOC100242248              | 1.80302   | 2.19843   | 10.1305  |
| LOC100251011              | 1.71839   | 0.798085  | 4.23045  |
| LOC100262818              | 1.14307   | 0.240165  | 9.33242  |
| LOC100854184              | 3.13154   | 2.31632   | 10.8768  |
| LOC100259612              | 0.663516  | 0.0180803 | 15.4128  |
| LOC104882232              | 4.16753   | 5.50252   | 23.7588  |
| LOC100854552              | 0.211024  | 0.684986  | 3.29317  |
| LOC100245376              | 1.9798    | 2.00543   | 14.0721  |
| LOC100247971              | 0.0845488 | 0.564318  | 1.48639  |
| LOC100243072              | 0.616337  | 0.963132  | 3.19787  |
| LOC100854816              | 0.982649  | 3.1611    | 14.5827  |
| LOC104877309              | 33.8371   | 9.26808   | 2.85415  |
| LOC100248613              | 1.10199   | 0.677856  | 5.78369  |
| LOC104877298              | 4.69625   | 6.22026   | 42.9603  |
| LOC100251999              | 0.676067  | 3.01994   | 4.04678  |
| LOC100253699              | 0.580476  | 5.82216   | 1.5964   |
| LOC100854106              | 27.1639   | 110.72    | 92.0178  |
| LOC100853807              | 27.4521   | 23.8211   | 1.42944  |
| LOC100854833              | 0         | 0         | 1.92207  |
| LOC100247409              | 21.0757   | 56.716    | 11.2588  |
| LOC100252577              | 10.8943   | 43.2462   | 6.66181  |
| LOC100255963              | 0.914468  | 1.25577   | 0.118831 |
| LOC100252457              | 1.38874   | 0.537672  | 3.56895  |
| LOC100244084              | 5.76532   | 0.946043  | 0.225122 |
| LOC100252663              | 0.716665  | 3.46152   | 6.67396  |
| LOC104882358              | 1.15355   | 7.49041   | 2.6718   |
| LOC100264572              | 372.009   | 583.5     | 94.5464  |

|                                        |           |          |           |
|----------------------------------------|-----------|----------|-----------|
| LOC100853765                           | 0.230214  | 1.06551  | 0.262782  |
| LOC100264510                           | 1.30526   | 0.951505 | 4.13189   |
| LOC100242377,LOC100252619              | 1.25381   | 0.263819 | 1.42413   |
| LOC100247513                           | 2.516     | 0.122836 | 0.111265  |
| LOC100254283                           | 16.5665   | 3.22344  | 19.3831   |
| LOC100250877                           | 1.0106    | 1.22033  | 0.141453  |
| LOC100259372                           | 0.0935245 | 32.5388  | 0         |
| LOC100264439                           | 20.3296   | 21.728   | 4.58634   |
| LOC100251925                           | 1.22674   | 0.223895 | 3.17867   |
| LOC100262082                           | 2.87449   | 9.8737   | 18.7583   |
| LOC100265615                           | 0.910748  | 4.35459  | 2.16183   |
| LOC104882315                           | 0.566815  | 2.72981  | 1.43031   |
| LOC100260496                           | 1.4581    | 1.08949  | 5.65161   |
| LOC100248401                           | 0.794559  | 0.694577 | 7.62029   |
| LOC100267332                           | 0.895591  | 12.8655  | 0.740273  |
| LOC104882309,LOC104882310              | 21.9265   | 90.5852  | 33.6494   |
| LOC100251801                           | 4.78543   | 2.08088  | 0.854133  |
| LOC104882305                           | 2.61746   | 0.962903 | 0.602973  |
| LOC104882303,LOC104882402,LOC104882403 | 0.896728  | 5.16173  | 2.9217    |
| LOC104882302                           | 7.34742   | 1.34739  | 1.03241   |
| LOC104882299                           | 0.133415  | 9.60636  | 0         |
| LOC100854641                           | 12.4858   | 113.688  | 44.1443   |
| LOC100241707                           | 53.2537   | 8.83678  | 2.12672   |
| LOC100243290                           | 0.0251644 | 1.0486   | 0.116541  |
| LOC100250205                           | 0.681158  | 1.91263  | 10.676    |
| LOC100258771                           | 31.6326   | 114.655  | 127.423   |
| LOC100241660                           | 75.449    | 4.27541  | 49.1559   |
| LOC100246781                           | 1.0671    | 0.150384 | 0.0714518 |
| LOC100251886                           | 0.267509  | 1.27588  | 0.203154  |
| LOC104882265                           | 48.1707   | 0        | 0         |
| LOC100255885                           | 31.8485   | 0.428881 | 0.848503  |
| LOC100246827                           | 42.2231   | 0        | 2.38142   |
| LOC100250188                           | 36.0234   | 0.628123 | 0.451463  |
| LOC104882423                           | 0         | 2.29715  | 0.936928  |
| LOC100259918                           | 0         | 2.68496  | 0.0789313 |
| LOC100242813                           | 1.00412   | 8.15903  | 3.64147   |
| LOC100240822                           | 0.365726  | 10.9339  | 3.75435   |
| LOC100256333                           | 2.81371   | 11.735   | 4.1248    |
| LOC100261419,LOC104882445              | 0.143614  | 0.352748 | 6.63158   |
| LOC100254316                           | 1.71878   | 9.51657  | 3.26182   |
| LOC100247469                           | 0.612327  | 0.212084 | 1.96196   |
| LOC100232957                           | 16.9495   | 2.24416  | 2.5684    |
| LOC100250902                           | 12.5484   | 41.625   | 8.45261   |
| LOC100259395                           | 46.4259   | 2.64746  | 7.72083   |
| LOC104882364                           | 1.40889   | 0.557818 | 4.96967   |
| LOC100242429                           | 90.8082   | 188.994  | 5.7468    |
| LOC100267867                           | 1.69762   | 2.08181  | 0.506157  |

|                           |          |           |           |
|---------------------------|----------|-----------|-----------|
| LOC100259401              | 1.13294  | 4.53385   | 1.54437   |
| LOC100260995              | 2.40041  | 12.8435   | 6.3725    |
| LOC100245709              | 1.03859  | 0.130307  | 2.16418   |
| LOC100250849              | 4.40627  | 0.78003   | 1.11084   |
| LOC100252666              | 1.84274  | 0.570484  | 2.97201   |
| LOC100252482              | 1.64126  | 6.66891   | 3.50248   |
| LOC100242382              | 11.0655  | 32.1999   | 1.65503   |
| LOC100264526              | 0.548442 | 10.4641   | 0.844458  |
| LOC100266459              | 0.395216 | 0.102307  | 4.72962   |
| LOC100245622              | 5.68314  | 12.4749   | 1.97782   |
| LOC100264676              | 33.4261  | 5.87827   | 34.6117   |
| LOC100249139              | 3.78968  | 0.308229  | 1.02579   |
| LOC100267898,LOC104882340 | 27.4862  | 2.73666   | 4.89175   |
| LOC104882339              | 2.63369  | 0.233586  | 0.521813  |
| LOC104882336              | 0.953526 | 4.04516   | 0.427617  |
| LOC100244020,LOC104882335 | 9.85693  | 1.79649   | 17.8705   |
| LOC100257634              | 1.17139  | 0.0942085 | 0.0620036 |
| LOC100262756              | 1.30016  | 1.64965   | 29.7745   |
| LOC100250718              | 10.2291  | 2.0339    | 37.8104   |
| LOC100259516              | 0.826445 | 0.517609  | 12.9896   |
| LOC100254255              | 0        | 0         | 1.56141   |
| LOC100854093              | 0        | 5.06082   | 2.57953   |
| LOC100246789              | 6.16799  | 16.7088   | 2.56536   |
| LOC104882407              | 3.59159  | 0.664799  | 0         |
| LOC100265609              | 2.21345  | 1.67032   | 0.431935  |
| LOC104882313              | 0.22608  | 0         | 1.59767   |
| LOC104877445              | 0.342279 | 5.16766   | 1.57314   |
| LOC104877445              | 0.261658 | 8.49483   | 5.82224   |
| LOC100265518              | 0.398715 | 1.79307   | 0.812848  |
| LOC100243316,LOC100265589 | 6.26078  | 1.9214    | 12.9497   |
| LOC100243281              | 0.328944 | 0         | 2.65024   |
| LOC100248406              | 10.0178  | 1.85941   | 11.0461   |
| LOC100255230              | 4.49335  | 0.524703  | 3.86397   |
| LOC100260306              | 3.67664  | 0.0725692 | 0.17589   |
| LOC100251811              | 12.3465  | 2.55424   | 2.19141   |
| LOC100262201              | 0.927496 | 0.145006  | 4.09857   |
| LOC100253569              | 9.60108  | 1.9351    | 5.06687   |
| LOC100248414              | 26.3432  | 264.477   | 18.0301   |
| LOC100256947              | 0.6995   | 5.77331   | 2.10327   |
| LOC100267218              | 0.396025 | 3.67192   | 0.886543  |
| LOC100253596              | 1.99535  | 8.3656    | 3.55978   |
| LOC100258202              | 0.654478 | 0.754839  | 9.30963   |
| LOC100264734              | 0.321379 | 1.86909   | 1.07213   |
| LOC100247858              | 56.9493  | 47.4348   | 3.23216   |
| LOC100256459              | 0.150931 | 2.37831   | 0         |
| LOC100259814              | 570.027  | 178.549   | 732.432   |
| LOC100252971              | 6.24458  | 25.6192   | 9.02046   |

|              |          |           |           |
|--------------|----------|-----------|-----------|
| LOC100255869 | 0.650828 | 2.72343   | 0.138733  |
| LOC100243654 | 40.532   | 95.8727   | 21.4748   |
| LOC100266142 | 2.13022  | 0.358954  | 0.0872385 |
| LOC100243824 | 2.08431  | 5         | 1.17792   |
| LOC100254126 | 156.796  | 268.358   | 62.279    |
| LOC100266033 | 8.08926  | 1.66242   | 13.0549   |
| LOC100267814 | 42.043   | 9.75818   | 25.4522   |
| LOC100255807 | 184.144  | 58.9114   | 29.7711   |
| FLS1         | 105.017  | 252.322   | 26.1216   |
| LOC100243852 | 0.617563 | 6.87113   | 2.95478   |
| LOC100249002 | 0        | 1.01407   | 0.0700087 |
| LOC100267796 | 1.04507  | 3.17234   | 0.676102  |
| LOC100259038 | 1.07744  | 0.116056  | 0.0803997 |
| LOC100262526 | 3.79518  | 1.18235   | 4.80631   |
| LOC100255713 | 0.80289  | 18.9693   | 0.0969499 |
| LOC100259041 | 42.0443  | 320.749   | 25.3188   |
| LOC100264214 | 8.78917  | 25.9418   | 1.67349   |
| LOC100242154 | 6.19483  | 20.7579   | 0.262619  |
| LOC100247269 | 1.09468  | 0         | 0         |
| LOC100232945 | 15.3088  | 0.592329  | 18.6784   |
| LOC100257440 | 0.684932 | 1.29693   | 3.76054   |
| LOC100255834 | 0        | 9.01794   | 0.0196806 |
| LOC100260903 | 14.2404  | 1.20995   | 0.893868  |
| LOC100266106 | 1.65047  | 0         | 0.038592  |
| LOC100250659 | 70.527   | 67.748    | 3.69501   |
| LOC100257444 | 187.692  | 33.3913   | 57.7425   |
| LOC100257455 | 1.68852  | 31.512    | 3.44997   |
| LOC100852519 | 2.6915   | 3.45348   | 0.778547  |
| LOC100245542 | 31.2569  | 1.01488   | 7.20272   |
| LOC100250666 | 5.71577  | 33.675    | 8.98123   |
| LOC100852809 | 1.02562  | 0.668897  | 0.242341  |
| LOC100267847 | 1.06901  | 9.44485   | 3.63603   |
| LOC100853609 | 40.1736  | 8.7874    | 13.165    |
| LOC100250670 | 1.49121  | 10.1133   | 1.88666   |
| LOC100855129 | 3.24393  | 1.10668   | 86.9628   |
| LOC100257363 | 20.4614  | 5.96754   | 162.554   |
| LOC104882608 | 1.40668  | 0.0341853 | 0.202687  |
| LOC100252330 | 0.478259 | 0.116336  | 6.47513   |
| LOC100245555 | 1.51366  | 0.165994  | 5.11729   |
| LOC100259186 | 7.19014  | 4.13087   | 37.7062   |
| LOC100257464 | 0.458757 | 4.59819   | 0.382266  |
| LOC100245440 | 5.92196  | 47.1906   | 1.77743   |
| LOC100264245 | 2.85804  | 14.0763   | 2.54602   |
| LOC100232856 | 37.7259  | 34.9247   | 3.55207   |
| LOC104882553 | 7.35265  | 44.503    | 12.3836   |
| LOC100252348 | 2.26072  | 0.414251  | 1.43742   |
| LOC100253967 | 23.7362  | 2.57564   | 3.31423   |

|                                        |          |           |           |
|----------------------------------------|----------|-----------|-----------|
| LOC100243742                           | 128.519  | 17.2854   | 18.0841   |
| LOC100267792                           | 9.03562  | 0.173798  | 0         |
| LOC100245479                           | 16.2917  | 0.554033  | 0.0622616 |
| LOC100264374                           | 13.7914  | 0.723485  | 0.20295   |
| LOC100245451                           | 27.6585  | 2.13689   | 4.54127   |
| LOC100259232                           | 101.054  | 3.00077   | 0.250004  |
| LOC100245483                           | 24.0277  | 13.1633   | 89.1433   |
| LOC100259201                           | 12.7761  | 6.27114   | 32.2437   |
| LOC104882624                           | 0        | 2.20026   | 5.02776   |
| LOC100247883                           | 0.205802 | 0.583935  | 1.57022   |
| LOC100265028                           | 40.4243  | 6.12116   | 40.3088   |
| LOC104882627                           | 7.42669  | 1.34844   | 4.668     |
| LOC104882634                           | 0.105375 | 0         | 1.03124   |
| LOC100266519                           | 19.0336  | 0.263311  | 0.149197  |
| LOC104882657                           | 2.02726  | 0.083866  | 0         |
| LOC104882647                           | 2.07772  | 0         | 0.257216  |
| LOC100855105                           | 0.606106 | 56.7607   | 62.1241   |
| LOC100246007,LOC100256305              | 0.989757 | 9.70901   | 0.473085  |
| LOC100261402                           | 0.105105 | 5.18337   | 0.371935  |
| LOC100259650                           | 0.516923 | 22.0422   | 7.01007   |
| LOC100248240                           | 1.17711  | 0.15725   | 0.82351   |
| LOC104882792                           | 1.82282  | 7.8902    | 3.54932   |
| LOC104882765                           | 17.9335  | 4.2306    | 9.92991   |
| LOC100263202                           | 2.33962  | 3.50236   | 0.677273  |
| LOC100259577                           | 35.811   | 0.571782  | 0.0551456 |
| LOC104882755                           | 18.6077  | 4.40921   | 21.3478   |
| LOC104882756                           | 1.26276  | 0.876225  | 4.7048    |
| LOC100249918                           | 20.0252  | 0.182875  | 0.0424782 |
| LOC104882753                           | 4.6351   | 8.78836   | 21.8468   |
| LOC100244789                           | 53.359   | 7.7133    | 33.2741   |
| LOC104882742                           | 0.789407 | 2.21277   | 7.14719   |
| LOC100267062                           | 2.39676  | 3.26127   | 0.200808  |
| LOC104882774                           | 2.62955  | 14.1942   | 0.438541  |
| LOC104882737                           | 4.25212  | 20.8524   | 0         |
| LOC100241404,LOC100261990,LOC104877463 | 34.6852  | 3.84854   | 3.34476   |
| LOC100232974                           | 2.84407  | 0.631487  | 3.05478   |
| LOC100261993                           | 0.600636 | 2.47368   | 5.5236    |
| LOC100249990                           | 0.445701 | 3.7785    | 0.210009  |
| LOC100263585                           | 9.36932  | 15.4461   | 1.51597   |
| LOC104877465                           | 10.6853  | 0         | 0.170556  |
| LOC100240987                           | 38.6191  | 31.1165   | 3.3227    |
| LOC100246080                           | 14.3855  | 1.14195   | 9.64535   |
| LOC100251307                           | 23.1521  | 69.1165   | 15.7485   |
| LOC100264998                           | 2.47197  | 0.0284438 | 0         |
| LOC100258191                           | 4.3035   | 0.413263  | 0.118863  |
| LOC100244516                           | 702.53   | 75.3159   | 528.307   |
| LOC100261556                           | 0.234027 | 0.0249626 | 2.76056   |

|                           |           |          |          |
|---------------------------|-----------|----------|----------|
| LOC100244431              | 3.94497   | 0.208561 | 57.5892  |
| LOC100252239              | 3.25606   | 1.15052  | 188.716  |
| LOC100250509              | 235.396   | 55.7212  | 215.995  |
| LOC100253953              | 1.11565   | 4.70171  | 4.00008  |
| LOC104882455              | 5.86489   | 0.719788 | 3.9409   |
| LOC100262541              | 121.806   | 18.5944  | 20.1983  |
| LOC100267702              | 0.403777  | 1.68528  | 0.999896 |
| LOC100262500              | 3.4504    | 8.01243  | 14.6009  |
| LOC100252247,LOC100259095 | 12.4852   | 18.3787  | 2.94875  |
| LOC100253886              | 13.9926   | 22.7798  | 77.4669  |
| NDHM                      | 56.7551   | 13.5833  | 32.0121  |
| LOC100255774              | 0.290604  | 1.55767  | 0.396458 |
| LOC100247245              | 114.134   | 21.9086  | 114.032  |
| LOC100264284              | 2.89572   | 1.02549  | 5.97767  |
| LOC100242002              | 2.7957    | 0        | 0        |
| LOC100267819              | 60.442    | 25.8234  | 2.87892  |
| LOC104882590              | 1.41981   | 0        | 0        |
| LOC100264320              | 130.464   | 34.3606  | 153.557  |
| LOC100265988              | 8.1221    | 11.4574  | 34.0631  |
| LOC100243675              | 0.0162382 | 0.161171 | 1.76055  |
| LOC100245494              | 2.71966   | 17.6562  | 2.88977  |
| LOC100245527              | 82.1746   | 145.726  | 16.9021  |
| LOC100259159              | 5.57085   | 20.1107  | 4.49633  |
| LOC100247181              | 1.39613   | 0.582901 | 2.40178  |
| LOC100259040              | 0.253362  | 2.82206  | 0.868654 |
| LOC104882515              | 4.37691   | 0.52867  | 1.65272  |
| LOC100243681              | 39.18     | 206.9    | 71.8017  |
| LOC100257558              | 104.234   | 23.2232  | 53.9414  |
| LOC100248932              | 1.91821   | 5.04737  | 1.23011  |
| LOC100254044              | 17.4971   | 2.77535  | 4.10692  |
| LOC100254056              | 7.15348   | 27.1568  | 5.71019  |
| LOC100255742              | 14.9806   | 6.0554   | 1.83076  |
| LOC100248852              | 0.902212  | 4.34918  | 0.430441 |
| LOC100264365              | 75.9363   | 6.28207  | 64.6368  |
| LOC100255862              | 3.26092   | 7.83591  | 1.04006  |
| LOC100266134              | 2.839     | 3.65683  | 0.817512 |
| LOC100852518              | 0         | 7.36572  | 0        |
| LOC100255764              | 273.828   | 1115.07  | 658.35   |
| LOC100255659              | 0.757779  | 1.72791  | 0.281297 |
| LOC100267776              | 36.5788   | 117.139  | 25.1295  |
| LOC100250687,LOC100255866 | 2.24668   | 0.224469 | 17.6444  |
| LOC100260935              | 4.21893   | 17.1244  | 30.8159  |
| LOC100245351              | 1.27855   | 7.31337  | 0        |
| LOC100247221              | 32.3956   | 15.8213  | 78.0257  |
| LOC100266028              | 23.5037   | 1.24963  | 8.12022  |
| LOC104882619              | 0         | 1.08574  | 0        |
| LOC100243642              | 13.4645   | 2.87529  | 6.13147  |



|                           |           |           |           |
|---------------------------|-----------|-----------|-----------|
| LOC100249009              | 20.7657   | 3.39217   | 0.267848  |
| LOC100854714              | 0.477764  | 0.052979  | 7.10532   |
| LOC100251262              | 14.6876   | 53.2596   | 3.68219   |
| LOC104882628              | 0.95318   | 4.49234   | 2.74799   |
| LOC100266619              | 0.4018    | 6.7108    | 0.189831  |
| LOC104882660              | 1.99141   | 8.85149   | 4.08494   |
| LOC100267998              | 0.0584933 | 0.348142  | 1.63723   |
| LOC100266412              | 50.2996   | 9.97573   | 46.5033   |
| LOC100253881,LOC104882696 | 2.46391   | 7.36892   | 0.960825  |
| LOC104882688              | 0.34492   | 1.72015   | 19.7955   |
| LOC104882695              | 0.283539  | 0.131481  | 1.26972   |
| LOC100262406              | 1.63338   | 0.667271  | 0.103059  |
| LOC100257198              | 65.7183   | 83.6753   | 14.7661   |
| LOC100247036              | 1.56869   | 6.90496   | 2.07254   |
| LOC104882698              | 28.112    | 2.17038   | 0.181112  |
| LOC100266302              | 0.438508  | 4.2479    | 6.05488   |
| LOC100249129              | 0.226029  | 5.00038   | 2.05226   |
| LOC100259326              | 2.69458   | 0         | 0.0673245 |
| LOC104882732              | 1.46144   | 16.0929   | 7.91552   |
| LOC100251142              | 0.392945  | 3.29705   | 2.50247   |
| LOC100256299              | 2.36572   | 46.3137   | 61.0743   |
| LOC104882731              | 0         | 1.34526   | 0.235729  |
| LOC104882716              | 7.87411   | 2.16328   | 9.00436   |
| LOC100855211              | 0.844135  | 7.28787   | 0.262491  |
| LOC100855175              | 0.0545792 | 4.95071   | 0.0910403 |
| LOC100854974              | 0.0736844 | 0.602067  | 1.24959   |
| LOC104882763              | 347.661   | 1.87342   | 592.691   |
| LOC100249337              | 0.226492  | 0.579109  | 1.9705    |
| LOC104882759              | 0.998271  | 0.165929  | 1.18963   |
| LOC100264754              | 1.39462   | 4.50094   | 7.69297   |
| LOC100249347              | 2.72706   | 0.0993685 | 0.425635  |
| LOC104882785              | 2.76763   | 1.15073   | 0.263824  |
| LOC100853769              | 1.07275   | 0.222305  | 0.101478  |
| LOC100246469              | 29.9222   | 19.2992   | 4.33858   |
| LOC104882750              | 0.284717  | 20.4579   | 3.88799   |
| LOC100251613              | 23.5916   | 35.6837   | 6.11422   |
| LOC100255177              | 8.71787   | 2.47165   | 0.705584  |
| LOC104882746              | 0         | 16.2618   | 0         |
| LOC104882778              | 0         | 1.7824    | 1.07392   |
| LOC100260265              | 1.65598   | 0.024204  | 0.055788  |
| LOC100246577              | 2.94921   | 7.56023   | 0.553029  |
| LOC104877338,LOC104882775 | 1.08055   | 1.85165   | 0.398281  |
| LOC100260274              | 9.81491   | 0.0584947 | 0.0690817 |
| LOC100243063              | 10.7244   | 18.5746   | 0.0615897 |
| LOC104877454              | 29.334    | 12.7924   | 4.03009   |
| LOC100241421              | 1.6731    | 0.142157  | 0.329914  |
| LOC100246457              | 782.854   | 185.491   | 749.777   |

|                           |           |          |           |
|---------------------------|-----------|----------|-----------|
| LOC104877475              | 0.473142  | 2.10734  | 0.952237  |
| LOC100246887,LOC104877480 | 11.194    | 2.832    | 11.4303   |
| LOC100250347              | 9.40227   | 3.11648  | 1.62443   |
| LOC100255526              | 0.880326  | 2.96522  | 5.22643   |
| LOC104877488              | 3.47689   | 1.56346  | 0.561273  |
| LOC100252025              | 1.01434   | 0.402729 | 0         |
| LOC104877492              | 1.60379   | 0        | 0         |
| LOC100262261              | 1.12019   | 2.12504  | 0.210958  |
| LOC100247013              | 9.75522   | 29.5048  | 2.89109   |
| LOC100253740              | 2.75398   | 0.227971 | 2.77936   |
| LOC100267548              | 6.83122   | 0.299958 | 0.0301467 |
| LOC100243603              | 81.0002   | 158.299  | 17.3822   |
| LOC100241893,LOC100264179 | 2.41506   | 9.95756  | 3.64234   |
| LOC100247026              | 11.9859   | 1.90103  | 2.2774    |
| LOC100245140              | 2.51581   | 0.727187 | 3.1965    |
| LOC100854890              | 9.37849   | 25.7715  | 6.09631   |
| LOC100255559              | 16.7457   | 4.47646  | 1.77077   |
| LOC100241764              | 5.69296   | 34.1612  | 10.8797   |
| LOC100855163              | 4.72525   | 20.9701  | 9.21923   |
| LOC100245111              | 20.5153   | 2.26541  | 4.46633   |
| LOC104877563              | 0         | 3.16128  | 4.22373   |
| LOC100243607              | 106.879   | 2.63675  | 5.19818   |
| LOC100248744              | 0.337422  | 0.063656 | 2.48889   |
| LOC100248633              | 0.791576  | 1.84863  | 0         |
| LOC104877523              | 0.298973  | 2.05382  | 0.384606  |
| LOC100243528              | 4.7888    | 3.92968  | 0.410015  |
| LOC104877564              | 0         | 16.1099  | 0.704822  |
| LOC100257297              | 1.34536   | 5.85708  | 1.3599    |
| LOC100260648              | 0.248812  | 0.364629 | 19.4285   |
| LOC100246936              | 0.846424  | 0.173694 | 4.47165   |
| LOC100245158              | 1.74252   | 0.291317 | 1.28201   |
| LOC100260532              | 0.802364  | 0.205101 | 4.03611   |
| LOC100252174              | 7.09465   | 1.08453  | 9.77612   |
| LOC100267572              | 8.48536   | 1.27696  | 9.99688   |
| LOC100255581              | 0.695943  | 1.31927  | 2.99784   |
| LOC104877363              | 0.760132  | 0.858401 | 8.97028   |
| LOC100260654              | 0.686524  | 0.219586 | 1.08204   |
| LOC100265866              | 0.514385  | 1.45719  | 2.5899    |
| LOC100247054              | 0.0719238 | 0        | 1.90196   |
| LOC100267424              | 27.5827   | 89.2385  | 19.4799   |
| LOC100258992              | 24.3376   | 5.46295  | 58.6442   |
| LOC100854699              | 2.63074   | 16.9714  | 2.41288   |
| LOC100232954              | 5.10542   | 41.7856  | 0.807651  |
| LOC100248576              | 2.78682   | 1.07792  | 6.37258   |
| LOC100247069,LOC100260669 | 3.03819   | 1.85712  | 11.2923   |
| LOC100855066              | 394.296   | 22.6194  | 70.8014   |
| LOC100258850              | 25.4958   | 11.6511  | 3.74904   |

|                           |          |           |           |
|---------------------------|----------|-----------|-----------|
| LOC100252001              | 1.49447  | 6.75321   | 0.535812  |
| LOC100257348              | 4.52489  | 5.68585   | 0.523494  |
| LOC100257132              | 1.42248  | 2.35585   | 10.3913   |
| LOC100258895              | 29.8842  | 99.4493   | 21.5757   |
| LOC104877617              | 1.24569  | 4.7706    | 7.15716   |
| LOC104877619              | 106.435  | 3.51863   | 13.3808   |
| LOC104877623              | 0.355108 | 1.85933   | 0.657373  |
| LOC104877633              | 5.69574  | 0.383262  | 0.880578  |
| LOC100260102              | 1.11637  | 0         | 1.32149   |
| LOC100852799              | 0.53819  | 0.309358  | 1.94178   |
| LOC100265592              | 0.331652 | 0.0325667 | 1.33068   |
| LOC100258661              | 3.48364  | 0.164988  | 17.4111   |
| LOC100244996              | 10.9311  | 0.943096  | 1.2957    |
| LOC100257113              | 7.56838  | 8.13363   | 1.24814   |
| LOC100249165              | 0.861387 | 1.17755   | 6.65713   |
| LOC100245600,LOC100250733 | 11.1789  | 54.8668   | 20.5099   |
| NCED1                     | 65.2577  | 12.3542   | 1.45767   |
| LOC100245388              | 21.6926  | 2.883     | 11.8235   |
| LOC100262651              | 88.9052  | 20.4098   | 43.923    |
| LOC100264177              | 48.1891  | 85.9402   | 7.53899   |
| LOC100254366              | 1.45293  | 0         | 0.655941  |
| LOC100249095              | 0.182806 | 0.794283  | 1.28918   |
| LOC100254368              | 8.92866  | 2.39417   | 0.957584  |
| LOC100268036              | 3.79976  | 2.28677   | 0.472797  |
| LOC100261089              | 0.466943 | 6.08554   | 0.801945  |
| LOC104877754              | 0.755471 | 1.43131   | 0.189324  |
| LOC100241033,LOC100251285 | 2.17526  | 0.0297945 | 0.0203716 |
| LOC100242693              | 0.206119 | 1.07395   | 0.685761  |
| LOC104877751              | 0        | 4.74663   | 0         |
| LOC104877752              | 0        | 8.95238   | 0.305686  |
| LOC100253035              | 3.52087  | 2.11146   | 0.369593  |
| LOC100246160              | 2.86671  | 0.232587  | 1.16978   |
| LOC100251299              | 1.25549  | 0         | 0         |
| LOC100243362              | 1.24093  | 1.56398   | 7.20118   |
| LOC100248382              | 8.46385  | 0.266137  | 0.317786  |
| LOC104877548              | 16.4991  | 3.00727   | 2.86516   |
| LOC100250342              | 8.30519  | 19.921    | 4.12949   |
| LOC100265805              | 3.95066  | 4.81789   | 0.35175   |
| LOC100250462              | 7.72109  | 14.5879   | 31.9913   |
| LOC100243606              | 0.464381 | 1.49181   | 3.32192   |
| LOC100257253              | 0.539244 | 3.68165   | 0.35281   |
| LOC100252148              | 0.522545 | 3.11038   | 1.12648   |
| LOC100245332              | 11.3886  | 51.9036   | 4.26586   |
| LOC100255434              | 11.3141  | 34.0178   | 6.38981   |
| LOC100255553              | 0.345591 | 1.80079   | 1.39087   |
| LOC100262405              | 8.07287  | 0.0872002 | 40.6626   |
| LOC100255568              | 6.6979   | 27.8396   | 12.7905   |

|                           |           |           |          |
|---------------------------|-----------|-----------|----------|
| LOC100260642              | 1.36486   | 7.04013   | 2.87552  |
| LOC100265853              | 2.88497   | 2.29797   | 0.694741 |
| LOC100258925              | 0.147611  | 0.0721701 | 1.18429  |
| LOC104877575              | 2.59074   | 4.21356   | 13.3433  |
| LOC100262308              | 3.91177   | 0.203346  | 1.0752   |
| LOC100267579              | 0.430104  | 2.22527   | 2.69317  |
| LOC100245275              | 0.119262  | 0.857471  | 1.88861  |
| LOC100260657              | 0.854001  | 0.0976573 | 1.45306  |
| LOC100243545              | 2.25196   | 2.44032   | 22.0671  |
| LOC100247061,LOC100262430 | 9.86083   | 5.07838   | 24.2046  |
| LOC100260545              | 3.16809   | 1.43553   | 9.21722  |
| LOC104877534              | 0.81597   | 0.89699   | 9.9536   |
| LOC100265876              | 2.50011   | 0.556314  | 4.86363  |
| LOC100257265              | 15.454    | 42.674    | 4.56681  |
| LOC104877540              | 59.8497   | 0         | 83.5706  |
| LOC100263996              | 7.3503    | 3.92537   | 1.04212  |
| LOC104877544              | 0.106655  | 17.4924   | 0.95724  |
| LOC100258946              | 0.565997  | 3.11236   | 0.512275 |
| LOC100257229              | 47.9793   | 4.77615   | 64.6089  |
| LOC100262336              | 0.227651  | 0.779351  | 1.21267  |
| LOC100255495              | 1.20282   | 2.11453   | 9.27748  |
| LOC100262461              | 1.45702   | 2.49326   | 0.373748 |
| LOC100245129              | 0.525834  | 0.272256  | 4.06967  |
| LOC100262347              | 2.71393   | 7.37338   | 1.73661  |
| LOC104877601              | 1.13089   | 0         | 0.305901 |
| LOC100260574              | 5.23074   | 0.482525  | 0.188014 |
| LOC100252011              | 0.414069  | 0.858035  | 2.11475  |
| LOC100260095              | 6.04082   | 13.8942   | 26.1076  |
| LOC100254999              | 4.62377   | 8.88205   | 30.87    |
| LOC100249765              | 23.102    | 29.6149   | 104.754  |
| LOC100260085              | 11.7993   | 6.57665   | 40.5005  |
| LOC100257941              | 21.5543   | 1.55054   | 4.67533  |
| LOC100264837              | 29.035    | 1.913     | 2.55426  |
| LOC100853541              | 27.0183   | 1.212     | 5.7276   |
| LOC104877635              | 0.0832599 | 0.0251446 | 2.85753  |
| LOC104877638              | 1.50033   | 0.154691  | 1.32152  |
| LOC100265261              | 0.909215  | 0.466175  | 3.63482  |
| LOC104877680              | 0         | 15.4128   | 0.294487 |
| LOC104877687              | 3.26888   | 0.651715  | 0.259463 |
| LOC100263459              | 58.549    | 4.60117   | 22.8203  |
| LOC100256700              | 4.33315   | 19.5256   | 2.76232  |
| LOC100232878              | 1.70126   | 0         | 0.248513 |
| LOC104877696              | 3.81603   | 0.991155  | 4.52976  |
| LOC104877716              | 0.936509  | 0.07861   | 9.91651  |
| LOC104877739              | 0.261332  | 1.74898   | 0.138489 |
| LOC100248909              | 2.42869   | 0.204608  | 2.23976  |
| LOC104877704              | 2.24256   | 0.125784  | 0.531221 |

|                           |           |           |          |
|---------------------------|-----------|-----------|----------|
| LOC100265976              | 2.4731    | 0.124797  | 0.534251 |
| LOC104877712,LOC104877713 | 397.98    | 72.2363   | 172.334  |
| LOC104877708              | 1.43218   | 0.204628  | 3.47696  |
| LOC100252450              | 57.9293   | 15.023    | 60.9845  |
| LOC100254239              | 10.5399   | 0.230295  | 2.74578  |
| LOC104877768              | 0.471006  | 2.20324   | 2.33802  |
| LOC100259488              | 0.01878   | 1.12145   | 0.122054 |
| LOC100855352              | 5.86792   | 7.03029   | 23.4975  |
| LOC100264678              | 0.661839  | 1.27712   | 0.197247 |
| LOC104877779              | 1.39279   | 0         | 0        |
| LOC100249639              | 0.411834  | 0.447782  | 7.11299  |
| LOC104877773              | 0.219564  | 0.268189  | 2.74102  |
| LOC100261532              | 0.291484  | 0.398757  | 2.08874  |
| LOC100242776              | 2.24129   | 18.652    | 10.0942  |
| LOC100261538              | 0.122488  | 1.00175   | 0.276756 |
| LOC104877794              | 0.35397   | 2.05962   | 0.552877 |
| LOC100262204              | 29.409    | 4.90439   | 38.3387  |
| LOC100241699              | 3.8241    | 11.5227   | 2.86592  |
| LOC100245045              | 8.24586   | 0.452789  | 0.600171 |
| LOC100257104              | 18.9178   | 3.99554   | 8.63575  |
| LOC100247840              | 133.402   | 6.16534   | 53.7817  |
| LOC100253121              | 4.22648   | 1.49214   | 59.005   |
| LOC100246236              | 9.0175    | 0.976646  | 0.750536 |
| LOC100244488              | 3.84755   | 0.12091   | 0.231963 |
| LOC100259871              | 1.8196    | 0.0669943 | 0.687017 |
| LOC100247913,LOC100261528 | 4.42098   | 33.611    | 20.3297  |
| LOC100258169              | 9.74656   | 0.799073  | 2.93042  |
| LOC100253026              | 51.3778   | 5.95403   | 33.8856  |
| LOC100256431              | 112.68    | 16.1333   | 111.266  |
| LOC100232903              | 28.4586   | 6.5943    | 8.43386  |
| LOC100258241              | 0.640007  | 0.362728  | 3.36104  |
| LOC100261507              | 22.6515   | 9.21043   | 1.29907  |
| LOC100242834              | 39.4679   | 7.93775   | 10.0535  |
| LOC100242751              | 0.375658  | 2.13493   | 0.711696 |
| LOC100242765              | 14.7816   | 4.50353   | 20.7433  |
| LOC100246127              | 0.340197  | 1.51345   | 0.170411 |
| LOC100244461              | 13.6746   | 70.0127   | 43.6582  |
| LOC100263272              | 96.2594   | 3.97531   | 10.4889  |
| LOC100247951              | 0.0919319 | 3.14758   | 0        |
| LOC100253072              | 47.0659   | 164.397   | 1.27707  |
| LOC100259834              | 27.0166   | 5.97149   | 40.0786  |
| LOC100265112              | 58.5739   | 7.9088    | 16.4736  |
| LOC100253090              | 5.51038   | 0.740756  | 1.2556   |
| GFH2                      | 21.1737   | 25.805    | 117.067  |
| LOC100244464              | 13.2853   | 2.92449   | 11.335   |
| LOC100257513              | 1.56464   | 8.84271   | 4.20611  |
| LOC104882473              | 1.37851   | 12.0557   | 5.05881  |

|                           |          |           |           |
|---------------------------|----------|-----------|-----------|
| LOC100248824,LOC100253917 | 0.414198 | 2.23225   | 2.67455   |
| LOC100260905              | 4.88868  | 14.0881   | 1.67982   |
| LOC104882430              | 0.427565 | 1.49349   | 0.15307   |
| LOC100262694              | 10.9383  | 1.75748   | 0.594985  |
| LOC100255790              | 16.4804  | 0.677789  | 18.8218   |
| LOC100245547              | 11.7542  | 0.682577  | 1.18924   |
| LOC100254114              | 0.198801 | 0.0900508 | 3.99387   |
| LOC100259234              | 0.210589 | 2.94143   | 0         |
| LOC100264277              | 7.28361  | 0.0332977 | 0         |
| LOC104877547              | 4.43503  | 26.0719   | 20.2399   |
| BCH1                      | 28.8014  | 1.49007   | 5.94319   |
| LOC100253481              | 1.74404  | 7.618     | 1.86216   |
| LOC104881172              | 0.635242 | 3.92568   | 1.42584   |
| LOC100260321              | 1.24681  | 3.02755   | 5.24738   |
| LOC100265535              | 4.08305  | 0.387507  | 6.1643    |
| LOC104881234              | 450.526  | 32.8429   | 141.183   |
| LOC100253577              | 43.435   | 61.5459   | 3.32049   |
| LOC100266707              | 3.27922  | 34.8698   | 1.09798   |
| LOC100241028              | 126.006  | 35.9575   | 4.02003   |
| LOC100232921              | 4.55358  | 0.0758945 | 1.09229   |
| LOC100246227              | 16.3559  | 76.8626   | 8.64888   |
| LOC100241085              | 85.1256  | 194.322   | 24.9268   |
| LOC100261582              | 39.3557  | 5.92047   | 6.86156   |
| LOC100244525              | 0.377231 | 1.04337   | 1.5305    |
| LOC100265094              | 1.52949  | 2.13306   | 0.496925  |
| LOC104881793              | 0.591043 | 3.63895   | 1.31531   |
| LOC100855232              | 43.7389  | 7.40104   | 33.1078   |
| LOC100249883              | 8.50249  | 2.70669   | 1.31753   |
| LOC100255700              | 28.523   | 62.7818   | 9.64315   |
| LOC100852547              | 0.29473  | 1.24563   | 0.39921   |
| LOC100852585              | 0.161091 | 1.67046   | 0.769123  |
| LOC100262648              | 0.793231 | 16.4355   | 3.97006   |
| LOC104882149              | 1.93057  | 3.05224   | 0.527827  |
| LOC100247246              | 11.3695  | 19.1994   | 60.9274   |
| LOC100262575,LOC100267737 | 18.9923  | 4.93304   | 19.8921   |
| LOC100267676              | 11.8705  | 28.967    | 2.41938   |
| LOC100257457              | 9.17238  | 3.27505   | 17.0349   |
| LOC100262584              | 6.98085  | 1.64142   | 6.13945   |
| LOC100266021              | 2.21305  | 0.535488  | 0.0594404 |
| LOC104882267              | 2.60663  | 0.979018  | 4.19445   |
| LOC100267763              | 47.9837  | 3.05373   | 10.1695   |
| LOC100247257              | 21.8858  | 4.5667    | 23.7434   |
| LOC100854691              | 0.65713  | 1.9452    | 0.374615  |
| LOC104882541              | 2.68572  | 0         | 0.894785  |
| LOC104882797              | 0.128475 | 1.50702   | 0         |
| LOC100243193              | 0.40363  | 8.89761   | 0.0796957 |
| LOC100853472              | 0        | 1.43      | 0.580459  |

|                                        |           |           |           |
|----------------------------------------|-----------|-----------|-----------|
| LOC100243166,LOC100252759,LOC100257911 | 166.701   | 325.165   | 34.3579   |
| LOC100263045                           | 4.34954   | 2.05002   | 0         |
| LOC104882747                           | 0         | 0         | 27.5005   |
| LOC100247760                           | 0.495064  | 0.246932  | 1.71198   |
| LOC100258009                           | 1.19491   | 0.755142  | 4.42188   |
| LOC100242634                           | 53.7236   | 7.47423   | 18.8058   |
| LOC100245972                           | 1.1676    | 0.274571  | 0.0389536 |
| LOC104877655                           | 42.2108   | 2.8417    | 1.29175   |
| LOC100251100                           | 32.1908   | 3.5927    | 28.1357   |
| LOC100252859                           | 19.9047   | 0.196984  | 1.16999   |
| LOC104878760                           | 0.0824034 | 6.28527   | 0.116589  |
| LOC100262354                           | 2013.94   | 428.833   | 2028.43   |
| LOC100265851                           | 21.5973   | 2.29628   | 26.4153   |
| LOC100252008                           | 25.0208   | 2.32031   | 47.4766   |
| LOC100250384                           | 18.1098   | 3.03957   | 10.7435   |
| LOC100246872                           | 16.3599   | 3.20714   | 13.5112   |
| LOC100241903                           | 2.03764   | 0.88789   | 3.97353   |
| LOC100257186                           | 81.9297   | 16.2485   | 45.3449   |
| LOC100243519                           | 1714.8    | 202.218   | 212.877   |
| LOC100246920                           | 6.93497   | 0.341368  | 0.372212  |
| LOC100241790                           | 5.89665   | 0.16574   | 0.131139  |
| LOC100241895                           | 183.552   | 10.2163   | 6.47409   |
| LOC100232985                           | 152.938   | 19.4429   | 21.3107   |
| LOC100252141                           | 0.313186  | 0         | 1.14864   |
| LOC100241879                           | 7.7408    | 15.916    | 2.26338   |
| LOC104878764                           | 21.4886   | 2.77269   | 17.7958   |
| LOC100852969                           | 3.55765   | 1.06043   | 8.46266   |
| LOC100253828                           | 11.583    | 18.0704   | 2.19198   |
| LOC104878801                           | 5.07564   | 1.66376   | 0.660552  |
| LOC100252012,LOC100264033              | 73.2561   | 165.399   | 4484.4    |
| LOC100241751                           | 3.43139   | 0.28388   | 0.0327526 |
| LOC100248616                           | 15.7953   | 2.68765   | 0.715505  |
| LOC100247063                           | 0.176281  | 1.88143   | 1.90396   |
| LOC100260659                           | 0.224659  | 9.06866   | 0.40499   |
| LOC100255589                           | 2.09025   | 30.1308   | 12.738    |
| LOC100255489                           | 27.7592   | 6.44687   | 16.3539   |
| LOC100252102                           | 1.04803   | 0.0318708 | 0         |
| LOC100267575                           | 2.37564   | 5.13817   | 0.695622  |
| GT3                                    | 6.22718   | 25.4721   | 6.3401    |
| LOC100249174                           | 0.999197  | 2.04986   | 0.508463  |
| LOC100243866                           | 174.654   | 3.29849   | 49.4173   |
| LOC100250741                           | 4.42105   | 12.9607   | 1.65882   |
| LOC100854891                           | 19.3385   | 42.8163   | 6.111     |
| LOC100258342                           | 0.737167  | 0.515658  | 3.42373   |
| LOC100263462                           | 6.50363   | 2.74055   | 12.9128   |
| LOC100241185                           | 9.98799   | 1.53945   | 9.09847   |
| LOC100244955                           | 6.60404   | 34.6578   | 14.0174   |

|                           |           |           |           |
|---------------------------|-----------|-----------|-----------|
| LOC100257661              | 8.59118   | 2.81359   | 1.73778   |
| LOC100255590              | 21.4533   | 0.201678  | 0.233811  |
| LOC104878897              | 192.578   | 0         | 0         |
| LOC100264127              | 6.61082   | 2.66969   | 0.612625  |
| LOC104877407              | 0.55931   | 0.0726963 | 3.05528   |
| LOC100245203              | 0.154416  | 1.73239   | 6.68531   |
| LOC100253706              | 0.679115  | 0.513898  | 2.16014   |
| LOC104878920              | 3.07447   | 29.7742   | 13.8507   |
| LOC100255511              | 1.07662   | 0.0512753 | 0.18164   |
| LOC100244413              | 58.9501   | 2.74454   | 18.947    |
| LOC100259788              | 96.3307   | 37.4804   | 2.07888   |
| LOC100242699              | 0.126031  | 0.46359   | 4.7047    |
| LOC100852931              | 0.0931449 | 2.56459   | 0.403549  |
| LOC104878931              | 2.20712   | 4.96043   | 0.268268  |
| LOC100262128              | 2.18257   | 9.46083   | 14.383    |
| LOC100267294              | 0.200516  | 0.201084  | 1.91022   |
| LOC100265746              | 5.02083   | 38.232    | 11.6464   |
| LOC100255572              | 1.16649   | 13.554    | 2.55981   |
| LOC100257242              | 32.4208   | 7.23304   | 16.2472   |
| LOC104878622              | 0.539326  | 0.604199  | 4.63794   |
| LOC100243525              | 7.15393   | 3.73212   | 21.5366   |
| LOC100241748              | 16.9237   | 1.69784   | 8.79024   |
| LOC104878514              | 11.143    | 1.69438   | 7.27456   |
| LOC100260633,LOC104878769 | 6.40185   | 12.9282   | 27.2776   |
| LOC104877365              | 0.183962  | 0.108995  | 1.15232   |
| LOC100262288,LOC104878475 | 0.516356  | 0.811406  | 34.6783   |
| LOC104878206              | 7.32055   | 3.08918   | 1.51159   |
| LOC100258846              | 0.130537  | 1.3544    | 0.304525  |
| LOC100258952              | 40.048    | 185.447   | 8.38727   |
| LOC100248635              | 9.26028   | 1.84804   | 5.81138   |
| LOC100257334              | 2.15209   | 0.284212  | 0.857693  |
| LOC100241765              | 206.85    | 39.6382   | 143.735   |
| LOC100248701              | 13.8976   | 2.55291   | 3.45083   |
| LOC100250304              | 0.465475  | 3.73669   | 0.750489  |
| LOC100853747              | 18.6049   | 129.11    | 50.7524   |
| LOC100853060              | 6.80221   | 0         | 3.42389   |
| LOC100852930              | 22.098    | 4.25379   | 116.96    |
| LOC100265877              | 3.24543   | 10.3001   | 0.533836  |
| LOC104878797              | 2.86984   | 0.511334  | 2.10171   |
| LOC100262425              | 0.577334  | 2.16162   | 2.54326   |
| LOC100265781              | 15.7898   | 31.0362   | 3.98218   |
| LOC100250317              | 0.419504  | 1.37316   | 2.56587   |
| LOC100854716              | 0.671006  | 6.15623   | 2.66063   |
| LOC100245274              | 25.4518   | 166.816   | 57.0709   |
| LOC104878826              | 1.01951   | 0.522957  | 2.32452   |
| LOC100249018              | 0.13492   | 0.97297   | 0.0893842 |
| LOC100252521              | 163.369   | 31.4527   | 40.4365   |



|              |          |           |           |
|--------------|----------|-----------|-----------|
| LOC100254953 | 5.19757  | 14.8344   | 3.60635   |
| LOC100242957 | 0.387194 | 3.56367   | 0         |
| LOC100249805 | 2.45405  | 10.1612   | 8.20226   |
| LOC100258264 | 35.7037  | 14.8285   | 3.53712   |
| LOC100254942 | 1.27711  | 1.61535   | 5.70486   |
| LOC104878821 | 0.407128 | 23.726    | 7.90832   |
| LOC100242950 | 0.848875 | 49.0037   | 14.3292   |
| LOC104878852 | 1.47019  | 0.174001  | 0.575815  |
| LOC100241199 | 17.8993  | 1.7768    | 46.1701   |
| LOC100265128 | 0        | 106.348   | 2.09644   |
| LOC100247990 | 1.50821  | 3.55589   | 45.4816   |
| LOC100253281 | 1.3729   | 11.1715   | 5.16205   |
| LOC104878838 | 3.33964  | 0.289568  | 4.66782   |
| LOC100245063 | 1.08136  | 0.0791471 | 0.156536  |
| LOC100248359 | 4.68     | 0.468176  | 0.160848  |
| LOC104878854 | 4.65145  | 26.5251   | 15.8442   |
| LOC100853701 | 1.05828  | 0         | 0         |
| LOC100242451 | 583.018  | 213.357   | 106.387   |
| LOC100264583 | 21.2707  | 40.2158   | 9.24375   |
| LOC100854587 | 9.79455  | 7.00803   | 1.32656   |
| LOC100245618 | 96.6836  | 261.059   | 21.3858   |
| LOC100247569 | 9.04253  | 15.156    | 2.52125   |
| LOC100254955 | 0.225025 | 1.38258   | 1.30318   |
| LOC104878935 | 5.3501   | 0         | 0         |
| LOC104878949 | 1.03252  | 0         | 5.95478   |
| LOC100260591 | 2.96857  | 0.471927  | 1.35949   |
| LOC100258247 | 12.7011  | 1.93115   | 13.8776   |
| LOC104878956 | 2.93941  | 1.24381   | 8.24305   |
| LOC100266732 | 14.3995  | 2.12009   | 0.0704905 |
| LOC100249571 | 4.42332  | 0.265911  | 0.211643  |
| LOC100246147 | 2.41699  | 0.169294  | 0.301153  |
| LOC104878964 | 1.49468  | 2.83727   | 0.345971  |
| LOC104878930 | 0.323955 | 1.36852   | 0.107147  |
| LOC104878967 | 0.762443 | 6.6108    | 2.30071   |
| LOC104878968 | 0.269938 | 2.62689   | 1.89477   |
| LOC100264558 | 1.38508  | 0.276528  | 0         |
| LOC100250983 | 2.82491  | 0.486022  | 2.46167   |
| LOC100247345 | 0.858039 | 9.12592   | 1.70075   |
| LOC100244081 | 0.687098 | 3.86767   | 4.14353   |
| LOC100247549 | 60.3544  | 17.1023   | 13.2096   |
| LOC100266257 | 0.541685 | 1.27412   | 2.32204   |
| LOC100245594 | 8.2758   | 24.5719   | 41.8685   |
| LOC100266170 | 686.539  | 138.654   | 707.395   |
| LOC100262760 | 23.8078  | 38.8551   | 3.44346   |
| LOC100266387 | 0.122797 | 36.9908   | 3.18877   |
| LOC100254391 | 1.292    | 7.9905    | 2.20732   |
| LOC100244029 | 0.396942 | 3.84447   | 2.0683    |

|                           |           |           |           |
|---------------------------|-----------|-----------|-----------|
| LOC100257828              | 0         | 4.69196   | 0.987989  |
| LOC100254294              | 0.259079  | 1.06166   | 0.107759  |
| LOC100245775              | 0.110339  | 0.99026   | 0         |
| LOC100233124              | 1054.75   | 272.869   | 231.645   |
| LOC104879004,LOC104879005 | 38.5822   | 3.16162   | 2.88411   |
| LOC100852625,LOC104879049 | 52.7658   | 0.503818  | 2.05078   |
| LOC100259346              | 13.4134   | 0         | 0         |
| LOC100252668              | 34.6426   | 4.07061   | 105.261   |
| LOC100249127              | 21.2606   | 0.490622  | 67.0619   |
| LOC100243964              | 2.12426   | 0.897247  | 27.8911   |
| LOC100267929,LOC104879010 | 1.23268   | 13.0393   | 9.58286   |
| LOC100249017              | 0.461434  | 2.12137   | 1.42282   |
| LOC100245608              | 4.75914   | 40.1284   | 0.493462  |
| LOC100267884              | 11.0174   | 1.85333   | 7.82638   |
| LOC100266288              | 17.7148   | 60.5595   | 14.1951   |
| LOC100264556              | 35.1037   | 145.365   | 1.33073   |
| LOC100261098              | 29.1934   | 85.0925   | 11.0724   |
| LOC100262394,LOC100855255 | 1.49699   | 0.746163  | 20.9435   |
| LOC100252152              | 1.86775   | 0.112775  | 0.421755  |
| LOC104879083              | 0.277321  | 0.0762439 | 3.64652   |
| LOC100244374              | 1.5184    | 3.23522   | 7.99569   |
| LOC100263252              | 49.9149   | 1.67421   | 30.0565   |
| LOC100243401              | 76.9798   | 731.335   | 606.564   |
| LOC100240846              | 0.131419  | 8.54435   | 0.153782  |
| LOC104879142              | 1.68923   | 16.4464   | 8.29675   |
| LOC100253069              | 19.1041   | 0.341338  | 0.141284  |
| LOC100258123              | 11.0823   | 2.80819   | 2.4113    |
| LOC100249594              | 1.8685    | 0.685986  | 4.34531   |
| LOC100247207,LOC104877277 | 3.75706   | 19.1307   | 5.75491   |
| LOC100232959              | 72.0076   | 1.43224   | 0.461805  |
| LOC100245432              | 25.0347   | 8.45775   | 3.18223   |
| LOC100267863              | 8.02098   | 1.2736    | 12.6845   |
| LOC100852851              | 976.191   | 137.186   | 824.724   |
| LOC104879153              | 0         | 1.02503   | 1.5336    |
| LOC100254111              | 0.0844252 | 3.02892   | 0         |
| LOC100853656              | 0.11179   | 0         | 1.11027   |
| LOC100242046              | 5.57286   | 0.89054   | 2.79829   |
| LOC100267807              | 0.1293    | 1.33575   | 3.18763   |
| LOC100852999              | 0.0539736 | 1.40551   | 0         |
| LOC100260762              | 19.1894   | 3.29907   | 17.4656   |
| LOC100262664              | 3.82091   | 26.8319   | 7.81305   |
| LOC100265977              | 1.23343   | 0.0940029 | 5.60851   |
| LOC100255135              | 2.55883   | 0.646552  | 10.1045   |
| LOC100258522              | 6.90525   | 1.76578   | 8.17123   |
| LOC104879175              | 0.781279  | 0.323655  | 1.6927    |
| LOC100243051              | 7.14882   | 0.312653  | 1.70934   |
| LOC100249991              | 1.08589   | 0.108238  | 0.0779885 |

|                           |           |           |           |
|---------------------------|-----------|-----------|-----------|
| LOC100260227              | 20.1025   | 47.241    | 8.94568   |
| LOC104879039              | 0.15187   | 0.258862  | 1.85747   |
| LOC100247400              | 0.612838  | 2.66416   | 2.03549   |
| LOC100254330              | 0.293185  | 1.21973   | 1.14417   |
| LOC100243983              | 32.3396   | 33.0481   | 7.41099   |
| LOC100245734              | 5.99263   | 8.05751   | 1.46847   |
| LOC100268056              | 2.33973   | 2.87243   | 0.491972  |
| LOC104879042              | 1.70618   | 0.309908  | 0.311354  |
| LOC100250941              | 4.68465   | 12.7037   | 0         |
| LOC104879047              | 0.0422504 | 8.94463   | 0         |
| LOC100266306              | 24.6193   | 13.0674   | 5.87863   |
| LOC100259505              | 4.30594   | 12.4617   | 1.81887   |
| LOC100252547              | 37.8768   | 3.13729   | 4.37058   |
| LOC100247435,LOC100252542 | 4.24892   | 0.816194  | 2.29487   |
| LOC100242385              | 4.30133   | 26.5496   | 0.69177   |
| LOC104879007              | 0.78586   | 0.591811  | 4.41116   |
| LOC100255917              | 0.53454   | 0.950427  | 2.61689   |
| LOC100260991              | 0.30489   | 1.64372   | 0.275079  |
| LOC100261242              | 25.3064   | 0.808849  | 0.521702  |
| LOC100250693              | 0.173571  | 0.434241  | 1.01536   |
| LOC100267924              | 2.82999   | 0.621961  | 7.67008   |
| LOC100257754              | 0.250004  | 2.22736   | 0         |
| BIG8.1                    | 5.54484   | 0.5141    | 0         |
| LOC100242373              | 2.10143   | 4.39037   | 0.390176  |
| LOC100266177              | 0.421884  | 0.598325  | 4.61057   |
| LOC100264507              | 294.363   | 347.671   | 34.064    |
| LOC100259329              | 55.9901   | 8.42103   | 12.5742   |
| LOC104879028              | 3.05837   | 38.596    | 0.0804923 |
| LOC100854026              | 69.1103   | 196.922   | 1.67494   |
| LOC100254251              | 6.90482   | 0.891947  | 8.68876   |
| LOC104879031              | 0.152136  | 0.525996  | 2.12085   |
| LOC100252630              | 0.176024  | 4.86192   | 0.370884  |
| LOC100255364              | 0.722659  | 3.51107   | 1.77012   |
| LOC104879074              | 0.623188  | 3.85689   | 0.516745  |
| LOC100853090              | 0         | 1.62077   | 0.212702  |
| GST4                      | 2.57603   | 161.607   | 53.1522   |
| LOC100242814              | 46.9637   | 5.37448   | 7.97223   |
| LOC100253049              | 1.66543   | 0.612481  | 2.51647   |
| LOC100252964              | 2.04427   | 0.467969  | 1.87512   |
| LOC100251398              | 8.57807   | 11.1416   | 2.43914   |
| LOC100266832              | 11.2748   | 0.0431116 | 0         |
| LOC100246097              | 3.19797   | 24.2966   | 4.90952   |
| LOC100242811              | 6.86741   | 2.99791   | 0.0832491 |
| LOC100253073              | 2.99031   | 0.383132  | 0.0558939 |
| LOC100257611              | 1.81161   | 0.174628  | 0         |
| LOC100253926              | 52.761    | 9.92909   | 9.4962    |
| LOC100250664              | 0.273787  | 1.15418   | 0.121159  |

|                           |          |          |           |
|---------------------------|----------|----------|-----------|
| LOC100247201              | 7.30042  | 0.735367 | 6.81479   |
| LOC100852825              | 58.6654  | 10.4344  | 63.7373   |
| LOC100252339              | 0.76548  | 0.341099 | 1.41927   |
| LOC100262676              | 9.42546  | 1.49196  | 2.67739   |
| LOC100254123,LOC100264417 | 3.14704  | 12.5907  | 6.79867   |
| LOC100266089              | 5.97569  | 0.223373 | 0.0322661 |
| LOC100267164              | 0.335324 | 1.4001   | 0.501283  |
| LOC100243044              | 67.8578  | 138.868  | 23.3011   |
| LOC100241482              | 2.39604  | 0.736839 | 5.96172   |
| LOC100256778              | 2.08497  | 1.67282  | 0.51344   |
| LOC100253381              | 79.6482  | 149.701  | 4.29666   |
| LOC100261887              | 2.37606  | 3.73229  | 13.06     |
| LOC100256795              | 0.570747 | 0.203848 | 5.52896   |
| LOC100246525              | 1.80683  | 1.64689  | 11.272    |
| LOC104879210              | 0.13039  | 4.34806  | 0.917458  |
| LOC100260215              | 16.1533  | 1.54667  | 13.8175   |
| LOC100263757              | 2.15272  | 1.01243  | 0.422649  |
| LOC100232986              | 69.0644  | 5.88237  | 4.88245   |
| LOC100260200              | 21.0668  | 3.76813  | 13.22     |
| LOC100261865              | 3.359    | 0.220249 | 0.20869   |
| LOC100251646              | 1.17794  | 5.47394  | 1.23604   |
| LOC100258599              | 3.06731  | 5.37097  | 1.19964   |
| LOC100260126,LOC100261862 | 5.40603  | 0.102787 | 25.7245   |
| LOC100249877              | 3.45767  | 14.0293  | 12.3298   |
| LOC100242064              | 0.161568 | 0.278683 | 3.62126   |
| LOC100251122,LOC100261424 | 2.03546  | 0        | 0         |
| LOC100263206              | 75.4836  | 10.8334  | 70.5867   |
| LOC100254448              | 0.442153 | 3.03353  | 0.849573  |
| LOC100259559              | 1.56994  | 0        | 0.76517   |
| LOC100246027              | 80.1237  | 2.66958  | 26.2264   |
| LOC100261307              | 1.29687  | 0.406182 | 0.281536  |
| LOC100263026              | 0.916474 | 2.166    | 4.87904   |
| LOC100240820              | 0.315444 | 1.55782  | 0.834089  |
| LOC100259548              | 6.56614  | 1.56936  | 0.977765  |
| LOC100249318              | 273.462  | 36.3059  | 130.304   |
| LOC100244323              | 0.623861 | 0.232421 | 3.5149    |
| LOC100259685              | 4.63364  | 2.46865  | 12.1659   |
| LOC104879261              | 4.97785  | 0.885241 | 6.40899   |
| LOC100266533              | 0.515483 | 2.27574  | 1.30058   |
| LOC100245936              | 0.59005  | 1.71857  | 0.396997  |
| LOC100247714              | 23.4233  | 74.0921  | 0.781933  |
| LOC100266636              | 0.533956 | 2.98633  | 1.41296   |
| LOC100240949,LOC100246042 | 6.26604  | 1.98685  | 1.15131   |
| LOC104879283              | 0.154259 | 1.37967  | 0.195295  |
| LOC100266490              | 9.74218  | 13.5194  | 3.36225   |
| LOC100240799              | 1.93863  | 1.55295  | 0.196626  |
| LOC100247670              | 0.246709 | 0.568893 | 1.07523   |

|                                        |           |           |           |
|----------------------------------------|-----------|-----------|-----------|
| LOC100264824                           | 1.11981   | 0.790515  | 0         |
| LOC104879309                           | 67.9548   | 3.91625   | 3.08309   |
| LOC100245922                           | 7.61977   | 1.37326   | 7.39245   |
| LOC100240829                           | 0.815248  | 2.10238   | 0.299598  |
| LOC100251134                           | 1.88968   | 3.58298   | 12.2195   |
| LOC100263051                           | 14.3013   | 15.252    | 93.4463   |
| LOC100853148                           | 0.299946  | 0.0382462 | 1.40801   |
| LOC104879300                           | 0         | 0         | 1.36662   |
| LOC100254512                           | 216.712   | 53.9385   | 114.923   |
| LOC100261291                           | 31.0032   | 4.82711   | 7.59307   |
| LOC100265737                           | 104.159   | 21.9604   | 127.241   |
| LOC100252165                           | 54.4448   | 12.9762   | 22.1006   |
| LOC104879365                           | 1.26479   | 0.774562  | 9.61316   |
| LOC100247011,LOC104877443              | 0.458028  | 0.723233  | 17.0791   |
| LOC104879379                           | 0.789548  | 0.513729  | 5.37122   |
| LOC104879362                           | 0.554266  | 1.19184   | 5.79184   |
| LOC104879383                           | 4.84414   | 0.860161  | 5.13799   |
| LOC100242720                           | 0.145511  | 0.229331  | 1.36511   |
| LOC100255642                           | 51.9914   | 7.90051   | 5.78704   |
| LOC100260716                           | 5.82013   | 2.00734   | 0.516434  |
| LOC100855271                           | 3.37201   | 1.83413   | 0.196724  |
| LOC100265923                           | 6.37126   | 1.19368   | 0.206777  |
| LOC100243600                           | 3.52561   | 5.16353   | 1.18982   |
| LOC100250340                           | 3.81272   | 0.474848  | 0.168905  |
| LOC100243487                           | 4.33862   | 6.19307   | 1.33335   |
| LOC100248120                           | 1.66986   | 1.35101   | 6.78354   |
| LOC100254977                           | 7.09032   | 1.03696   | 13.6074   |
| LOC100252474,LOC104879438,LOC104879449 | 2.98797   | 4.74188   | 0.1654    |
| LOC104879450                           | 3.68011   | 1.33856   | 0.0999711 |
| LOC104879452                           | 1.2885    | 0.596443  | 2.77761   |
| LOC104879484                           | 3.92377   | 0.166445  | 0         |
| LOC100252583                           | 1.01338   | 0         | 0         |
| LOC104879487                           | 0.0350745 | 3.10518   | 3.827     |
| LOC100852873,LOC104879468              | 0.0265359 | 1.55729   | 0.0369628 |
| LOC100852910                           | 0.168316  | 1.53742   | 0.312974  |
| LOC100243918                           | 4.56353   | 1.64671   | 0.0955714 |
| LOC100261035                           | 6.41557   | 11.7343   | 2.63052   |
| LOC100267952                           | 1.48731   | 0.434331  | 0         |
| LOC100266359                           | 0.658801  | 3.35105   | 0         |
| LOC100249215                           | 1.63007   | 6.53968   | 4.04905   |
| LOC104877314                           | 7.39186   | 3.4135    | 14.8197   |
| LOC100253295                           | 14.9941   | 69.1853   | 7.49598   |
| LOC100246529                           | 46.2629   | 9.1813    | 7.93667   |
| LOC100241405                           | 1.49944   | 0.2803    | 0.90127   |
| LOC100246514                           | 2.88929   | 0.0638528 | 0.345177  |
| LOC100855355                           | 0.103153  | 6.71625   | 3.25842   |
| LOC100256873,LOC104879213              | 0.120164  | 10.9361   | 9.10104   |

|              |           |           |          |
|--------------|-----------|-----------|----------|
| LOC100263762 | 2.52755   | 0.680807  | 2.82104  |
| PR10.9       | 0.248014  | 0.530753  | 9.21536  |
| PR10.7       | 100.72    | 136.265   | 443.794  |
| PR10.4       | 0         | 0.36944   | 27.9428  |
| PR10.2       | 545.446   | 83.3389   | 955.696  |
| LOC100244758 | 0.310211  | 0.357359  | 2.34627  |
| PR10.3       | 8.34004   | 16.7068   | 64.6882  |
| LOC100258513 | 36.3867   | 81.2451   | 18.7805  |
| LOC100249978 | 48.5605   | 1.99269   | 7.33204  |
| LOC100244843 | 1.2756    | 0.235545  | 1.85017  |
| LOC100261982 | 104.832   | 24.765    | 20.0773  |
| LOC100248243 | 1.81468   | 6.39937   | 0.806424 |
| LOC100253439 | 0.760269  | 1.47112   | 0.307431 |
| NIN1         | 49.1588   | 80.026    | 15.9013  |
| LOC100248153 | 7.03238   | 1.27341   | 0.168035 |
| LOC100244750 | 0.290995  | 1.85429   | 0.814176 |
| LOC100241949 | 27.5564   | 9.36073   | 1.613    |
| LOC100249856 | 1.34147   | 0.334934  | 0.525388 |
| LOC100854284 | 0.0954816 | 3.38586   | 20.1504  |
| LOC100257958 | 5.81968   | 13.2145   | 1.80098  |
| LOC100853716 | 0.123061  | 8.82175   | 24.0676  |
| LOC100252810 | 2.2493    | 0.0847156 | 0.471473 |
| LOC100259665 | 4.36525   | 0.333555  | 7.87816  |
| LOC100259606 | 1.84146   | 0.354544  | 0.626312 |
| LOC100247690 | 39.8067   | 2.17574   | 21.9191  |
| LOC100263079 | 78.592    | 23.7448   | 107.785  |
| HT5          | 23.959    | 7.92417   | 51.4358  |
| LOC100263185 | 18.5787   | 51.5063   | 0.809978 |
| LOC100266656 | 0.899678  | 0.41967   | 2.27532  |
| LOC100264835 | 7.74608   | 0.974524  | 3.55338  |
| LOC100245945 | 18.3601   | 3.27489   | 11.5383  |
| LOC104879258 | 1.25674   | 0.181984  | 0        |
| LOC100261405 | 26.8094   | 146.323   | 12.0202  |
| LOC104879259 | 0.743164  | 6.13942   | 1.39926  |
| LOC100242476 | 0.324225  | 1.45547   | 0.142374 |
| LOC100259585 | 0.245087  | 1.67286   | 0.215114 |
| LOC100254571 | 1.09852   | 11.541    | 0.796505 |
| LOC100244152 | 3.0797    | 15.4214   | 4.5025   |
| LOC100244302 | 30.4238   | 8.49706   | 37.5348  |
| LOC100249531 | 3.09836   | 0.771594  | 3.92541  |
| LOC100240909 | 0.757695  | 1.79195   | 0        |
| LOC100252896 | 10.9547   | 9.90824   | 1.19173  |
| LOC100242646 | 12.0365   | 5.05102   | 1.92051  |
| LOC100254634 | 14.028    | 3.71571   | 0.980937 |
| LOC100247822 | 13.2041   | 1.40703   | 0.695697 |
| LOC100242457 | 4.09749   | 1.20477   | 0.790174 |
| LOC100258020 | 0.844792  | 0         | 8.98566  |

|                                        |          |           |           |
|----------------------------------------|----------|-----------|-----------|
| LOC100245916                           | 1.05671  | 3.03916   | 5.00334   |
| LOC100251128                           | 8.69608  | 0.885732  | 2.81394   |
| LOC100852713                           | 2.45216  | 0.30691   | 2.5792    |
| LOC104879322                           | 2.21623  | 0.518256  | 0.719067  |
| LOC100247669                           | 1.38173  | 0.339256  | 0.928939  |
| LOC104879336                           | 11.8173  | 2.92521   | 3.22973   |
| LOC104879346                           | 7.65553  | 1.93297   | 10.4049   |
| LOC100250370                           | 0.419608 | 1.36208   | 0.220161  |
| LOC104879393                           | 3.16057  | 0.461129  | 0.866459  |
| LOC100262385                           | 26.384   | 1.25114   | 19.6327   |
| LOC100250447                           | 1.39098  | 0.548288  | 4.9037    |
| LOC104879358,LOC104879382              | 3.39619  | 0.829016  | 19.2663   |
| LOC104879355,LOC104879357              | 2.71583  | 1.57502   | 7.51119   |
| LOC100232905                           | 10.3058  | 7.80342   | 1.83644   |
| LOC100263523                           | 3.88076  | 20.2941   | 6.72876   |
| LOC100246287                           | 6.27073  | 7.28358   | 0.530732  |
| LOC100258300                           | 0.92408  | 0.478438  | 2.68532   |
| LOC100244703                           | 53.2663  | 0.558182  | 46.2948   |
| LOC100244617                           | 1.28759  | 17.3325   | 5.09629   |
| LOC104879403                           | 0        | 1.03792   | 0.362829  |
| LOC100854122                           | 2.86355  | 0.199016  | 0.630965  |
| LOC100244599,LOC104879424              | 2.35222  | 8.97286   | 0.560386  |
| LOC104879441                           | 0.588771 | 0         | 2.06051   |
| LOC104879437                           | 0.505894 | 0.215425  | 6.93833   |
| LOC100246215                           | 0.176563 | 0         | 1.45651   |
| LOC104879458                           | 0.701722 | 3.22747   | 1.57676   |
| LOC100256145                           | 0.22084  | 1.21126   | 0.592919  |
| LOC104879460,LOC104879474,LOC104879477 | 14.8751  | 2.46641   | 4.13527   |
| LOC104879459                           | 5.63602  | 2.22192   | 0.639697  |
| LOC100252444                           | 2.17837  | 0.0177081 | 0         |
| LOC100241320                           | 1.2008   | 0.061066  | 0.0278112 |
| LOC104879465                           | 6.25323  | 1.04621   | 1.09033   |
| LOC100244062                           | 0.814842 | 0.837984  | 3.53204   |
| LOC100266390                           | 0.906265 | 2.94239   | 4.98395   |
| LOC100266390                           | 0.338621 | 2.49768   | 0.61691   |
| LOC100257687                           | 0        | 4.23275   | 0         |
| LOC100245803                           | 3.08045  | 0.453608  | 6.31565   |
| LOC100244031                           | 0.591931 | 3.08886   | 0         |
| CHI4D                                  | 164.372  | 30.8331   | 22.6102   |
| LOC100264726                           | 0.787133 | 0.69478   | 5.32      |
| LOC104879495                           | 7.02102  | 4.59021   | 47.6682   |
| LOC100254133                           | 2.55333  | 0.523731  | 0.691849  |
| LOC100252695                           | 29.6928  | 4.43231   | 41.4586   |
| MLO15                                  | 32.2755  | 76.1119   | 18.4177   |
| LOC100267326                           | 1.06691  | 3.23809   | 5.29397   |
| LOC100260393                           | 10.8117  | 2.52279   | 3.02953   |
| LOC104879636                           | 1.7339   | 3.90973   | 0.784461  |

|                           |           |           |          |
|---------------------------|-----------|-----------|----------|
| LOC100243306              | 0.314702  | 0.740401  | 1.47757  |
| LOC100243308              | 6.22615   | 25.633    | 10.4616  |
| LOC100244918              | 2.39606   | 33.2925   | 9.38752  |
| LOC100263839              | 1.43683   | 2.17247   | 8.31881  |
| LOC100241568              | 0.873168  | 2.79894   | 13.397   |
| LOC100250058              | 8.65489   | 0.271143  | 0.340197 |
| LOC100260297              | 6.49691   | 0.607201  | 2.1354   |
| LOC100250160              | 4.27592   | 0.535143  | 34.2382  |
| LOC100260409              | 0.701084  | 0.124503  | 5.82549  |
| LOC100267338              | 1.58876   | 0.0993553 | 4.77863  |
| LOC100854491              | 0.551241  | 0.630815  | 8.12629  |
| LOC100263963              | 24.0194   | 54.5969   | 12.9477  |
| LOC100241685              | 34.1829   | 6.33823   | 22.5781  |
| LOC100257066              | 1.86812   | 13.9503   | 4.42838  |
| LOC100265633              | 6.94201   | 29.5411   | 17.6012  |
| LOC100253551              | 0.695918  | 3.05049   | 0.115042 |
| LOC100233064              | 0.489733  | 0.878202  | 7.27105  |
| LOC100262213              | 76.9888   | 17.9595   | 69.2043  |
| LOC100854381              | 0.0369323 | 1.34708   | 0.188072 |
| LOC100265533              | 47.7429   | 66.9227   | 7.57263  |
| LOC100853532              | 16.8782   | 4.12009   | 17.8955  |
| LOC100253567              | 0.446199  | 10.5107   | 1.96187  |
| LOC100246732              | 95.667    | 19.6702   | 88.358   |
| LOC100248386              | 13.7932   | 16.6324   | 59.9921  |
| LOC100255251              | 77.6653   | 5.42678   | 1.28785  |
| LOC100258718              | 12.2474   | 170.913   | 20.1653  |
| LOC100250096              | 30.7496   | 168.404   | 121.289  |
| LOC100262025              | 0.409492  | 1.62771   | 2.92217  |
| LOC100262131              | 4.27688   | 3.7091    | 0.442891 |
| LOC100246740              | 82.5607   | 84.6544   | 6.61605  |
| LOC100244990              | 0.849543  | 3.72536   | 1.45266  |
| LOC100265705              | 0.178663  | 1.06726   | 0.569079 |
| LOC100241511              | 2.61973   | 43.8204   | 36.7213  |
| LOC100251984,LOC100262142 | 3.14973   | 0.33614   | 3.0682   |
| LOC100257005              | 12.6112   | 20.7217   | 4.85253  |
| LOC100248379              | 4.5892    | 26.0387   | 17.3674  |
| LOC100853628              | 0.171725  | 0.121452  | 0.994796 |
| LOC100261566              | 1.14685   | 4.97509   | 4.42552  |
| LOC104877370              | 1.22958   | 0.61134   | 5.77618  |
| LOC100853401,LOC104877424 | 0.60008   | 0.837469  | 2.62588  |
| LOC100854978              | 11.2706   | 0.0895669 | 0.498114 |
| LOC100266720              | 0         | 20.121    | 2.51516  |
| LOC100258223              | 0.13264   | 1.5633    | 0.15936  |
| LOC100254753              | 1.06115   | 0.274336  | 0        |
| LOC104877273              | 8.29727   | 4.30368   | 20.8572  |
| LOC100852531              | 0.972759  | 0         | 0.13866  |
| LOC100241335              | 3.18875   | 1.48707   | 8.72814  |



|                           |          |          |          |
|---------------------------|----------|----------|----------|
| LOC100244850              | 9.1253   | 2.23889  | 8.10614  |
| LOC100249897              | 2.46888  | 1.28156  | 0.3435   |
| LOC100267088              | 1.05385  | 0        | 0        |
| LOC100244772              | 8.25901  | 1.47348  | 8.04771  |
| LOC100265353              | 18.1684  | 0.674711 | 11.5926  |
| LOC100266673              | 2.36224  | 0.329091 | 0.250481 |
| LOC100262186              | 5.62706  | 1.52801  | 8.33449  |
| LOC100263879              | 5.66165  | 9.27151  | 0.828863 |
| LOC100263868              | 6.59118  | 1.13412  | 0.621993 |
| LOC100255259              | 21.3594  | 10.4221  | 5.14074  |
| LOC104879739              | 0.727728 | 1.93161  | 3.2275   |
| LOC100253485              | 46.3613  | 91.2696  | 4.23611  |
| LOC104879726              | 8.68629  | 0.758333 | 0        |
| LOC100263939              | 1.78168  | 3.14911  | 0.720978 |
| LOC100246689              | 3.19411  | 0.568642 | 2.94325  |
| LOC100245016              | 1.32126  | 6.36329  | 11.5806  |
| LOC104879597              | 0        | 1.46195  | 7.4563   |
| LOC100263831              | 89.2088  | 15.4023  | 67.5384  |
| LOC100250050              | 0.772775 | 2.94324  | 0.539632 |
| LOC100263837              | 69.2515  | 20.2325  | 13.3252  |
| LOC100260408              | 4.98359  | 1.08979  | 2.48649  |
| LOC100244923              | 45.8606  | 11.4257  | 43.4402  |
| LOC104879585              | 1.38162  | 0        | 1.74221  |
| LOC100245035              | 0.272882 | 1.26288  | 0.399746 |
| LOC100253650              | 14.2646  | 2.86476  | 18.2779  |
| LOC100253658              | 118.84   | 20.51    | 5.13016  |
| LOC100248357              | 4.12413  | 0.311751 | 1.46788  |
| LOC100241584              | 23.2427  | 5.67315  | 13.8522  |
| LOC100248374              | 37.7647  | 35.4599  | 0.348367 |
| LOC100267285              | 24.8309  | 4.28054  | 18.9523  |
| LOC100250194              | 0.811198 | 5.82347  | 0.959114 |
| LOC104879535              | 1.26651  | 1.7829   | 0.297585 |
| LOC100241610              | 245.068  | 1.37748  | 1.21581  |
| LOC104879521              | 2.05902  | 3.49617  | 0.454365 |
| LOC100241653,LOC100265673 | 0.934106 | 3.57766  | 0.333977 |
| LOC100854085              | 0.599461 | 2.57765  | 0.972954 |
| LOC100242686              | 25.2374  | 19.3551  | 6.29657  |
| LOC100253092              | 1.45802  | 0.100543 | 0        |
| LOC104879680              | 10.9325  | 25.8648  | 1.86549  |
| LOC104879656              | 1.4504   | 0.701987 | 0.22301  |
| LOC104879650              | 1.8508   | 0.735094 | 3.74065  |
| LOC100256828              | 18.8111  | 1.84433  | 0.876454 |
| LOC100261927              | 394.56   | 80.3798  | 369.493  |
| LOC104879642              | 1.08928  | 4.86887  | 3.03259  |
| LOC100258526              | 0.787566 | 0.306224 | 6.42635  |
| LOC100246636              | 1.28726  | 0.882898 | 3.66151  |
| LOC100261829              | 31.7897  | 83.1947  | 14.2954  |

|                           |          |          |           |
|---------------------------|----------|----------|-----------|
| LOC100248267              | 2.46378  | 0.588074 | 3.66036   |
| LOC100248292              | 5.11717  | 1.27523  | 35.8801   |
| LOC100254606              | 0.360499 | 4.39562  | 0.553403  |
| LOC100259719              | 0.355433 | 1.67254  | 0.0742906 |
| LOC100246816              | 0.522129 | 1.56042  | 0.306186  |
| TFL1A                     | 0.17161  | 2.8168   | 0.385462  |
| LOC100251852              | 17.6767  | 22.7319  | 5.3898    |
| LOC100240970              | 3.96675  | 7.42278  | 0.73946   |
| LOC104879745              | 0.264103 | 0.212129 | 1.2987    |
| LOC100854382              | 19.143   | 29.9699  | 1.43953   |
| LOC100247629              | 2.8703   | 2.94781  | 0.388169  |
| LOC100257884              | 35.894   | 6.48389  | 27.499    |
| LOC100266534              | 0.591031 | 2.56488  | 0.621176  |
| LOC100244310              | 4.8605   | 10.1851  | 2.04475   |
| LOC100263137              | 0.613666 | 3.24908  | 1.34123   |
| LOC104879766              | 16.9963  | 97.2996  | 42.9817   |
| LOC100240854              | 4.16039  | 0.316135 | 5.42717   |
| LOC104879760              | 6.29299  | 1.21925  | 0.335507  |
| LOC100249365              | 3.95452  | 41.8172  | 7.25996   |
| LOC100252749              | 4.41595  | 76.3777  | 12.7439   |
| LOC100241824              | 0        | 50.5641  | 0         |
| LOC100262435              | 6.12591  | 1.21788  | 6.40453   |
| LOC100257320              | 33.0492  | 14.6347  | 60.807    |
| LOC100252208              | 9.019    | 33.1451  | 3.7803    |
| LOC100257315              | 22.7428  | 3.06941  | 1.3847    |
| LOC104879791              | 3.16041  | 8.05904  | 0.908378  |
| LOC100245192              | 3.20493  | 15.5581  | 0.589443  |
| LOC100267577              | 7.70377  | 11.1943  | 1.78525   |
| LOC100250396              | 13.1545  | 3.42728  | 2.22352   |
| LOC100264200              | 34.597   | 118.275  | 7.71946   |
| LOC104879803              | 1.64145  | 15.319   | 3.52908   |
| LOC100255485              | 2.26094  | 0.307295 | 1.05838   |
| LOC100250305              | 1.86802  | 0.187966 | 1.03169   |
| LOC100252171,LOC100257220 | 0.930693 | 3.08492  | 0.677884  |
| LOC100246961              | 75.2764  | 168.74   | 35.1508   |
| LOC100264000              | 11.7292  | 2.02847  | 33.8595   |
| LOC104879809              | 6.49198  | 0.587753 | 1.92085   |
| LOC100246426              | 1.31759  | 6.56647  | 5.11423   |
| LOC100241302              | 1.97457  | 0.354944 | 0.045105  |
| LOC100244642              | 0.543452 | 2.35054  | 0.953694  |
| LOC100244540              | 0        | 0.848703 | 1.61918   |
| LOC100260006              | 0.383466 | 0.582434 | 2.07923   |
| LOC100256669              | 7.3678   | 1.52727  | 4.5997    |
| LOC100261685              | 1.38957  | 0.202788 | 0.301629  |
| LOC104879861              | 8.18239  | 1.02814  | 0.619821  |
| LOC104879829              | 3.42031  | 0.573611 | 1.02499   |
| LOC100252818              | 0.627011 | 1.03618  | 4.50173   |

|                           |           |          |           |
|---------------------------|-----------|----------|-----------|
| LOC100265401              | 1.91701   | 0.118357 | 0.17766   |
| LOC104879835              | 1.28551   | 0        | 0         |
| LOC100853192              | 7.63455   | 19.9263  | 4.25619   |
| LOC104879875              | 3.36213   | 0.183142 | 0.12484   |
| LOC100266575              | 7.22909   | 0        | 0.0245114 |
| LOC100265512              | 0.482627  | 0.703151 | 9.07795   |
| LOC100253540              | 2.84515   | 1.46708  | 7.82037   |
| LOC100263838              | 0.360429  | 0.14354  | 1.73013   |
| LOC100243307              | 4.14268   | 0.750407 | 0.387381  |
| LOC100253417              | 2.49973   | 0.349314 | 0.460314  |
| LOC100855319              | 0.558567  | 2.44685  | 0.878935  |
| LOC100258874              | 29.1218   | 99.3058  | 3.65753   |
| LOC100246286,LOC104879903 | 4.06402   | 1.14303  | 0.366316  |
| LOC100853053              | 11.183    | 10.3543  | 1.96327   |
| LOC104879900              | 4.01658   | 4.41408  | 0.358475  |
| LOC100264286              | 17.8148   | 27.9408  | 5.3976    |
| LOC100244283              | 11.1052   | 18.3505  | 0.9378    |
| LOC100243049              | 14.7576   | 3.45687  | 2.85847   |
| LOC100260285              | 0.167635  | 1.72583  | 0.26537   |
| LOC100242628              | 21.4633   | 2.84808  | 4.30802   |
| LOC100855039              | 160.585   | 23.9507  | 2.439     |
| LOC100242242              | 49.5462   | 264.626  | 201.447   |
| LOC100855250              | 5.38899   | 19.524   | 3.93523   |
| LOC100264675              | 175.978   | 11.6852  | 109.605   |
| LOC100244040              | 1.47301   | 0.468462 | 0         |
| LOC100250944              | 2.08778   | 0.255465 | 1.17235   |
| LOC100259358              | 11.58     | 1.7552   | 4.7549    |
| LOC100254182              | 0.148659  | 1.10392  | 0.0693295 |
| LOC104879942              | 1.01868   | 5.6725   | 0         |
| LOC100242403              | 0.429377  | 1.51445  | 6.40539   |
| LOC100252644              | 0.41999   | 2.56776  | 1.85483   |
| LOC100256122              | 0.0878048 | 0.554121 | 1.16259   |
| LOC100257784              | 1.10011   | 6.23966  | 1.50101   |
| LOC100259314              | 96.4913   | 2.05942  | 51.2246   |
| LOC100264547              | 0.149999  | 0.196342 | 6.10006   |
| LOC100252456              | 135.684   | 32.8503  | 132.748   |
| LOC100259462              | 7.84028   | 31.6633  | 9.39993   |
| LOC100250725              | 124.352   | 21.5576  | 99.8679   |
| LOC104879933              | 0.83664   | 4.49254  | 2.65507   |
| LOC100257796              | 37.9468   | 62.8764  | 11.0032   |
| LOC100261123              | 135.083   | 65.9502  | 10.3028   |
| IFRL3                     | 0.860059  | 2.28578  | 12.3211   |
| LOC100264774              | 0.116814  | 1.05695  | 3.60756   |
| LOC100249474              | 2.02335   | 4.654    | 0.173055  |
| LOC100255529              | 3.4163    | 1.42934  | 5.99916   |
| LOC100248634              | 3.39277   | 1.80712  | 10.7884   |
| LOC100244179              | 3.20218   | 7.31955  | 17.2175   |

|                           |          |           |           |
|---------------------------|----------|-----------|-----------|
| LOC100853040              | 0.321368 | 26.9811   | 6.91023   |
| LOC100259570              | 0.325795 | 2.13115   | 0.33665   |
| LOC100264747              | 0.325762 | 0.0375904 | 13.9142   |
| LOC104879781              | 0.129052 | 2.45429   | 0.241781  |
| LOC104879778              | 44.8293  | 6.443     | 26.3664   |
| LOC104879776              | 6.34867  | 34.4664   | 8.52399   |
| LOC100266643              | 27.4487  | 0.865284  | 0.100359  |
| LOC104879766              | 3.71543  | 16.2137   | 13.272    |
| LOC100257206              | 2.08786  | 2.08504   | 0.296962  |
| LOC100253802              | 19.0869  | 48.618    | 1.90609   |
| LOC100265889              | 3.63274  | 4.08852   | 59.0401   |
| LOC100243451              | 37.8707  | 5.78266   | 20.1004   |
| LOC100265859              | 2.16222  | 10.0262   | 3.96523   |
| LOC100260647              | 4.42565  | 3.1361    | 0.642163  |
| LOC100852938              | 10.0485  | 38.0723   | 3.70888   |
| LOC100252066              | 693.051  | 49.5842   | 884.319   |
| LOC100264193              | 14.6809  | 3.75631   | 1.10108   |
| LOC104879846              | 0.37057  | 0.262334  | 1.16472   |
| LOC100251450              | 6.80671  | 28.5247   | 12.9427   |
| LOC100248141              | 1.0447   | 0.320328  | 1.45958   |
| LOC104879827              | 3.36446  | 0.126125  | 0         |
| LOC100256767              | 0.182645 | 0         | 4.47817   |
| LOC100243102              | 2.63182  | 0         | 0         |
| LOC100241465,LOC100263724 | 11.2754  | 10.1819   | 423.321   |
| LOC100251642              | 0.439047 | 1.6857    | 4.82539   |
| LOC104879891              | 0.529344 | 0         | 1.80806   |
| LOC104879882              | 0        | 11.179    | 0         |
| LOC100854123              | 1.0674   | 0.6708    | 0         |
| LOC100256084              | 8.06204  | 5.25244   | 1.40717   |
| LOC100259363              | 36.012   | 92.106    | 2.45646   |
| LOC100245674              | 2.60478  | 11.2017   | 3.76355   |
| LOC100259515              | 655.23   | 157.733   | 418.391   |
| LOC104879923              | 1.11516  | 1.86923   | 0.458844  |
| LOC100261215              | 8.16947  | 8.98316   | 1.818     |
| LOC100257640              | 0.10474  | 1.16956   | 0.0924242 |
| LOC100250831              | 3.32389  | 0.709472  | 0.0904013 |
| LOC100267875              | 0.750471 | 2.17934   | 0.436345  |
| LOC100250895              | 41.4107  | 4.34057   | 41.7829   |
| LOC100256159              | 2.47784  | 0.331109  | 1.93437   |
| LOC100252515              | 4.53408  | 0.806595  | 5.36383   |
| LOC100263050              | 50.8578  | 26.8268   | 3.96534   |
| LOC104879965              | 1.8705   | 0.863554  | 6.07851   |
| LOC100249588,LOC104879975 | 8.48171  | 14.3023   | 1.8568    |
| LOC100249588              | 1.83847  | 2.67507   | 0.473101  |
| LOC100251316              | 0.183632 | 0.304999  | 3.055     |
| LOC104879979,LOC104879980 | 14.3224  | 1.37727   | 2.50793   |
| LOC100265818              | 18.7925  | 36.5371   | 7.04108   |

|                           |          |           |          |
|---------------------------|----------|-----------|----------|
| LOC100250354              | 2.12009  | 7.66494   | 0.658791 |
| LOC104880026              | 0        | 0.99765   | 2.5257   |
| LOC100263665              | 1.60119  | 7.29939   | 0.345205 |
| LOC100253452              | 4.02888  | 7.47098   | 1.28302  |
| LOC100258515              | 7.15837  | 0.345866  | 1.76312  |
| LOC100854993              | 6.28538  | 2.34424   | 0.447158 |
| LOC100251758              | 30.0713  | 5.98565   | 10.4089  |
| LOC100853498              | 1.3623   | 0.337177  | 0.666217 |
| LOC100260187              | 0.440093 | 2.03204   | 0.548918 |
| LOC104880074              | 1.36015  | 3.44605   | 0.836852 |
| LOC100262021              | 2.008    | 9.41836   | 4.81767  |
| LOC100255006,LOC104880068 | 9.28071  | 106.416   | 15.3624  |
| LOC100256829              | 2.44224  | 46.5965   | 1.89335  |
| LOC104880069              | 1.82369  | 7.59159   | 1.36835  |
| LOC100260104              | 7.84313  | 41.0999   | 10.0094  |
| LOC100255176              | 0.328728 | 1.89052   | 0.430023 |
| LOC100253412              | 16.0518  | 1.14409   | 11.138   |
| LOC100255182              | 13.1662  | 2.58359   | 4.10918  |
| LOC100248323              | 40.4622  | 4.07291   | 2.51778  |
| LOC104880058              | 0        | 0.0544109 | 11.309   |
| LOC104880057              | 4.07802  | 1.39305   | 0.990267 |
| LOC100233062              | 16.1331  | 3.4022    | 8.41937  |
| LOC100854914              | 8.21379  | 1.5017    | 10.9553  |
| LOC100256842              | 4.44349  | 1.50991   | 13.1416  |
| LOC100267121              | 3.6312   | 13.2186   | 0.965619 |
| LOC104880042              | 5.774    | 1.31326   | 3.80579  |
| LOC100249322              | 2.95378  | 18.1691   | 4.99842  |
| LOC100247802              | 75.065   | 8.59143   | 36.6426  |
| LOC100244158,LOC100249316 | 54.4394  | 11.2326   | 40.6409  |
| LOC100252790              | 16.1087  | 2.01582   | 2.44817  |
| LOC100247682              | 2.0022   | 8.75932   | 2.05946  |
| LOC100242547              | 0.739876 | 4.92226   | 1.07138  |
| LOC100264838              | 1.12188  | 9.35943   | 2.80343  |
| LOC100254537              | 79.1647  | 174.438   | 35.9487  |
| LOC100240924              | 245.89   | 52.2471   | 184.596  |
| LOC100247753              | 18.6737  | 0.286507  | 0.201085 |
| LOC100247789              | 103.648  | 66.4728   | 15.1847  |
| LOC104880154              | 2.1174   | 0.523622  | 0.929464 |
| LOC100263016              | 2.13049  | 0.451042  | 0.978716 |
| LOC100266652              | 20.1202  | 1.96015   | 1.34953  |
| LOC100261446              | 2.30421  | 13.814    | 7.52673  |
| LOC100267540              | 4.91753  | 20.8335   | 6.95589  |
| LOC100267549              | 8.21774  | 1.95633   | 4.0355   |
| LOC100267423              | 0        | 0.203456  | 1.59731  |
| LOC100853129              | 1.01018  | 12.2973   | 0.176785 |
| LOC104880131              | 1.40798  | 2.48844   | 0.415111 |
| LOC104880130              | 1.41503  | 7.73542   | 0.61447  |

|                           |           |          |           |
|---------------------------|-----------|----------|-----------|
| LOC100250432              | 0.590692  | 3.73645  | 0         |
| LOC100262356              | 47.0102   | 5.09079  | 28.778    |
| LOC100247068              | 14.8915   | 80.0875  | 49.6907   |
| LOC100263995              | 7.90585   | 1.86996  | 1.09607   |
| AGA                       | 275.831   | 63.8042  | 75.2941   |
| LOC100246945              | 0.912416  | 4.28908  | 4.33712   |
| LOC100257236              | 1.81236   | 12.3329  | 4.10915   |
| LOC100241812              | 0.351415  | 1.36761  | 1.86619   |
| LOC100243382              | 11.6877   | 8.82536  | 35.9771   |
| LOC100247929              | 11.544    | 6.25617  | 25.4484   |
| LOC100259819              | 27.7531   | 4.16872  | 3.9152    |
| LOC100266002              | 7.01585   | 29.4741  | 0.282079  |
| LOC100250551              | 7.52919   | 25.1199  | 0.465927  |
| LOC100262692              | 0.366782  | 1.54026  | 1.38742   |
| LOC100255734              | 141.317   | 20.3118  | 87.8054   |
| LOC100259167              | 43.8671   | 9.4809   | 28.5219   |
| LOC100267833,LOC104880027 | 3.53598   | 0.992046 | 12.5913   |
| LOC100249969              | 0.506972  | 2.35422  | 0.686774  |
| LOC100251671              | 2.22111   | 1.06455  | 0.51361   |
| LOC100241389              | 5.42646   | 2.1118   | 1.08187   |
| LOC100255095              | 203.159   | 208.575  | 35.5041   |
| LOC100265504              | 5.65583   | 25.2853  | 11.8047   |
| LOC100258578              | 0.392162  | 1.63602  | 0.608348  |
| LOC100258555              | 6.47245   | 8.89018  | 1.14488   |
| MLO11                     | 3.06809   | 1.4749   | 13.507    |
| LOC100255195              | 1.4897    | 0.46303  | 0.315542  |
| LOC100261866              | 2.46163   | 0.247967 | 0         |
| LOC100244805              | 0.789175  | 5.42183  | 0.517317  |
| LOC100249942              | 0.701381  | 1.43983  | 0.308755  |
| LOC100267136              | 0.371516  | 3.06607  | 1.63003   |
| LOC100249962              | 35.3263   | 6.637    | 38.3268   |
| LOC100244361              | 7.62415   | 12.9464  | 1.6135    |
| LOC100245988              | 24.2875   | 1.69902  | 36.8886   |
| LOC100854743              | 4.35312   | 1.37355  | 10.475    |
| LOC100242633              | 0         | 1.48282  | 0.0349882 |
| LOC104880166              | 1.93763   | 2.94333  | 0.186863  |
| LOC100252758              | 2.66711   | 0.47423  | 7.03449   |
| LOC100240776              | 51.659    | 11.4425  | 12.6711   |
| LOC100246012              | 6.28032   | 26.8639  | 10.4234   |
| LOC100264798              | 0.0869814 | 3.05183  | 0.208823  |
| LOC100247748              | 3.88802   | 0.587298 | 2.16109   |
| LOC100251106              | 4.6033    | 0.454477 | 0.310341  |
| LOC100252858              | 7.94919   | 17.6169  | 3.25115   |
| LOC104880161              | 2.68689   | 2.56657  | 0.489052  |
| LOC100263022              | 0.851846  | 3.26571  | 0.759823  |
| LOC100242499              | 1.40865   | 0        | 0         |
| LOC100263063              | 1.02708   | 0        | 0.499385  |

|              |           |           |           |
|--------------|-----------|-----------|-----------|
| LOC104880155 | 7.65856   | 5.6414    | 1.01224   |
| LOC100251141 | 29.2151   | 0.0636196 | 14.3672   |
| LOC100252898 | 0.285956  | 2.53938   | 1.33069   |
| LOC100259742 | 227.559   | 54.4814   | 177.487   |
| LOC100245950 | 0.889636  | 4.30211   | 1.68927   |
| LOC100254632 | 0.974316  | 0         | 0         |
| LOC100263055 | 1.45886   | 0         | 0.0904811 |
| LOC100253862 | 12.4226   | 4.13488   | 21.6127   |
| LOC100264066 | 2.86902   | 6.70447   | 1.61107   |
| LOC100248651 | 4.06639   | 7.6243    | 1.83958   |
| LOC100255547 | 5.04757   | 39.1378   | 12.0607   |
| LOC100262373 | 2.94388   | 0.315073  | 3.66657   |
| LOC100253858 | 194.092   | 37.9182   | 92.1729   |
| LOC100247001 | 0.750025  | 4.82126   | 0.182964  |
| LOC100855222 | 0.30667   | 2.44824   | 0.209248  |
| LOC100853096 | 4.21059   | 4.70115   | 0.808329  |
| LOC100241869 | 1.31112   | 5.55665   | 1.17915   |
| LOC100264128 | 11.4897   | 124.218   | 37.1341   |
| LOC100852723 | 17.2429   | 3.83232   | 10.5086   |
| G1           | 78.3072   | 105.394   | 359.72    |
| LOC100255598 | 8.48701   | 30.3148   | 7.09536   |
| LOC100250413 | 1.12248   | 7.6223    | 1.03763   |
| LOC100260578 | 128.24    | 27.8832   | 35.3028   |
| LOC100250331 | 7.33941   | 0.113479  | 1.25272   |
| LOC100243444 | 15.8005   | 1.25087   | 9.16841   |
| LOC100250296 | 2.03764   | 0.4081    | 0         |
| LOC104880107 | 26.0561   | 5.76111   | 4.47921   |
| CHLH         | 596.762   | 137.626   | 628.858   |
| LOC100260694 | 1.0928    | 1.38199   | 9.95633   |
| LOC100245312 | 4.05573   | 1.50652   | 7.46235   |
| LOC100262460 | 3.25108   | 0.522552  | 0.981786  |
| LOC104880196 | 2.23417   | 4.40464   | 0.775765  |
| LOC100254856 | 2.38206   | 0.252237  | 0.293747  |
| LOC100242898 | 2.78037   | 7.65172   | 0.384237  |
| LOC100265188 | 6.83111   | 30.9775   | 1.16997   |
| LOC100261740 | 0.179603  | 3.67245   | 0.438922  |
| LOC100246365 | 63.7486   | 14.1158   | 41.2401   |
| LOC100256554 | 70.7892   | 15.6491   | 37.1033   |
| LOC100246433 | 1.44165   | 12.1963   | 3.13367   |
| LOXO         | 53.1377   | 120.914   | 20.7648   |
| LOC100244649 | 3.75484   | 0.889078  | 0.941105  |
| LOC100855049 | 0.0373192 | 0.320802  | 2.80008   |
| LOC104880215 | 6.02766   | 4.50322   | 1.23526   |
| LOC104880217 | 7.40312   | 1.73336   | 3.09501   |
| LOC100251455 | 14.933    | 2.04021   | 11.0729   |
| LOC100242932 | 0.108314  | 0.30951   | 6.63557   |
| LOC100253270 | 4.72765   | 0.456692  | 5.73281   |

|                           |           |           |           |
|---------------------------|-----------|-----------|-----------|
| LOC104877404              | 21.5759   | 0         | 0         |
| LOC100233007              | 5.8321    | 24.5419   | 11.6887   |
| LOC100260016,LOC104880223 | 12.882    | 5.73787   | 67.6056   |
| LOC100251452              | 1.28457   | 6.47266   | 13.8015   |
| LOC104877415              | 0.645922  | 0         | 8.41153   |
| LOC100254916              | 0.197007  | 0.146581  | 5.14525   |
| LOC100248136              | 2.93102   | 1.08361   | 0.215785  |
| LOC100249745              | 63.4243   | 3.9624    | 3.79912   |
| LOC100251538              | 6.01298   | 0.958593  | 1.49014   |
| LOC100855084              | 1.67241   | 0.521159  | 0.397264  |
| LOC100241155              | 0.321982  | 5.24376   | 1.63119   |
| LOC100263507              | 0.342396  | 2.00388   | 0.93215   |
| LOC100267014              | 0.0123296 | 0.256929  | 1.65121   |
| LOC104880259              | 5.39584   | 15.0916   | 3.40804   |
| LOC100261053              | 22.3171   | 1.70896   | 6.22358   |
| LOC100254203              | 1.56712   | 7.19837   | 9.29607   |
| LOC100245669              | 0.634813  | 1.15602   | 2.6847    |
| LOC100854840              | 0.0800336 | 0         | 2.64832   |
| LOC100255171              | 1.07708   | 2.51377   | 101.002   |
| LOC100250015              | 4.32172   | 4.42011   | 51.3704   |
| LOC100242509              | 2.10796   | 0.851124  | 5.11654   |
| LOC100265456              | 0.219567  | 0.0715418 | 10.2302   |
| LOC100264399              | 1.05827   | 0.306608  | 32.8023   |
| LOC100259222              | 6.24324   | 3.83045   | 50.9986   |
| LOC100266984,LOC104880318 | 20.0769   | 2.35377   | 12.3757   |
| LOC100853390              | 4.9271    | 0.0941    | 5.34787   |
| LOC100241212              | 0.466212  | 3.51382   | 1.33455   |
| LOC104880277              | 10.7898   | 19.1067   | 3.32391   |
| LOC100259281              | 4.1789    | 30.7356   | 9.89821   |
| LOC100267836              | 0         | 2.48277   | 0.149616  |
| LOC100257552              | 1.14293   | 1.77681   | 0.0676765 |
| LOC100247196              | 0.138722  | 1.23516   | 1.38781   |
| LOC104880337              | 0         | 0.436816  | 1.09874   |
| LOC100261932,LOC104880348 | 0.659758  | 2.49061   | 4.94855   |
| LOC104880349,LOC104880350 | 13.7558   | 6.31963   | 1.42946   |
| LOC104880338              | 0         | 11.3252   | 5.59319   |
| LOC104880339              | 0         | 0.0685695 | 5.76608   |
| LOC104877381              | 0         | 3.53715   | 5.88537   |
| LOC100258460              | 0.634545  | 3.35293   | 0.711635  |
| LOC104880354              | 2.5755    | 0         | 0         |
| LOC104880365              | 0.818462  | 0         | 1.35161   |
| LOC104880391              | 1.12613   | 2.43132   | 4.82683   |
| LOC100253480              | 27.7706   | 80.7769   | 6.42777   |
| LOC104880396              | 0.0345771 | 0.119479  | 1.66816   |
| LOC104880397              | 0.586966  | 0.959411  | 5.71792   |
| LOC100263845              | 0.0756043 | 0.0355788 | 20.5238   |
| LOC100256964              | 6.99802   | 37.2671   | 4.67774   |



|                           |          |           |          |
|---------------------------|----------|-----------|----------|
| LOC104880403              | 0.204799 | 1.31234   | 0.454847 |
| LOC104880385              | 0.464346 | 4.88921   | 1.6809   |
| LOC104880387              | 0.19701  | 0.0771668 | 1.95477  |
| LOC100246923,LOC104880447 | 0.434991 | 0.434963  | 3.47504  |
| LOC104880426              | 33.6093  | 2.37062   | 14.3878  |
| LOC100246219              | 0.563822 | 0.061803  | 12.7904  |
| LOC104880440              | 0        | 4.46161   | 0        |
| LOC104880417              | 0.010367 | 9.13763   | 0        |
| LOC100266713              | 0        | 9.60225   | 0        |
| LOC100261598              | 42.5241  | 2.56377   | 39.0232  |
| LOC100265158              | 1.58905  | 0.972992  | 0.186178 |
| LOC104880200              | 3.29791  | 0         | 0        |
| LOC100251477              | 0.022083 | 0.286416  | 1.58088  |
| LOC100265183              | 3.40891  | 0.201628  | 40.4631  |
| LOC100259980              | 9.78021  | 0.412777  | 0.193328 |
| LOC104880212              | 0.587648 | 2.93741   | 1.41332  |
| LOC100248134              | 21.5305  | 3.09508   | 5.4124   |
| LOC104880301              | 1.30054  | 0.254431  | 0.252188 |
| LOC100261679              | 5.33643  | 0.850834  | 6.53529  |
| LOC100251419              | 1.35625  | 0.840169  | 23.4054  |
| LOC100242179              | 0.918744 | 2.17599   | 4.53326  |
| LOC100268133              | 0.35517  | 1.45542   | 0.174062 |
| LOC104880276              | 4.66306  | 0         | 0.631866 |
| LOC104880320              | 1.63557  | 0.622753  | 2.77288  |
| LOC100242170              | 21.0709  | 4.21697   | 3.25187  |
| LOC100264601              | 13.2745  | 2.69224   | 5.14547  |
| LOC104880285              | 2.86922  | 78.9732   | 9.41255  |
| LOC100265292              | 0.103972 | 2.61843   | 0.899538 |
| LOC100251433              | 0.266234 | 1.27575   | 0.869683 |
| LOC100255021              | 2.3817   | 1.03511   | 21.7235  |
| LOC100855170              | 0.103455 | 10.3879   | 10.3606  |
| LOC100250200              | 174.467  | 40.6287   | 56.4801  |
| LOC100265551              | 0.486051 | 0.208824  | 5.18766  |
| LOC100248363              | 0.634795 | 0.326047  | 7.83948  |
| LOC100852567              | 0.414725 | 0.138785  | 10.422   |
| LOC100852491              | 1.12733  | 0.485655  | 20.3347  |
| LOC104880387              | 1.89995  | 0.239624  | 22.1082  |
| LOC100242837              | 2.70505  | 2.37235   | 0        |
| LOC104880440              | 0        | 12.6167   | 0        |
| LOC100253008              | 4.95845  | 1.1887    | 11.6394  |
| LOC100263288              | 1.09274  | 0.610292  | 0        |
| LOC100249623,LOC100259856 | 11.2858  | 2.72436   | 44.0995  |
| LOC100254746              | 0.532625 | 0.421827  | 2.10857  |
| LOC100251248              | 2.5567   | 0.301508  | 1.38974  |
| LOC100263348              | 1.01171  | 13.3349   | 1.24547  |
| LOC100256402              | 8.31429  | 2.0318    | 12.0101  |
| LOC100256501              | 57.1123  | 11.741    | 56.5016  |

|              |         |          |         |
|--------------|---------|----------|---------|
| LOC100249107 | 1.27807 | 0.549406 | 3.38383 |
| LOC100254640 | 74.8337 | 43.8543  | 2.79561 |
